# Supplementary material for: Economic crisis and smoking behaviour: prospective cohort study in Iceland
Source: PubMed Central journal article supplement — BMJ Open. 2012 Oct 8;2(5):e001386. doi: 10.1136/bmjopen-2012-001386 (PMC3488705; doi:10.1136/bmjopen-2012-001386), 2012-10-08
Supplement: bmjopen-2012-001386.draft_revisions.pdf [file bmjopen-2012-001386.draft_revisions.pdf]

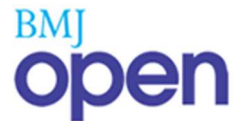

## Economic crisis and smoking behaviour: Prospective cohort study in Iceland

|                                 |                                                                                                                                                                                                                                                                                                                                                                                                                        |
|---------------------------------|------------------------------------------------------------------------------------------------------------------------------------------------------------------------------------------------------------------------------------------------------------------------------------------------------------------------------------------------------------------------------------------------------------------------|
| Journal:                        | <i>BMJ Open</i>                                                                                                                                                                                                                                                                                                                                                                                                        |
| Manuscript ID:                  | bmjopen-2012-001386                                                                                                                                                                                                                                                                                                                                                                                                    |
| Article Type:                   | Research                                                                                                                                                                                                                                                                                                                                                                                                               |
| Date Submitted by the Author:   | 26-Apr-2012                                                                                                                                                                                                                                                                                                                                                                                                            |
| Complete List of Authors:       | McClure, Christopher; Centre of Public Health Sciences, University of Iceland, Department of Medicine<br>Valdimarsdttir, Unnur; Centre of Public Health Sciences, University of Iceland, Department of Medicine<br>Hauksdóttir, Arna; Centre of Public Health Sciences, University of Iceland, Department of Medicine<br>Kawachi, Ichiro; Harvard School of Public Health, Department of Society Human Development and |
| <b>Primary Subject Heading</b>: | Smoking and tobacco                                                                                                                                                                                                                                                                                                                                                                                                    |
| Secondary Subject Heading:      | Public health, Epidemiology, Mental health, Health economics, Addiction                                                                                                                                                                                                                                                                                                                                                |
| Keywords:                       | PUBLIC HEALTH, Adult psychiatry < PSYCHIATRY, EPIDEMIOLOGY, MENTAL HEALTH, Health economics < HEALTH SERVICES ADMINISTRATION & MANAGEMENT                                                                                                                                                                                                                                                                              |
|                                 |                                                                                                                                                                                                                                                                                                                                                                                                                        |

SCHOLARONE™  
Manuscripts

only

# Economic crisis and smoking behaviour: Prospective cohort study in Iceland

Christopher B. McClure, *doctoral student*,<sup>1</sup> Unnur A. Valdimarsdóttir, *professor and chair*,<sup>1</sup>  
Arna Hauksdóttir, *assistant professor*<sup>1</sup>, Ichiro Kawachi, *professor and chair*<sup>2</sup>

1. Centre of Public Health Sciences, University of Iceland, Stapi on Hringbraut, 101 Reykjavik, Iceland
2. Department of Society, Human Development, and Health, Harvard School of Public Health, 677 Huntington Avenue, Kresge Building 7th Floor, Boston, Massachusetts 02115, USA

**Correspondence to:** C McClure [cbm1@hi.is](mailto:cbm1@hi.is)

“The Corresponding Author has the right to grant on behalf of all authors and does grant on behalf of all authors, a worldwide licence to the Publishers and its licensees in perpetuity, in all forms, formats and media (whether known now or created in the future), to i) publish, reproduce, distribute, display and store the Contribution, ii) translate the Contribution into other languages, create adaptations, reprints, include within collections and create summaries, extracts and/or, abstracts of the Contribution, iii) create any other derivative work(s) based on the Contribution, iv) to exploit all subsidiary rights in the Contribution, v) the inclusion of electronic links from the Contribution to third party material where-ever it may be located; and, vi) licence any third party to do any or all of the above.”

## Abstract

**Objective** To determine whether the strains of a national economic collapse affect smoking secession and risk of smoking relapse in the population.

**Design** A population-based, prospective cohort study based on a mail survey (*Health and Wellbeing in Iceland*) assessed in 2007 and 2009.

**Setting** National mail survey

**Participants** Representative cohort (n=3755) of Icelandic adults.

**Main outcome measure** Smoking status.

**Results** A significant reduction in the prevalence of smoking was observed from 2007 (pre-collapse) to 2009 (post-collapse) in both males (17.4% to 14.8%; P 0.01) and females (20.0% to 17.5%; P 0.01) in the cohort (n= 3755). An increase in perceived stress levels from pre- to post-collapse was associated with the risk of smoking relapse (odds ratio 2.08; 95% confidence interval 1.32, 3.30), as was an increase in income from pre- to post-collapse among males (OR 6.53; 95% CI 1.58, 26.95). Conversely, male former smokers experiencing a reduction in income were less likely to relapse (OR 0.23; 95% CI 0.08, 0.62). Regarding the propensity of pre-collapse smokers to quit in the period after the collapse, female smokers were less likely to quit compared to males (OR 0.67; 95% CI 0.52, 0.87).

**Conclusions** In line with on-going secular trend, the overall prevalence of smoking continued to decrease following the 2008 economic crisis in Iceland. Increase in psychological stress and income during the period 2007-2009 were strongly associated with having relapsed in 2009, particularly among men.

### Article Summary

#### Article Focus

- ◆ An examination on the association between economic crises and smoking behaviours, i.e. is a change in income related to a change in smoking status?
- ◆ What is the role of stress change on an individual's propensity to relapse or quit smoking?

#### Key Messages

- ◆ Evidence for the association between increased income and increased risk of smoking relapse following an economic collapse.
- ◆ Evidence for an association between decreased income and decreased risk of relapse.
- ◆ Gender differences in smoking—represented by higher female prevalence rates and decreased likelihood of quitting for females compared to males.

#### Strengths and limitations of this study

- ◆ A representative prospective cohort study assessed at two time points, which straddle the start of a severe economic crisis.

1  
2  
3  
4  
5  
6  
7  
8  
9  
10  
11  
12  
13  
14  
15  
16  
17  
18  
19  
20  
21  
22  
23  
24  
25  
26  
27  
28  
29  
30  
31  
32  
33  
34  
35  
36  
37  
38  
39  
40  
41  
42  
43  
44  
45  
46  
47  
48  
49  
50  
51  
52  
53  
54  
55  
56  
57  
58  
59  
60

◆ Due to the low number of individuals that change their smoking behaviours in a short period, we were unable to assess the effects of an unemployment change on smoking habits.

For peer review only

## Introduction

The Icelandic economy was severely affected by the global economic collapse of 2008. After a decade-long period of financial prosperity the nation was plunged into a recession of such severity that similar contractions had only been seen a handful of times before.<sup>1 2</sup>

Previous research on the health consequences of the Icelandic economic collapse has suggested adverse impacts on cardiovascular and mental health among women.<sup>3 4</sup> In the broader literature on economic crises and population health, however, it has been debated whether health moves in a pro-cyclical or counter-cyclical direction to macro-economic conditions. The work of Brenner beginning in the 1970s suggested that mortality is counter-cyclical, i.e. when the economy is down, mortality rates – in particular, suicides – rise.<sup>5</sup> However, in more recent years, a series of econometric studies have suggested that mortality is pro-cyclical, i.e. during economic contractions death rates decline.<sup>6 7 8 9</sup> There are plausible reasons for this unexpected finding – for instance, during the 1998 Korean financial crisis, economic activity was so depressed that there was a detectable decline in traffic-related mortality.<sup>10</sup> Others have speculated – without direct evidence – that people are more likely to be over-worked and “stressed” during economic booms than during busts, having less time flexibility to engage in health promoting behaviours.<sup>11 12</sup>

Few studies, however, have used individual-level data to test the association between recession and health. Most of the evidence to date has been at the ecological level. Using U.S. data, Ruhm previously reported that economic recession was associated with a decline in the prevalence of cigarette smoking.<sup>12</sup> In the present study, we took advantage of the natural experiment afforded by the Icelandic crisis to examine the relationship between changes in economic conditions and smoking behaviour. Utilizing a prospective cohort of Icelandic adults assessed before (in 2007) and after the start of the collapse (in 2009), we sought to examine the risk of relapse among pre-collapse former smokers, as well as quitting behaviour among current smokers.

## Methods

### Design and Samples

#### Cohort

Our cohort is based on the *Health and Wellbeing in Iceland* health survey. Data was collected by a questionnaire in two waves: (1) from October to December of 2007 (10-12 months pre-collapse), then again (2) between November and December of 2009 (13-14 months post-collapse). The cohort was based on a stratified random sample of the Icelandic population (n=9807), which was selected from 12 strata: consisting of two geographic regions further stratified by six age groups. Of the initial 9807, a total of 5918 responded to the initial 2007

1  
2  
3 assessment (response rate of 60.3%), with 4092 responding again to the modified version of the  
4 survey in 2007 (response rate of 82.8% of those who responded to the pre-collapse baseline  
5 survey). Because of the importance of stress as a potential predictor of smoking behaviour, we  
6 excluded individuals who did not have complete responses to the *Perceived Stress Scale* in both  
7 2007 and 2009. This left a final analytical sample of n=3755. Figure 1 shows the cohort attrition  
8 over questionnaire waves.  
9  
10

## 11 **Measures**

### 12 *Smoking status and behaviour*

13  
14  
15 In the questionnaire, we inquired about smoking status, i.e. whether respondents were current  
16 smokers, had quit smoking, or had never smoked. In order to examine the likelihood of relapsing  
17 or quitting following an economic collapse, respondents were stratified according to their  
18 smoking status: non-smoker, relapsed, and quit smoking.  
19  
20  
21

22  
23 Non-smoker: An individual was classified as a non-smoker if they responded that they did not  
24 currently smoke on both the 2007 and 2009 assessments.  
25

26  
27 Relapsed smoker: An individual was identified as relapsed if they indicated that they (a) were a  
28 former smoker on the 2007 questionnaire, but indicated they had (b) smoked in any frequency in  
29 2009. In our analyses estimating the odds ratios of relapse, the base population was restricted to  
30 individuals who were former smokers at baseline.  
31

32  
33 Quit smoking: A respondent that had quit smoking must have indicated that they were (a)  
34 currently smoking in 2007, yet had (b) quit smoking by 2009. In our analyses estimating the odds  
35 ratios of quitting, our base population was restricted to individuals who were current smokers at  
36 baseline.  
37  
38

### 39 *Change in economic status*

40  
41 Additional socio-economic questions pertained to employment and income status. Employment  
42 status was categorized into either (1) employed or (2) unemployed. Household income was  
43 classified into income ranges of (in terms of Icelandic currency; *ISK*) (1) low ( $\leq 3.4$  million  
44 *ISK*), (2) middle (3.5-9.4 million *ISK*), and (3) high ( $\geq 9.5$  million *ISK*); corresponding  
45 approximately to (1)  $\leq 28,000$  USD, (2) 28,000-77,000 USD, and (3)  $\geq 77,000$  USD. For  
46 analysis of income change, household income was further dichotomized into either high or “low”  
47 (which combined the middle & low income categories). We examined two types of income  
48 change: a) drop in income between 2007 and 2009 from high to low; and b) a rise in income  
49 between 2007 and 2009 from low to high.  
50  
51  
52  
53

### 54 *Change in perceived stress*

1  
2  
3 Psychological stress was measured in both 2007 and 2009 using the four-item Perceived Stress  
4 Scale (PSS-4).<sup>13</sup> The PSS-4 is a shortened, validated, and acceptable substitute for the original  
5 scale,<sup>14</sup> with scores ranging from 0-16; the higher the score, the higher the perceived stress. An  
6 increase in stress was classified as any increase from baseline to follow-up; conversely, a  
7 decrease was classified as any decrease from baseline to follow-up. For example, an individual  
8 with a score of 5 in 2007 and a score of 10 in 2009, would be classified as having an increase in  
9 stress.

### 13 *Explanatory variables and demographics*

14  
15  
16 Our regression models controlled for the following socio-demographic covariates: age, sex,  
17 marital status, and education. Education was categorized as (1) basic (completed primary school  
18 or less), (2) middle (completed high school or equivalent), and (3) university (a completed  
19 university degree).

### 22 **Statistical analyses**

23  
24 Table 1 presents the distribution of socio-demographic characteristics according to change in  
25 smoking status between 2007 and 2009.

26  
27  
28 Binary logistic regression was used to estimate ratio of odds (corresponding 95% confidence  
29 intervals) of relapse in 2009 (table 2), and the odds of quitting smoking in 2009 (table 3) by  
30 background characteristics, change in income and stress levels. Analyses were also stratified by  
31 gender. Models were adjusted for age, sex, marital status, and educational level; models for  
32 household income-specific odds were additionally adjusted for the number of adults in the  
33 household. As previous research supports the role of stress as a mediator of an individual's  
34 propensity to relapse,<sup>17 18 19</sup> we also ran models of relapse with and without the inclusion of  
35 change in stress levels between 2007 and 2009.

36  
37  
38 Repeated measures ANOVA (p-values, F statistic) was used to examine overall and gender-  
39 specific mean differences in stress levels from 2007 to 2009 (table 4). Statistical analyses were  
40 conducted with IBM SPSS Statistics version 19.0 (SPSS Inc, Chicago, Illinois). Statistical  
41 significance was set at the 0.05 level, and all tests were 2-tailed.

## 48 **Results**

### 50 **Baseline characteristics**

51  
52 Table 1 describes the baseline characteristics of the cohort in 2007 (n=3755), which was 53.0%  
53 female, 76.7% married/cohabiting, and with a mean (SD) age of 52.3 (16.0). Table 1 also  
54 describes the characteristics of those that had relapsed and quit: 72.2% (n=2711) of the cohort  
55 were non-smokers, 4.0% (n=56) of the former smokers at baseline had relapsed in 2009, and  
56  
57  
58  
59  
60

1  
2  
3 22.2% (n=149) of smokers at baseline had quit smoking in 2009. A significant reduction  
4 (p<0.01) in the prevalence of smokers was observed from 2007 to 2009 in both males (17.4% to  
5 14.8%) and females (20.0% to 17.5%).  
6  
7

### 8 **Relapse smoking**

9  
10 Among individuals who were former smokers at baseline (table 2), an increased risk of relapsing  
11 in 2009 (after the collapse) was observed in the younger age groups (compared to those aged 50-  
12 59), specifically among females aged 18-29 (3.70; 1.21, 11.27) and males aged 30-39 (2.89;  
13 1.07, 7.82). Further age-stratification found that men over 70 years of age were significantly less  
14 likely to relapse (0.14; 0.03, 0.62).  
15  
16

17  
18 While an individual's change in employment status from 2007 to 2009 was not involved in risk  
19 of relapsing, males receiving disability pension (compared to the employed) were less likely to  
20 relapse (0.13; 0.03, 0.62), while retired females showed significant increased risk of relapsing  
21 (5.30; 2.01, 13.98), compared to the employed.  
22  
23

24 Among men in the lower income groups at baseline (i.e. low, middle), those who moved into the  
25 high income group in 2009 experienced an increased risk of relapse (6.53; 1.58, 26.95)—while  
26 among those in the high income group at baseline, those whose incomes dropped had a decreased  
27 risk of relapsing (2.82; 1.17, 6.83). Further adjustments for a change in stress levels from 2007 to  
28 2009, showed some attenuation in the coefficients, suggesting some mediation by perceived  
29 stress – i.e. former smokers whose incomes increased between 2007 and 2009 may have relapsed  
30 in part because of an increase in stress.  
31  
32  
33

### 34 **Smoking cessation**

35  
36 Women were less likely to quit smoking in 2009 (0.67; 0.52, 0.87), compared to males. An  
37 increased likelihood of quitting in 2009 was observed among the following female groups: those  
38 with middle (2.16) or university-level (2.50) education compared to a basic, and the disabled  
39 (4.73) compared to the employed. Additionally, compared to aged 50-59, females in the  
40 youngest (3.83; 1.51, 9.72) and oldest groups (4.72; 1.47, 15.12) were considerably more likely  
41 to quit.  
42  
43  
44

### 45 **Stress and smoking**

46  
47 With regard to the potential role of stress on an individual's likelihood of relapsing or quitting,  
48 males showed an association between an increase in stress from 2007 to 2009 and odds of  
49 relapse (2.82; 1.17, 3.30). Additional adjustments for a change in stress among the risk of relapse  
50 did not significantly alter the effect sizes.  
51  
52  
53

54  
55 Though stress change did not predict a relapse in females, further examination of changes in  
56 stress levels among smoking status, displayed a significant change in mean stress levels (SD)  
57  
58  
59  
60



1  
2  
3 among females that had relapsed, with a significant increase in stress scores from 3.96 (2.52) in  
4 2007 to 5.24 (3.46) (P 0.01; F = 7.67).  
5  
6  
7

## 8 9 **Discussion**

10  
11 In response to the severe economic collapse in Iceland, we found that the prevalence of smoking  
12 continued to decrease for both genders in the short period after. This drop in smoking may be  
13 attributed to background secular trends,<sup>15</sup> while other factors, such as changes in the price of  
14 cigarettes, change of priorities in the favour of more health promoting behaviours or anti-  
15 smoking campaigns, may also play a role. The strength of our study is that we were able to  
16 document changes in individual economic status – as well as perceived stress – straddling the  
17 economic downturn and link these exposures to individual changes in smoking habits.  
18 Additionally, in comparison to national smoking rates (2007: 23.0% of population; 2009: 19.0%)  
19 the prevalence rates from 2007 to 2009 of this sample are relatively analogous – offering support  
20 for the generalizability of the sample.  
21  
22  
23  
24

25  
26 Our findings partially corroborate previous research on the pro-cyclical nature of the association  
27 between economic downturns and smoking habit, i.e. during recessions, smoking habits may be  
28 dampened. Among male former smokers, those who experienced a decline in income during the  
29 economic recession had a significantly lower risk of relapse two years later. Conversely, among  
30 men whose incomes or stress levels increased during the period of recession, their risk of relapse  
31 was considerably higher compared to those whose incomes stayed the same. Although the  
32 direction of associations was similar among women, none of the estimates were statistically  
33 significant.  
34  
35  
36

37  
38 Taken together, the main significant finding of our analyses is that male former smokers whose  
39 incomes fell during the period of the economic collapse experienced a reduced risk of relapse.  
40 Ruhm hypothesized that this risk reduction is possibly driven by a tendency to adopt healthier  
41 behaviours during periods of reduced income – driven by an increase in positive health  
42 behaviours (i.e. exercise) that accompanies newly acquired increased leisure time during  
43 economic contractions.<sup>16</sup> It could also be argued their behaviour change in a recession can be  
44 either intentional or inadvertent. When facing enforced economic inactivity – individuals may  
45 choose to fill their time by actively investing in positive personal health changes, which include  
46 stopping smoking or joining a fitness club. It is equally plausible that a drop in income  
47 involuntarily forces smokers to give up their habit. However, our results did not indicate an  
48 increased risk of quitting among those whose incomes fell, which is not consistent with the latter  
49 hypothesis.  
50  
51  
52  
53

54  
55 Foremost, our findings support Ruhm's theory of the positive effects of recessions on a  
56 population's health behaviours. Error! Bookmark not defined. Ruhm revealed an association between  
57 markers (e.g. unemployment) of economic downturns and reductions in smoking, with an  
58  
59  
60

1  
2  
3 increase being seen during economic expansion. Though tobacco products are likely to be  
4 procyclical goods, as Ruhm further points out, offering some explanation of the decrease we  
5 observed, it does not explain all of the mechanisms involved.  
6  
7

8 We caution that our findings regarding recession, income change, and smoking habits cannot be  
9 generalized to other health outcomes. For example, observational reports found a spike in female  
10 cardiac emergency visits during the week corresponding to the economic collapse in October of  
11 2008.<sup>3</sup> In accordance with this, our previous analysis on changes in mental health revealed  
12 significant increases in stress for mainly women.<sup>4</sup> This increase in stress for women, however  
13 threatening of related health outcomes, did not prove to be associated with an increased  
14 likelihood of relapsing.  
15  
16  
17

18 Our findings are also congruent with multiple models explaining the link between stress levels  
19 and smoking behaviour. Though much research shows stress as a cause of smoking,<sup>17 18</sup>  
20 additional research actually points to cigarette smoking as a cause of stress and, furthermore,  
21 smoking cessation as leading to a reduction in stress.<sup>19</sup> This is in line with our findings, as both  
22 male and female relapsed smokers had the lowest levels of stress before the collapse when they  
23 considered themselves as having quit smoking in 2007 (table 4), yet experienced an increase in  
24 stress post-collapse—significantly for women. This may also point to a vulnerability of this  
25 group to use smoking as a means of alleviating stress—explaining their relapse in smoking after  
26 the collapse.<sup>20</sup> This vulnerability has been discussed and supported by previous research showing  
27 economic stress as a cause of adverse mental health.<sup>21</sup> This increased stress may have also been  
28 amplified by a return to smoking, as Cohen & Lichtenstein have found.<sup>22</sup> Caution is warranted in  
29 interpreting the findings on stress, however, since smokers may be citing an increase in  
30 perceived stress to justify their relapse or failure to quit.  
31  
32  
33  
34  
35  
36

### 37 **Study limitations**

38  
39 Some limitations of our study should be noted. Relapsed smokers and quitters represent a small  
40 proportion of the population, and hence our odds ratios were estimated with imprecision.  
41 Similarly, we lacked statistical power to directly examine the effects of a change in employment  
42 status on change in smoking habits. In other words, though we were able to examine the effects  
43 of income change, we were not able to directly estimate the effects of unemployment as there  
44 were too few individuals in the sample who lost their jobs between 2007 and 2009. Finally,  
45 smoking status was based on self-report only, and not validated by biomarkers such as cotinine.  
46 This may have produced misclassification of the outcome, though it is not clear whether this  
47 misclassification was differential by exposure status (e.g. income changes).  
48  
49  
50  
51

### 52 **Conclusions**

53  
54 Our large population-based cohort with assessment points straddling the 2008 economic crisis in  
55 Iceland revealed a reduction in smoking rates from the short periods before and after the start of  
56 the crisis - though our study could not disentangle the direct effects of the crisis with other  
57  
58  
59  
60

1  
2  
3 mechanisms, e.g. secular trends, changing cigarette prices. Chiefly, this examination revealed a  
4 decisive role of income change and perceived stress on the risk relapsing after the collapse  
5 among former male smokers.  
6  
7  
8  
9  
10  
11  
12  
13  
14  
15  
16  
17  
18  
19  
20  
21  
22  
23  
24  
25  
26  
27  
28  
29  
30  
31  
32  
33  
34  
35  
36  
37  
38  
39  
40  
41  
42  
43  
44  
45  
46  
47  
48  
49  
50  
51  
52  
53  
54  
55  
56  
57  
58  
59  
60

For peer review only

## Notes

**Contributors:** CM and IK (study guarantor) were responsible for the design of the study and preparation of the manuscript. CM conducted data analyses. AH and UV obtained funding. All contributors interpreted the data, contributed to the writing of the paper and approved the final version of the manuscript.

**Funding:** The project was funded in part by the Icelandic Centre for Research (RANNÍS). The authors are responsible for the manuscript's content, not the funding bodies.

**Competing interests:** All authors have completed the Unified Competing Interest form at [www.icmje.org/coi\\_disclosure.pdf](http://www.icmje.org/coi_disclosure.pdf) (available on request from the corresponding author) and declare: no other authors had financial relationships with any organisations that might have an interest in the submitted work in the previous 3 years.

**Ethical approval:** The study was approved by the Ethics Review Board of Iceland (09-094) and the Data Protection Authority of Iceland (S4455).

**Data sharing:** No additional data available.

## Figures and Tables

Figure 1- The cohort of the “Health and well-being”-study.

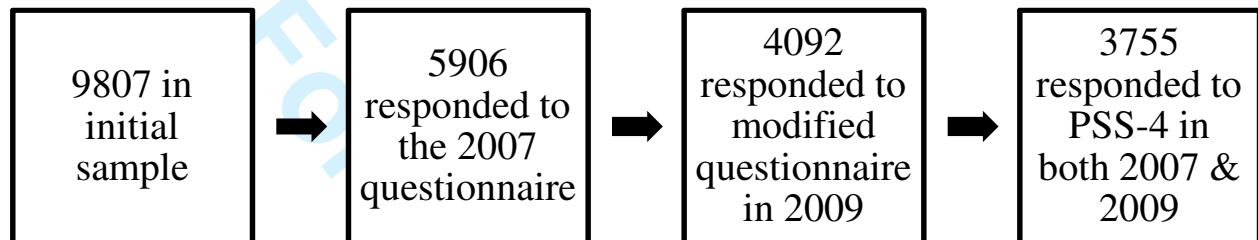

Table 1 – Baseline characteristics (in 2007) of the cohort and among differential smoking status

|                           | Cohort       | Relapsed in 2009 | Quit Smoking in 2009 |
|---------------------------|--------------|------------------|----------------------|
| n                         | 3755         | 56               | 160                  |
| Age Mean ± SD             | 52.3 ± 16.0  | 45.7 ± 14.2      | 47.4 ± 15.5          |
| <b>Sex</b>                | <b>n (%)</b> |                  |                      |
| Male                      | 1763 (47.0)  | 31 (55.4)        | 82 (51.3)            |
| Female                    | 1992 (53.0)  | 25 (44.6)        | 78 (48.8)            |
| <b>Marital status</b>     |              |                  |                      |
| Single/Divorced           | 556 (14.9)   | 7 (12.5)         | 31 (19.4)            |
| Committed, not cohabiting | 131 (3.5)    | 2 (3.6)          | 9 (5.6)              |
| Married, cohabiting       | 2871 (76.7)  | 45 (80.4)        | 116 (72.5)           |
| <b>Education</b>          |              |                  |                      |
| Basic                     | 1688 (47.1)  | 22 (40.7)        | 65 (42.5)            |
| Middle                    | 971 (27.1)   | 15 (27.8)        | 51 (33.3)            |
| University                | 928 (25.9)   | 17 (31.5)        | 37 (24.2)            |
| <b>Employment status</b>  |              |                  |                      |
| Employed                  | 2019 (58.4)  | 37 (71.2)        | 98 (64.5)            |
| Unemployed                | 169 (4.9)    | 3 (5.8)          | 10 (6.6)             |
| Student                   | 122 (3.5)    | 1 (1.9)          | 5 (3.3)              |
| Homemaker/Paternal Leave  | 159 (4.6)    | 2 (3.8)          | 9 (5.9)              |
| Retired                   | 872 (25.2)   | 4 (7.7)          | 24 (15.8)            |
| Disabled                  | 119 (3.4)    | 5 (9.6)          | 6 (3.9)              |
| <b>Household income</b>   |              |                  |                      |
| Low                       | 621 (20.6)   | 8 (17.0)         | 22 (16.5)            |

|        |             |           |           |
|--------|-------------|-----------|-----------|
| Middle | 1855 (61.4) | 25 (53.2) | 80 (60.2) |
| High   | 543 (18.0)  | 14 (29.8) | 31 (23.3) |

Table 2 – The ratio of odds of relapsing in 2009 among those who had quit smoking at the baseline (2007)

|                                   |                           | OR (95% CI) a |                   |                    | OR (95% CI) c      |                   |                    |                    |
|-----------------------------------|---------------------------|---------------|-------------------|--------------------|--------------------|-------------------|--------------------|--------------------|
|                                   |                           | Overall       | Male              | Female             | Overall            | Male              | Female             |                    |
| <b>Age</b>                        | <b>n</b>                  |               | Ref               | 0.64 (0.36, 1.15)  |                    | Ref               | 0.62 (0.35, 1.12)  |                    |
|                                   | 18-29                     | 9             | 3.79 (1.47, 9.76) | 1.64 (0.18, 14.85) | 3.70 (1.21, 11.27) | 3.51 (1.34, 9.19) | 1.41 (0.15, 13.33) | 3.58 (1.16, 11.02) |
|                                   | 30-39                     | 13            | 1.62 (0.75, 3.53) | 2.89 (1.07, 7.82)  | 0.75 (0.22, 2.61)  | 1.61 (0.74, 3.51) | 3.07 (1.12, 8.43)  | 0.75 (0.21, 2.60)  |
|                                   | 40-49                     | 8             | 0.71 (0.30, 1.69) | 1.23 (0.43, 3.52)  | 0.28 (0.06, 1.37)  | 0.71 (0.30, 1.69) | 1.20 (0.41, 3.46)  | 0.29 (0.06, 1.40)  |
|                                   | 50-59                     | 18            | Ref               | Ref                | Ref                | Ref               | Ref                | Ref                |
|                                   | 60-69                     | 6             | 0.30 (0.12, 0.76) | 0.33 (0.10, 1.09)  | 0.26 (0.05, 1.28)  | 0.31 (0.12, 0.79) | 0.35 (0.10, 1.14)  | 0.27 (0.06, 1.34)  |
|                                   | >70                       | 2             | 0.14 (0.03, 0.62) | 0.11 (0.14, 0.32)  | 0.24 (0.03, 2.02)  | 0.15 (0.03, 0.64) | 0.11 (0.01, 0.87)  | 0.25 (0.03, 2.10)  |
| <b>Marital Status</b>             |                           |               |                   |                    |                    |                   |                    |                    |
|                                   | Single/Divorced           | 8             | 1.03 (0.41, 2.56) | 0.80 (0.18, 3.60)  | 1.28 (0.40, 4.07)  | 0.99 (0.39, 2.49) | 0.70 (0.15, 3.37)  | 1.26 (0.39, 4.05)  |
|                                   | Committed, not cohabiting | 2             | 0.99 (0.21, 4.61) | 0.84 (0.09, 7.74)  | 1.14 (0.14, 9.57)  | 0.94 (0.20, 4.39) | 0.86 (0.09, 7.68)  | 1.04 (0.12, 8.98)  |
|                                   | Married/Cohabiting        | 44            | Ref               | Ref                | Ref                | Ref               | Ref                | Ref                |
| <b>Education</b>                  |                           |               |                   |                    |                    |                   |                    |                    |
|                                   | Basic                     | 22            | Ref               | Ref                | Ref                | Ref               | Ref                | Ref                |
|                                   | Middle                    | 15            | 0.81 (0.48, 1.37) | 0.89 (0.47, 1.71)  | 0.68 (0.28, 1.68)  | 0.95 (0.47, 1.90) | 0.87 (0.35, 2.17)  | 1.10 (0.37, 3.28)  |
|                                   | University                | 17            | 1.11 (0.70, 1.76) | 1.03 (0.55, 1.95)  | 1.22 (0.66, 2.39)  | 1.09 (0.56, 2.15) | 0.98 (0.38, 2.52)  | 1.21 (0.45, 3.26)  |
| <b>Employment status in 2009</b>  |                           |               |                   |                    |                    |                   |                    |                    |
|                                   | Employed                  | 37            | Ref               | Ref                | Ref                | Ref               | Ref                | Ref                |
|                                   | Unemployed                | 3             | 1.32 (0.54, 3.20) | 1.50 (0.48, 4.70)  | 1.06 (0.23, 4.83)  | 1.05 (0.29, 3.86) | 1.51 (0.29, 7.98)  | 0.69 (0.08, 6.39)  |
|                                   | Student                   | 1             | 0.64 (0.15, 2.73) | ^                  | 1.92 (0.41, 9.01)  | 0.65 (0.08, 5.09) | ^                  | 1.74 (0.20, 15.36) |
|                                   | Homemaker/Parental Leave  | 2             | 1.01 (0.35, 2.90) | 0.67 (0.15, 2.94)  | 2.20 (0.47, 10.26) | 0.86 (0.19, 3.89) | 0.58 (0.07, 4.80)  | 1.74 (0.20, 15.45) |
|                                   | Disabled                  | 4             | 0.47 (0.20, 1.13) | 0.13 (0.03, 0.62)  | 2.73 (0.72, 10.26) | 0.48 (0.14, 1.65) | 0.14 (0.02, 1.24)  | 2.49 (0.39, 15.80) |
|                                   | Retired                   | 5             | 2.74 (1.26, 5.96) | 0.86 (0.18, 4.06)  | 5.30 (2.01, 13.98) | 2.91 (0.97, 8.74) | 0.87 (0.10, 7.89)  | 6.03 (1.55, 23.41) |
| <b>Household income in 2009 b</b> |                           |               |                   |                    |                    |                   |                    |                    |
|                                   | Low                       | 8             | 0.69 (0.36, 1.32) | 1.02 (0.37, 2.81)  | 0.54 (0.23, 1.29)  | 0.69 (0.28, 1.70) | 1.29 (0.27, 6.04)  | 0.40 (0.12, 1.35)  |
|                                   | Middle                    | 25            | 1.36 (0.65, 2.83) | 3.26 (1.11, 9.61)  | 0.39 (0.11, 1.35)  | 1.43 (0.52, 3.93) | 3.41 (0.68, 17.19) | 0.66 (0.14, 3.25)  |

|                                                                             |                      |    |                    |                    |                    |                   |                    |                    |
|-----------------------------------------------------------------------------|----------------------|----|--------------------|--------------------|--------------------|-------------------|--------------------|--------------------|
|                                                                             | High                 | 14 | Ref                | Ref                | Ref                | Ref               | Ref                | Ref                |
| <b>Household income in 2009 (among high income at baseline)<sup>b</sup></b> |                      |    |                    |                    |                    |                   |                    |                    |
|                                                                             | High income in 2009  | 28 | Ref                | Ref                | Ref                | Ref               | Ref                | Ref                |
|                                                                             | Lower income in 2009 | 16 | 0.41 (0.20, 0.86)  | 0.23 (0.08, 0.62)  | 0.85 (0.24, 2.96)  | 0.52 (0.25, 1.05) | 0.36 (0.14, 0.91)  | 0.76 (0.21, 2.76)  |
| <b>Household income in 2009 (among low income at baseline)<sup>b</sup></b>  |                      |    |                    |                    |                    |                   |                    |                    |
|                                                                             | High income in 2009  | 23 | 3.80 (1.43, 10.12) | 6.53 (1.58, 26.95) | 2.71 (0.64, 11.48) | 3.44 (1.30, 9.12) | 4.73 (1.16, 19.24) | 3.22 (0.69, 15.06) |
|                                                                             | Lower income in 2009 | 7  | Ref                | Ref                | Ref                | Ref               | Ref                | Ref                |
| <b>Change in stress from 2007 to 2009</b>                                   |                      |    |                    |                    |                    |                   |                    |                    |
|                                                                             | Same                 | 7  | Ref                | Ref                | Ref                |                   |                    |                    |
|                                                                             | Decreased            | 15 | 0.95 (0.47, 1.90)  | 1.51 (0.58, 3.92)  | 0.67 (0.24, 1.90)  |                   |                    |                    |
|                                                                             | Increased            | 34 | 2.08 (1.32, 3.30)  | 2.82 (1.17, 6.83)  | 1.65 (0.67, 4.08)  |                   |                    |                    |

<sup>a</sup> Estimates not possible

a OR adjusted for statuses in 2009: age, sex, education, marital status

b OR adjusted for statuses in 2009: age, sex, education, marital status, adults in household

c OR additionally adjusted for change in stress from 2007 to 2009.

Table 3 - The ratio of odds of smoking cessation in 2009 among those who were smokers at the baseline (2007)

|                                                                             |                                                                            | OR (95% CI) <sup>a</sup> |                   |                    |                    |
|-----------------------------------------------------------------------------|----------------------------------------------------------------------------|--------------------------|-------------------|--------------------|--------------------|
|                                                                             |                                                                            | Overall                  | Male              | Female             |                    |
|                                                                             |                                                                            |                          | Ref               | 0.67 (0.52, 0.87)  |                    |
|                                                                             |                                                                            | n                        |                   |                    |                    |
| <b>Age</b>                                                                  | 18-29                                                                      | 24                       | 2.58 (1.31, 5.09) | 1.37 (0.43, 4.33)  | 3.83 (1.51, 9.72)  |
|                                                                             | 30-39                                                                      | 32                       | 1.80 (0.98, 3.30) | 1.35 (0.59, 3.09)  | 2.28 (0.90, 5.76)  |
|                                                                             | 40-49                                                                      | 34                       | 1.49 (0.83, 2.67) | 1.17 (0.54, 2.56)  | 2.00 (0.81, 4.94)  |
|                                                                             | 50-59                                                                      | 28                       | Ref               | Ref                | Ref                |
|                                                                             | 60-69                                                                      | 24                       | 1.63 (0.85, 3.13) | 1.17 (0.48, 2.86)  | 2.75 (1.02, 7.46)  |
|                                                                             | >70                                                                        | 18                       | 2.60 (1.26, 5.38) | 1.87 (0.73, 4.79)  | 4.72 (1.47, 15.12) |
|                                                                             | <b>Marital status</b>                                                      | Single/Divorced          | 31                | 0.72 (0.46, 1.15)  | 0.88 (0.46, 1.69)  |
| Committed, not cohabiting                                                   |                                                                            | 9                        | 1.02 (0.45, 2.31) | 2.77 (0.73, 10.55) | 0.49 (0.15, 1.16)  |
| Married/Cohabiting                                                          |                                                                            | 116                      | Ref               | Ref                | Ref                |
| <b>Education</b>                                                            | Basic                                                                      | 65                       | Ref               | Ref                | Ref                |
|                                                                             | Middle                                                                     | 51                       | 1.25 (0.91, 1.72) | 0.73 (0.45, 1.17)  | 2.16 (1.38, 3.39)  |
|                                                                             | University                                                                 | 37                       | 1.44 (1.03, 2.01) | 0.79 (0.48, 1.31)  | 2.50 (1.55, 4.01)  |
| <b>Employment status in 2009</b>                                            | Employed                                                                   | 98                       | Ref               | Ref                | Ref                |
|                                                                             | Unemployed                                                                 | 10                       | 0.79 (0.45, 1.38) | 0.56 (0.27, 1.18)  | 1.41 (0.59, 3.36)  |
|                                                                             | Student                                                                    | 5                        | 1.06 (0.51, 2.23) | ^                  | 1.49 (0.67, 3.30)  |
|                                                                             | Homemaker/Parental Leave                                                   | 9                        | 0.66 (0.37, 1.17) | 0.99 (0.41, 2.40)  | 0.58 (0.26, 1.28)  |
|                                                                             | Disabled                                                                   | 24                       | 1.84 (1.10, 3.09) | 0.88 (0.42, 1.84)  | 4.73 (2.20, 10.14) |
|                                                                             | Retired                                                                    | 6                        | 0.97 (0.48, 1.97) | 2.47 (0.76, 8.03)  | 0.54 (0.21, 1.42)  |
|                                                                             | <b>Household income in 2009**</b>                                          | Low                      | 22                | 1.16 (0.75, 1.80)  | 1.17 (0.59, 2.32)  |
| Middle                                                                      |                                                                            | 80                       | 1.50 (0.87, 2.57) | 1.59 (0.70, 3.60)  | 1.36 (0.65, 2.86)  |
| High                                                                        |                                                                            | 31                       | Ref               | Ref                | Ref                |
| <b>Household income in 2009 (among high income at baseline)<sup>b</sup></b> |                                                                            | High income in 2009      | 96                | Ref                | Ref                |
|                                                                             | Low income in 2009                                                         | 32                       | 0.87 (0.50, 1.49) | 0.71 (0.33, 1.53)  | 1.09 (0.49, 2.42)  |
|                                                                             | <b>Household income in 2009 (among low income at baseline)<sup>b</sup></b> | High income in 2009      | 89                | 0.61 (0.26, 1.46)  | 0.75 (0.22, 2.51)  |
| Low income in 2009                                                          |                                                                            | 8                        | Ref               | Ref                | Ref                |
| <b>Change in stress from 2007 to 2009</b>                                   |                                                                            | Same                     | 22                | Ref                | Ref                |
|                                                                             | Decreased                                                                  | 62                       | 0.86 (0.57, 1.28) | 1.34 (0.77, 2.33)  | 1.05 (0.57, 1.93)  |



|           |    |                   |                   |                   |
|-----------|----|-------------------|-------------------|-------------------|
| Increased | 76 | 1.04 (0.78, 1.38) | 0.83 (0.47, 1.45) | 1.52 (0.85, 2.71) |
|-----------|----|-------------------|-------------------|-------------------|

^ Estimates not possible

a OR adjusted for statuses in 2009: age, sex, education, marital status

b OR adjusted for statuses in 2009: age, sex, education, marital status, adults in household

Table 4 – Average stress levels according to smoking status – among waves (2007 & 2009)

|                     | 2007             | 2009             |               |
|---------------------|------------------|------------------|---------------|
|                     | Stress Mean (SD) | Stress Mean (SD) | p-value (F) ± |
| <b>Never smoker</b> |                  |                  |               |
| Male                | 3.70 (2.75)      | 3.83 (2.69)      | 0.31 (1.02)   |
| Female              | 4.18 (2.70)      | 4.40 (2.90)      | 0.44 (0.60)   |
| <b>Relapsed</b>     |                  |                  |               |
| Male                | 3.52 (2.28)      | 4.94 (2.80)      | 0.28 (1.20)   |
| Female              | 3.96 (2.52)      | 5.24 (3.46)      | 0.01 (7.67)   |
| <b>Quit smoking</b> |                  |                  |               |
| Male                | 4.21 (2.71)      | 4.16 (2.78)      | 0.91 (0.01)   |
| Female              | 4.38 (3.49)      | 5.03 (3.35)      | 0.13 (2.31)   |

\* Prevalence rates compared using chi-squared tests

± Repeated measures ANOVA (p-values, F statistic) used to examine overall and gender-specific mean differences in stress levels from 2007 to 2009; adjusted for age in 2009

## References

- 1 Wade RG, Sigurgeirsdottir S. Iceland's rise, fall, stabilisation and beyond. *Cambridge Journal of Economics* 2012;36:127-144.
- 2 Vaiman V, Sigurjonsson TO, Davidsson PA. Weak business culture as antecedents of economic crisis: the case of Iceland. *J Business Ethics* 2011;98(2).
- 3 Gudjonsdottir GR, Kristjansson M, Olafsson O, Arna DO, Getz L, Sigurdsson JA, Gudmundsson S, Valdimarsdottir U. Immediate surge in female visits to the cardiac emergency department following the economic collapse in Iceland: an observational study. *Emerg Med J* 2011. doi:10.1136/emmermed-2011-200518
- 4 Hauksdóttir A, McClure C, Jónsson SH, Ólafsson Ö, Valdimarsdóttir U. Increased stress levels in women following an economic collapse. *Submitted* 2011.
- 5 Brenner HM. Relation of economic change to Swedish health and social well-being, 1950–1980. *Social Science & Medicine*. 1987;25(2):183–95.
- 6 Tapias Granados JA. Increasing mortality during the expansions of the US economy, 1900–1996. *Int J Epidemiol* 2005;34(6):1194–202.
- 7 Tapias Granados JA. Macroeconomic fluctuations and mortality in postwar Japan. *Demography* 2008;45(2):323–43.
- 8 Tapias Granados JA, Diez Roux AV. Life and death during the Great Depression. *PNAS* 2009;106(41):17290–5.
- 9 Stuckler D, Basu S, Suhrcke M, Coutts A, McKee M. The public health effect of economic crises and alternative policy responses in Europe: an empirical analysis. *Lancet* 2009;374: 315-323.
- 10 Khang Y-H, Lynch JW, Kaplan GA. Impact of economic crisis on cause-specific mortality in South Korea. *Int J Epidemiol* 2005;34(6):1291–1301.
- 11 Ruhm CJ. Good times make you sick. *Journal of Health Economics* 2003;22:637-658.
- 12 Ruhm CJ. Are recessions good for your health? *Q J Econ* 2000;115(2):617-650.
- 13 Cohen S, Kamarck T, Mermelstein R. A global measure of perceived stress. *J Health Soc Behav* 1983;24(4):385-396.
- 14 Cohen S, Williamson G. Perceived stress in a probability sample of the United States. In S. Spacapan S & Oskamp S (Eds.), *The social psychology of health: Claremont Symposium on applied social psychology* 1988. Newbury Park, CA: Sage.
- 15 Statistics Iceland. Lifestyle and health [Internet]. [cited 2012 Mar 22]. Available from: <http://www.statice.is/Statistics/Health,-social-affairs-and-justi/Lifestyle-and-health>
- 16 Ruhm CJ. Healthy living in hard times. *Journal of Health Economics* 2005;24(2):341–63.
- 17 Childs E, de Wit H. Effects of acute psychosocial stress on cigarette craving and smoking. *Nicotine Tob Res* 2010;12(4):449-453.
- 18 Tsourtos G, Ward PR, Muller R, Lawn S, Winefield AH, Hersh D, Coverney J. The importance of resilience and stress to maintaining smoking abstinence and cessation: a qualitative study in Australia with people diagnosed with depression. *Health & Social Care in the Community* 2011;19(3):299-306.
- 19 Parrott A. Does cigarette smoking cause stress? *American Psychologist* 1999;54(10):817-820.
- 20 Perkins KA, Grobe JE. Increased desire to smoke during acute stress. *British Journal of Addiction* 1992;87(7):1037-1040.
- 21 Aldwin CM, Revenson T. Vulnerability to economic stress. *Am J Community Psychology* 1986;14(2):161-175.
- 22 Cohen S, Lichtenstein E. Perceived stress, quitting smoking, and smoking relapse. *Health Psychol* 1990;9:466-478.



## Economic crisis and smoking behaviour: Prospective cohort study in Iceland

|                                 |                                                                                                                                                                                                                                                                                                                                                                                                                        |
|---------------------------------|------------------------------------------------------------------------------------------------------------------------------------------------------------------------------------------------------------------------------------------------------------------------------------------------------------------------------------------------------------------------------------------------------------------------|
| Journal:                        | <i>BMJ Open</i>                                                                                                                                                                                                                                                                                                                                                                                                        |
| Manuscript ID:                  | bmjopen-2012-001386.R1                                                                                                                                                                                                                                                                                                                                                                                                 |
| Article Type:                   | Research                                                                                                                                                                                                                                                                                                                                                                                                               |
| Date Submitted by the Author:   | 12-Jul-2012                                                                                                                                                                                                                                                                                                                                                                                                            |
| Complete List of Authors:       | McClure, Christopher; Centre of Public Health Sciences, University of Iceland, Department of Medicine<br>Valdimarsdttir, Unnur; Centre of Public Health Sciences, University of Iceland, Department of Medicine<br>Hauksdóttir, Arna; Centre of Public Health Sciences, University of Iceland, Department of Medicine<br>Kawachi, Ichiro; Harvard School of Public Health, Department of Society Human Development and |
| <b>Primary Subject Heading</b>: | Smoking and tobacco                                                                                                                                                                                                                                                                                                                                                                                                    |
| Secondary Subject Heading:      | Public health, Epidemiology, Mental health, Health economics, Addiction                                                                                                                                                                                                                                                                                                                                                |
| Keywords:                       | PUBLIC HEALTH, Adult psychiatry < PSYCHIATRY, EPIDEMIOLOGY, MENTAL HEALTH, Health economics < HEALTH SERVICES ADMINISTRATION & MANAGEMENT                                                                                                                                                                                                                                                                              |
|                                 |                                                                                                                                                                                                                                                                                                                                                                                                                        |

SCHOLARONE™  
Manuscripts

only

# Economic crisis and smoking behaviour: Prospective cohort study in Iceland

Christopher B. McClure, *doctoral student*,<sup>1</sup> Unnur A. Valdimarsdóttir, *associate professor and chair*,<sup>1</sup> Arna Hauksdóttir, *assistant professor*<sup>1</sup>, Ichiro Kawachi, *associate professor and chair*<sup>2</sup>

1. Centre of Public Health Sciences, University of Iceland, Stapi on Hringbraut, 101 Reykjavik, Iceland
2. Department of Society, Human Development, and Health, Harvard School of Public Health, 677 Huntington Avenue, Kresge Building 7th Floor, Boston, Massachusetts 02115, USA

**Correspondence to:** C McClure [cbm1@hi.is](mailto:cbm1@hi.is)

“The Corresponding Author has the right to grant on behalf of all authors and does grant on behalf of all authors, a worldwide licence to the Publishers and its licensees in perpetuity, in all forms, formats and media (whether known now or created in the future), to i) publish, reproduce, distribute, display and store the Contribution, ii) translate the Contribution into other languages, create adaptations, reprints, include within collections and create summaries, extracts and/or, abstracts of the Contribution, iii) create any other derivative work(s) based on the Contribution, iv) to exploit all subsidiary rights in the Contribution, v) the inclusion of electronic links from the Contribution to third party material where-ever it may be located; and, vi) licence any third party to do any or all of the above.”

## Abstract

**Objective** To determine whether the strains of a national economic collapse affect smoking ~~cessation~~ cessation and risk of smoking relapse in the population.

**Design** A population-based, prospective cohort study based on a mail survey (*Health and Wellbeing in Iceland*) assessed in 2007 and 2009.

**Setting** National mail survey

**Participants** Representative cohort (n=3755) of Icelandic adults.

**Main outcome measure** Smoking status.

**Results** A significant reduction in the prevalence of smoking was observed from 2007 (pre-economic collapse) to 2009 (post-collapse) in both males (17.4% to 14.8%; P 0.01) and females (20.0% to 17.5%; P 0.01) in the cohort (n= 3755). An ~~increase in perceived stress levels from pre- to post-collapse was associated with the risk of smoking relapse (odds ratio 2.08; 95% confidence interval 1.32, 3.30), as was an~~ increase in income from pre- to post-collapse among males (~~Odds ratio~~ R 6.534.02; 95% ~~CI confidence interval~~ 1.58, 26.951.15, 14.00) was strongly associated with an increased risk of relapse. Conversely, male former smokers experiencing a reduction in income were less likely to relapse (OR 0.~~2337~~; 95% CI 0.~~08, 0.6216, 0.85~~). Regarding the propensity of pre-collapse smokers to quit in the period after the collapse, female smokers were less likely to quit compared to males (OR 0.~~6765~~; 95% CI 0.~~5245, 0.8793~~).

**Conclusions** In line with on-going secular trend, the overall prevalence of smoking continued to decrease following the 2008 economic crisis in Iceland. ~~Increase in psychological stress and income~~ Income increase during the period 2007-2009 ~~were was~~ strongly associated with having relapsed in 2009, particularly among men, ~~offering support for a pro-cyclical association between smoking and income.~~

## Article Summary

### Article Focus

- ◆ An examination on the association between economic crises and smoking behaviours, i.e. is a change in income related to a change in smoking status?
- ◆ What is the role of stress change on an individual's propensity to relapse or quit smoking?

### Key Messages

- ◆ Evidence for the association between increased income and increased risk of smoking relapse following an economic collapse.
- ◆ Evidence for an association between decreased income and decreased risk of relapse.
- ◆ Gender differences in smoking—represented by higher female prevalence rates and decreased likelihood of quitting for females compared to males.

**Strengths and limitations of this study**

- ◆ A representative prospective cohort study assessed at two time points, which straddle the start of a severe economic crisis.
- ◆ Due to the low number of individuals that change their smoking behaviours in a short period, we were unable to assess the effects of an unemployment change on smoking habits.

For peer review only

## Introduction

The Icelandic economy was severely affected by the global economic collapse of 2008. After a decade-long period of financial prosperity the nation was plunged into a recession of such severity that similar contractions had only been seen a handful of times before.<sup>1 2</sup>

Previous research on the health consequences of the Icelandic economic collapse has suggested adverse impacts on cardiovascular and mental health among women.<sup>3 4</sup> In the broader literature on economic crises and population health, however, it has been debated whether health moves in a pro-cyclical or counter-cyclical direction to macro-economic conditions. The work of Brenner beginning in the 1970s suggested that mortality is counter-cyclical, i.e. when the economy is down, mortality rates – in particular, suicides – rise.<sup>5</sup> However, in more recent years, a series of econometric studies have suggested that mortality is pro-cyclical, i.e. during economic contractions death rates decline.<sup>6 7 8 9</sup> There are plausible reasons for this unexpected finding – for instance, during the 1998 Korean financial crisis, economic activity was so depressed that there was a detectable decline in traffic-related mortality.<sup>10</sup> Others have speculated – without direct evidence – that people are more likely to be over-worked and “stressed” during economic booms than during busts, having less time flexibility to engage in health promoting behaviours.<sup>11 12</sup>

Few studies, however, have used individual-level data to test the association between recession and health, especially smoking. Most of the evidence to date has been at the ecological level, though not all.<sup>13</sup> For instance, Shaw et al. found a direct association between economic hardship and a propensity to smoke.<sup>14</sup> Using U.S. data, Ruhm previously reported that economic recession was associated with a decline in the prevalence of cigarette smoking.<sup>12</sup> A recent report from Gallus et al. found that the recent economic contraction in Italy has given rise to an increase in the percentage of current smokers – primarily for females.<sup>15</sup> In the present study, we took advantage of the natural experiment afforded by the Icelandic crisis to examine the relationship between changes in economic conditions and smoking behaviour. Utilizing a prospective cohort of Icelandic adults assessed before (in 2007) and after the start of the collapse (in 2009), we sought to examine the risk of relapse among pre-collapse former smokers, as well as quitting behaviour among current smokers in terms of economic changes. Furthermore, because of the important role of perceived stress on smoking status, we sought to examine the potential influence of stress on the studied association~~this role~~.<sup>16 17</sup>

## Methods

### Design and Samples

### Cohort

Our cohort is based on the *Health and Wellbeing in Iceland* health survey. Data was collected by a questionnaire in two waves: (1) from October to December of 2007 (10-12 months pre-collapse), then again (2) between November and December of 2009 (13-14 months post-collapse). The cohort was based on a stratified random sample of the Icelandic population (n=9807), which was selected from 12 strata: consisting of two geographic regions further stratified by six age groups. Of the initial 9807, a total of 5918 responded to the initial 2007 assessment (response rate of 60.3%), with 4092 responding again to the modified version of the survey in 2009 (response rate of 82.8% of those who responded to the pre-collapse baseline survey). Because of the importance of stress as a potential predictor of smoking behaviour, we excluded individuals who did not have complete responses to the *Perceived Stress Scale* in both 2007 and 2009. This left a final analytical sample of n=3755. Figure 1 shows the cohort attrition over questionnaire waves.

## Measures

### *Smoking status and behaviour*

In the questionnaire, we inquired about smoking status, i.e. whether respondents were current smokers, had quit smoking, or had never smoked. In order to examine the likelihood of relapsing or quitting following an economic collapse, respondents were stratified according to their smoking status: non-smoker, relapsed, and quit smoking.

Non-smoker: An individual was classified as a non-smoker if they responded that they did not currently smoke on both the 2007 and 2009 assessments.

Relapsed smoker: An individual was identified as relapsed if they indicated that they (a) were a former smoker on the 2007 questionnaire, but indicated they had (b) smoked in any frequency in 2009. In our analyses estimating the odds ratios of relapse, the base population was restricted to individuals who were former smokers at baseline.

Quit smoking: A respondent that had quit smoking must have indicated that they were (a) currently smoking in 2007, yet had (b) quit smoking by 2009. In our analyses estimating the odds ratios of quitting, our base population was restricted to individuals who were current smokers at baseline.

### *Change in economic status*

Additional socio-economic questions pertained to employment and income status. ~~Employment status was categorized into either (1) employed or (2) unemployed.~~ Household income was classified into income ranges of (in terms of Icelandic currency; ISK) (1) low ( $\leq 3.4$  million ISK), (2) middle (3.5-9.4 million ISK), and (3) high ( $\geq 9.5$  million ISK); corresponding approximately to (1)  $\leq 28,000$  USD, (2) 28,000-77,000 USD, and (3)  $\geq 77,000$  USD. For analysis of income change, household income was further dichotomized into either high or “low”



(which combined the middle & low income categories). We examined two types of income change: a) drop in income between 2007 and 2009 from high to low; and b) a rise in income between 2007 and 2009 from low to high.

### *Change in perceived stress*

Psychological stress was measured in both 2007 and 2009 using the four-item Perceived Stress Scale (PSS-4).<sup>18</sup> The PSS-4 is a shortened, validated, and acceptable substitute for the original scale,<sup>19</sup> with scores ranging from 0-16; the higher the score, the higher the perceived stress. An increase in stress was classified as any increase from baseline to follow-up; conversely, a decrease was classified as any decrease from baseline to follow-up. For example, an individual with a score of 5 in 2007 and a score of 10 in 2009, would be classified as having an increase in stress.

### *Explanatory variables and demographics*

Our regression models controlled for the following socio-demographic covariates: age, sex, marital status, and education. Education was categorized as (1) basic (completed primary school or less), (2) middle (completed high school or equivalent), and (3) university (a completed university degree).

### **Statistical analyses**

Table 1 presents the distribution of socio-demographic characteristics according to change in smoking status between 2007 and 2009.

Binary logistic regression was used to estimate ~~ratio of odds~~ odds ratio (corresponding 95% confidence intervals) of relapse in 2009 (table 2), and the odds of quitting smoking in 2009 (table 3) by background characteristics, change in income and stress levels. Analyses were also stratified by gender. Models were adjusted for age, ~~sex, marital status, and educational level~~ and sex; models for household income and income change ~~odds~~ were additionally adjusted for ~~the number of adults in the household~~ baseline income levels. As previous research supports the role of stress as a mediator of an individual's propensity to ~~relapse~~ change smoking status,<sup>16 17 23</sup> we also ran models of relapse and cessation with and without the inclusion of (1) changes in stress levels between 2007 and 2009 and (2) baseline stress levels.

Repeated measures ANOVA (p-values, F statistic) was used to examine overall and gender-specific mean differences in stress levels from 2007 to 2009 (table 4). Statistical analyses were conducted with IBM SPSS Statistics version 19.0 (SPSS Inc, Chicago, Illinois). Statistical significance was set at the 0.05 level, and all tests were 2-tailed.

### **Results**

## Baseline characteristics

Table 1 describes the baseline characteristics of the cohort in 2007 (n=3755), which was 53.0% female, 76.7% married/cohabiting, and with a mean (SD) age of 52.3 (16.0). Table 1 also describes the characteristics of those that had relapsed and quit: 72.2% (n=2711) of the cohort were non-smokers, 4.0% (n=56) of the former smokers at baseline had relapsed in 2009, and 22.2% (n=149) of smokers at baseline had quit smoking in 2009. A significant reduction (p<0.01) in the prevalence of smokers was observed from 2007 to 2009 in both males (17.4% to 14.8%) and females (20.0% to 17.5%).

## Relapse smoking

Among individuals who were former smokers at baseline (table 2), ~~a decreased n increased risk odds~~ of relapsing in 2009 (after the collapse) ~~was were~~ observed in the ~~younger older~~ age groups (compared to those aged ~~50-59~~18-39), ~~specifically among females aged 18-29 (3.70; 1.21, 11.27) and males aged 30-39 (2.89; 1.07, 7.82) regardless of gender (age of 40-59: odds ratio 0.38; 95% confidence interval 0.21, 0.69 | age ≥ 60: 0.10; 0.04, 0.23). Further age stratification found that men over 70 years of age were significantly less likely to relapse (0.14; 0.03, 0.62).~~

While an individual's ~~change in~~ employment status ~~from 2007 to 2009~~ was not involved in ~~their~~ risk of relapsing, ~~males receiving disability pension (compared to the employed) were less likely to relapse (0.13; 0.03, 0.62), while~~ retired females showed ~~a~~ significant increased risk of relapsing (~~5.30; 2.01, 13.98~~4.12; 1.11, 15.29), compared to the employed.

Among men in the lower income groups at baseline (i.e. low, middle), those who moved into the high income group in 2009 experienced an increased risk of relapse (~~6.53; 1.58, 26.95~~4.02; 1.15, 14.00)—while among those in the high income group at baseline, those whose incomes dropped had a decreased risk of relapsing (~~2.82; 1.17, 6.83~~0.37; 0.16, 0.85). Further adjustments for a change in stress levels from 2007 to 2009, showed ~~some limited~~ attenuation in the coefficients, suggesting some mediation by perceived stress – i.e. former smokers whose incomes increased between 2007 and 2009 may have relapsed in part because of an increase in stress.

## Smoking cessation

~~Women-Females~~ were less likely to quit smoking in 2009 (~~0.6765; 0.5245, 0.8793~~), compared to males. An increased likelihood of quitting in 2009 was observed among the following female groups: those with middle (~~2.78; 1.48, 5.21~~2.16) or university-level (~~2.73; 1.38, 5.40~~2.50) education compared to a basic, and the disabled (~~3.42; 1.23, 9.52~~4.73) compared to the employed. Compared to ~~females aged 18-29~~aged 50-59, ~~females those in the middle-aged group~~youngest (~~3.83; 1.51, 9.72~~0.46; 0.26, 0.83) and oldest groups (~~4.72; 1.47, 15.12~~) were ~~considerably more less~~ likely to quit. Additional adjustments for a change in stress levels from baseline to follow-up in the cessation models revealed no diminished significance in effect sizes.

## Stress and smoking

~~With regard to the potential role of stress on an individual's likelihood of relapsing or quitting, males showed an association between an increase in stress from 2007 to 2009 and odds of relapse (2.82; 1.17, 3.30). Additional adjustments for a change in stress among the risk of relapse did not significantly alter the effect sizes.~~

Though stress change did not predict a relapse in females, further examination of changes in stress levels among smoking status, displayed a significant change in mean stress levels (SD) among females that had relapsed, with a significant increase in stress scores from 3.96 (2.52) in 2007 to 5.24 (3.46) (P 0.01; F = 7.67).

## Discussion

In response to the severe economic collapse in Iceland, we found that the prevalence of smoking continued to decrease for both genders in the short period after. This drop in smoking may be attributed to background secular trends,<sup>20</sup> while other factors, such as changes in the price of cigarettes, change of priorities in the favour of more health promoting behaviours or anti-smoking campaigns, may also play a role. The strength of our study is that we were able to document changes in individual economic status ~~—as well as perceived stress—~~ straddling the economic downturn and link these exposures to individual changes in smoking habits. Additionally, in comparison to national smoking rates (2007: 23.0% of population; 2009: 19.0%) the prevalence rates from 2007 to 2009 of this sample are relatively analogous – offering support for the generalizability of the sample.

Our findings partially corroborate previous research on the pro-cyclical nature of the association between economic downturns and smoking habit, i.e. during recessions, smoking habits may be dampened. Among male former smokers, those who experienced a decline in income during the economic recession had a significantly lower risk of relapse two years later. Conversely, among men whose incomes ~~or stress levels~~ increased during the period of recession, their risk of relapse was considerably higher compared to those whose incomes stayed the same. Although the direction of associations was similar among women, none of the estimates were statistically significant.

Taken together, the main significant finding of our analyses is that male former smokers whose incomes fell during the period of the economic collapse experienced a reduced risk of relapse. Ruhm hypothesized that this risk reduction is possibly driven by a tendency to adopt healthier behaviours during periods of reduced income – driven by an increase in positive health behaviours (i.e. exercise) that accompanies newly acquired increased leisure time during economic contractions.<sup>21</sup> It could also be argued their behaviour change in a recession can be either intentional or inadvertent. When facing enforced economic inactivity – individuals may

1  
2  
3 choose to fill their time by actively investing in positive personal health changes, which include  
4 stopping smoking or joining a fitness club. It is equally plausible that a drop in income  
5 involuntarily forces smokers to give up their habit. However, our results did not indicate an  
6 increased risk of quitting among those whose incomes fell— which is ~~not~~inconsistent with the  
7 latter hypothesis, as well as previous research by Siahpush & Carlin.<sup>22</sup>  
8  
9

10  
11 Foremost, our findings support Ruhm's theory of the positive effects of recessions on a  
12 population's health behaviours.<sup>12</sup> Ruhm revealed an association between markers (e.g.  
13 unemployment) of economic downturns and reductions in smoking, with an increase being seen  
14 during economic expansion. Though tobacco products are likely to be procyclical goods, as  
15 Ruhm further points out, offering some explanation of the decrease we observed, it does not  
16 explain all of the mechanisms involved.  
17  
18

19  
20 We caution that our findings regarding recession, income change, and smoking habits cannot be  
21 generalized to other health outcomes. For example, observational reports found a spike in female  
22 cardiac emergency visits during the week corresponding to the economic collapse in October of  
23 2008.<sup>3</sup> In accordance with this, our previous analysis on changes in mental health revealed  
24 significant increases in stress for mainly women.<sup>4</sup> This increase in stress for women, however  
25 threatening ~~of~~to related health outcomes, did not prove to be associated with an increased  
26 likelihood of relapsing.  
27  
28

29  
30 Our findings are also congruent with multiple models explaining the link between stress levels  
31 and smoking behaviour. Though much research shows stress as a cause of smoking,<sup>16 17</sup>  
32 additional research actually points to cigarette smoking as a cause of stress and, furthermore,  
33 smoking cessation as leading to a reduction in stress.<sup>23</sup> This is in line with our findings, as both  
34 male and female relapsed smokers had the lowest levels of stress before the collapse when they  
35 considered themselves as having quit smoking in 2007 (table 4), yet experienced an increase in  
36 stress post-collapse—significantly for women. This may also point to a vulnerability of this  
37 group to use smoking as a means of alleviating stress—explaining their relapse in smoking after  
38 the collapse.<sup>24</sup> This vulnerability has been discussed and supported by previous research showing  
39 economic stress as a cause of adverse mental health.<sup>25</sup> This increased stress may have also been  
40 amplified by a return to smoking, as Cohen & Lichtenstein have found.<sup>26</sup> Caution is warranted in  
41 interpreting the findings on stress, however, since smokers may be citing an increase in  
42 perceived stress to justify their relapse or failure to quit.  
43  
44  
45  
46  
47  
48

### 49 **Study limitations**

50  
51 Some limitations of our study should be noted. Relapsed smokers and quitters represent a small  
52 proportion of the population, and hence our odds ratios were estimated with imprecision.  
53 Similarly, we lacked statistical power to directly examine the effects of a change in employment  
54 status on change in smoking habits. In other words, though we were able to examine the effects  
55 of income change, we were not able to directly estimate the effects of unemployment as there  
56  
57  
58  
59  
60

1  
2  
3 were too few individuals in the sample who lost their jobs between 2007 and 2009. Finally,  
4 smoking status was based on self-report only, and not validated by biomarkers such as cotinine.  
5 This may have produced misclassification of the outcome, though it is not clear whether this  
6 misclassification was differential by exposure status (e.g. income changes).  
7  
8

## 9 10 **Conclusions**

11 Our large population-based cohort with assessment points straddling the 2008 economic crisis in  
12 Iceland revealed a reduction in smoking rates from the short periods before and after the start of  
13 the crisis - though our study could not disentangle the direct effects of the crisis with other  
14 mechanisms, e.g. secular trends, changing cigarette prices. Chiefly, this examination revealed a  
15 decisive role of income change ~~and perceived stress~~ on the risk of relapsing after the collapse  
16 among former male smokers.  
17  
18  
19

## 20 21 **Notes**

22  
23 **Contributors:** CM and IK (study guarantor) were responsible for the design of the study and preparation  
24 of the manuscript. CM conducted data analyses. AH and UV obtained funding. All contributors  
25 interpreted the data, contributed to the writing of the paper and approved the final version of the  
26 manuscript.  
27

28  
29 **Funding:** The project was funded in part by the Icelandic Centre for Research (RANNÍS). The authors  
30 are responsible for the manuscript's content, not the funding bodies.  
31

32  
33 **Competing interests:** All authors have completed the Unified Competing Interest form at  
34 [www.icmje.org/coi\\_disclosure.pdf](http://www.icmje.org/coi_disclosure.pdf) (available on request from the corresponding author) and declare: no  
35 other authors had financial relationships with any organisations that might have an interest in the  
36 submitted work in the previous 3 years.  
37

38  
39 **Ethical approval:** The study was approved by the Ethics Review Board of Iceland (09-094) and the Data  
40 Protection Authority of Iceland (S4455).  
41

42  
43 **Data sharing:** No additional data available.  
44  
45  
46  
47  
48  
49  
50  
51  
52  
53  
54  
55  
56  
57  
58  
59  
60

## Figures and Tables

Figure 1- The cohort of the “Health and well-being”-study.

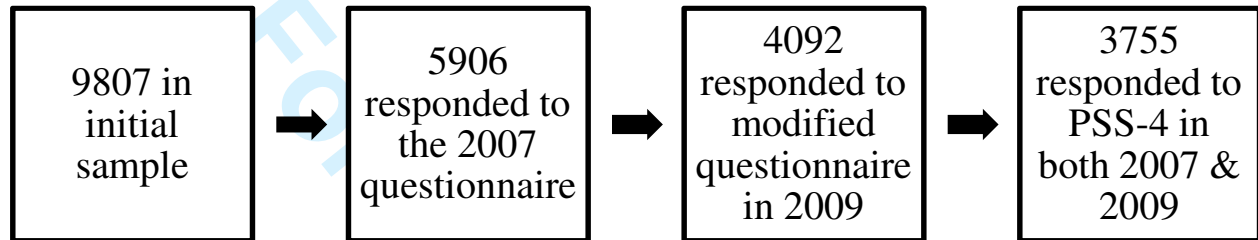

Table 1 – Baseline characteristics (in 2007) of the cohort and among differential smoking status

|                           | Cohort                   | Relapsed in 2009 | Quit Smoking in 2009 |
|---------------------------|--------------------------|------------------|----------------------|
| <b>n</b>                  | 3755                     | 56               | 160                  |
| Age Mean ± SD             | 52.3 ± 16.0              | 45.7 ± 14.2      | 47.4 ± 15.5          |
| <b>Sex</b>                | <b>n (% of category)</b> |                  |                      |
| Male                      | 1763 (47.0)              | 31 (55.4)        | 82 (51.3)            |
| Female                    | 1992 (53.0)              | 25 (44.6)        | 78 (48.8)            |
| <b>Marital status</b>     |                          |                  |                      |
| Single/Divorced           | 556 (14.9)               | 7 (12.513.0)     | 31 (19.49)           |
| Committed, not cohabiting | 131 (3.5)                | 2 (3.67)         | 9 (5.68)             |
| Married, cohabiting       | 2871 (76.7)              | 45 (80.483.3)    | 116 (72.574.4)       |
| <b>Education</b>          |                          |                  |                      |
| Basic                     | 1688 (47.1)              | 22 (40.7)        | 65 (42.5)            |
| Middle                    | 971 (27.1)               | 15 (27.8)        | 51 (33.3)            |
| University                | 928 (25.9)               | 17 (31.5)        | 37 (24.2)            |
| <b>Employment status</b>  |                          |                  |                      |
| Employed                  | 2019 (58.4)              | 37 (71.2)        | 98 (64.5)            |
| Unemployed                | 169 (4.9)                | 3 (5.8)          | 10 (6.6)             |
| Student                   | 122 (3.5)                | 1 (1.9)          | 5 (3.3)              |
| Homemaker/Paternal Leave  | 159 (4.6)                | 2 (3.8)          | 9 (5.9)              |
| Retired                   | 872 (25.2)               | 4 (7.7)          | 24 (15.8)            |
| Disabled                  | 119 (3.4)                | 5 (9.6)          | 6 (3.9)              |
| <b>Household income</b>   |                          |                  |                      |

|        |             |           |           |
|--------|-------------|-----------|-----------|
| Low    | 621 (20.6)  | 8 (17.0)  | 22 (16.5) |
| Middle | 1855 (61.4) | 25 (53.2) | 80 (60.2) |
| High   | 543 (18.0)  | 14 (29.8) | 31 (23.3) |

Table 2 – The ratio of odds ratio of relapsing in 2009 among those who had quit smoking at the baseline (2007)

|                                                                   |                      | OR (95% CI) a        |                    |                    |
|-------------------------------------------------------------------|----------------------|----------------------|--------------------|--------------------|
|                                                                   |                      | Overall              | Male               | Female             |
| <b>2009 Status</b>                                                |                      |                      | Ref                | 0.67 (0.38, 1.18)  |
| <b>Age</b>                                                        | <b>n</b>             | -                    | -                  | -                  |
|                                                                   | 18-39                | 22 Ref               | Ref                | Ref                |
|                                                                   | 40-59                | 26 0.38 (0.21, 0.69) | 0.37 (0.16, 0.85)  | 0.39 (0.16, 0.92)  |
|                                                                   | ≥60                  | 8 0.10 (0.04, 0.23)  | 0.08 (0.03, 0.24)  | 0.14 (0.04, 0.50)  |
| <b>Marital Status</b>                                             |                      |                      |                    |                    |
|                                                                   | Single               | 8 1.11 (0.48, 2.59)  | 0.69 (0.16, 3.11)  | 1.51 (0.53, 4.35)  |
|                                                                   | Married/Cohabiting   | 46 Ref               | Ref                | Ref                |
| <b>Education</b>                                                  |                      |                      |                    |                    |
|                                                                   | Basic                | 22 Ref               | Ref                | Ref                |
|                                                                   | Middle               | 15 0.89 (0.45, 1.77) | 0.82 (0.33, 1.99)  | 1.01 (0.35, 2.96)  |
|                                                                   | University           | 17 1.02 (0.52, 1.99) | 0.99 (0.39, 2.48)  | 1.09 (0.41, 2.90)  |
| <b>Employment status in 2009</b>                                  |                      |                      |                    |                    |
|                                                                   | Employed             | 37 Ref               | Ref                | Ref                |
|                                                                   | Unemployed           | 3 1.37 (0.40, 4.68)  | 1.81 (0.38, 8.65)  | 0.97 (0.12, 7.95)  |
|                                                                   | Disabled             | 4 0.56 (0.16, 1.89)  | 0.17 (0.02, 1.44)  | 2.69 (0.46, 15.64) |
|                                                                   | Retired              | 5 2.49 (0.85, 7.33)  | 0.90 (0.10, 7.97)  | 4.12 (1.11, 15.29) |
| <b>Household income in 2009 b</b>                                 |                      |                      |                    |                    |
|                                                                   | Low                  | 8 0.66 (0.26, 1.70)  | 1.13 (0.24, 5.36)  | 0.56 (0.15, 2.08)  |
|                                                                   | Middle               | 25 1.57 (0.48, 5.17) | 2.28 (0.38, 13.55) | 1.31 (0.21, 8.32)  |
|                                                                   | High                 | 14 Ref               | Ref                | Ref                |
| <b>Household income in 2009 (among high income at baseline) b</b> |                      |                      |                    |                    |
|                                                                   | High income in 2009  | 28 Ref               | Ref                | Ref                |
|                                                                   | Lower income in 2009 | 16 0.53 (0.28, 1.01) | 0.37 (0.16, 0.85)  | 0.92 (0.29, 2.88)  |
| <b>Household income in 2009 (among low income at baseline) b</b>  |                      |                      |                    |                    |
|                                                                   | High income in 2009  | 23 3.14 (1.27, 7.72) | 4.02 (1.15, 14.00) | 2.43 (0.64, 9.19)  |

| Lower income in 2009                                   | 7  | Ref                                             | Ref                                             | Ref                                             |
|--------------------------------------------------------|----|-------------------------------------------------|-------------------------------------------------|-------------------------------------------------|
| <b>Change in stress from 2007 to 2009 <sup>c</sup></b> |    |                                                 |                                                 |                                                 |
| Same                                                   | 7  | <del>Ref</del>                                  | <del>Ref</del>                                  | <del>Ref</del>                                  |
| Decreased                                              | 15 | <del>0.91 (0.35, 2.36) 0.95 (-0.47, 1.90)</del> | <del>0.83 (0.23, 2.99) 1.51 (-0.58, 3.92)</del> | <del>1.03 (0.25, 4.28) 0.67 (-0.24, 1.90)</del> |
| Increased                                              | 34 | <del>1.71 (0.86, 3.37) 2.08 (-1.32, 3.30)</del> | <del>1.75 (0.68, 4.53) 2.82 (-1.17, 6.83)</del> | <del>1.64 (0.61, 4.39) 1.65 (-0.67, 4.08)</del> |

<sup>Δ</sup> Estimates not possible

<sup>a</sup> OR adjusted for statuses in 2009: age, sex

<sup>b</sup> OR adjusted for statuses in 2009: age, sex, baseline income in 2007

<sup>c</sup> OR additionally adjusted for baseline stress (2007)

Or peer review only



Table 3 - The ratio of odds ratio of smoking cessation in 2009 among those who were smokers at the baseline (2007)

|                                                                   |                          | OR (95% CI) <sub>a</sub> |                    |                   |  |
|-------------------------------------------------------------------|--------------------------|--------------------------|--------------------|-------------------|--|
|                                                                   |                          | Overall                  | Male               | Female            |  |
| <b>-2009 Status</b>                                               |                          |                          | Ref                | 0.65 (0.45, 0.93) |  |
| <b>Age</b>                                                        | <b>n</b>                 | -                        | -                  | -                 |  |
|                                                                   | 18-39                    | 24                       | Ref                | Ref               |  |
|                                                                   | 40-59                    | 32                       | 0.60 (0.40, 0.92)  | 0.81 (0.44, 1.51) |  |
|                                                                   | ≥60                      | 34                       | 0.84 (0.52, 1.35)  | 0.46 (0.26, 0.83) |  |
|                                                                   |                          |                          | 0.98 (0.48, 1.97)  | 0.76 (0.40, 1.44) |  |
| <b>Marital status</b>                                             |                          | -                        | -                  | -                 |  |
|                                                                   | Single                   | 34                       | 0.70 (0.45, 1.10)  | 0.73 (0.39, 1.38) |  |
|                                                                   | Married/Cohabiting       | 146                      | Ref                | Ref               |  |
| <b>Education</b>                                                  |                          | -                        | -                  | -                 |  |
|                                                                   | Basic                    | 65                       | Ref                | Ref               |  |
|                                                                   | Middle                   | 54                       | 1.49 (0.97, 2.29)  | 0.81 (0.44, 1.48) |  |
|                                                                   | University               | 37                       | 1.58 (0.97, 2.55)  | 2.78 (1.48, 5.21) |  |
|                                                                   |                          |                          | 0.84 (0.41, 1.73)  | 2.73 (1.38, 5.40) |  |
| <b>Employment status in 2009</b>                                  |                          | -                        | -                  | -                 |  |
|                                                                   | Employed                 | 98                       | Ref                | Ref               |  |
|                                                                   | Unemployed               | 10                       | 0.80 (0.38, 1.68)  | 0.54 (0.19, 1.52) |  |
|                                                                   | Student                  | 5                        | 1.06 (0.51, 2.23)  | Δ                 |  |
|                                                                   | Homemaker/Parental Leave | 9                        | 0.66 (0.37, 1.17)  | 1.49 (0.67, 3.30) |  |
|                                                                   | Disabled                 | 24                       | 0.66 (0.37, 1.17)  | 0.99 (0.41, 2.40) |  |
|                                                                   | Retired                  | 6                        | 1.61 (0.79, 3.26)  | 0.76 (0.28, 2.07) |  |
|                                                                   |                          |                          | 0.90 (0.34, 2.42)  | 0.58 (0.26, 1.28) |  |
|                                                                   |                          |                          | 2.53 (0.48, 13.33) | 3.42 (1.23, 9.52) |  |
|                                                                   |                          |                          | 0.47 (0.12, 1.76)  |                   |  |
| <b>Household income in 2009<sup>***</sup> b</b>                   |                          |                          |                    |                   |  |
|                                                                   | Low                      | 22                       | 0.89 (0.49, 1.60)  | 0.75 (0.33, 1.74) |  |
|                                                                   | Middle                   | 80                       | 0.98 (0.45, 2.13)  | 0.80 (0.27, 2.38) |  |
|                                                                   | High                     | 31                       | Ref                | Ref               |  |
| <b>Household income in 2009 (among high income at baseline) b</b> |                          |                          |                    |                   |  |
|                                                                   | High income in 2009      | 96                       | Ref                | Ref               |  |
|                                                                   | Low income in 2009       | 32                       | 0.75 (0.46, 1.22)  | 0.82 (0.41, 1.62) |  |
| <b>Household income in 2009 (among low income at baseline) b</b>  |                          |                          |                    |                   |  |
|                                                                   | High income in 2009      | 89                       | 0.68 (0.30, 1.55)  | 0.61 (0.19, 1.97) |  |
|                                                                   | Low income in 2009       | 8                        | Ref                | Ref               |  |
| <b>Change in stress from 2007 to 2009 c</b>                       |                          |                          |                    |                   |  |
|                                                                   | Same                     | 22                       | Ref                | Ref               |  |

|           |    |                   |                   |                   |
|-----------|----|-------------------|-------------------|-------------------|
| Decreased | 62 | 0.84 (0.47, 1.48) | 0.73 (0.34, 1.56) | 0.98 (0.41, 2.31) |
| Increased | 76 | 0.98 (0.64, 1.51) | 0.66 (0.36, 1.22) | 1.38 (0.74, 2.58) |

a OR adjusted for statuses in 2009: age, sex

b OR adjusted for statuses in 2009: age, sex, baseline income in 2007

c OR additionally adjusted for baseline stress (2007)

a-OR adjusted for statuses in 2009: age, sex, education, marital status

b-OR adjusted for statuses in 2009: age, sex, education, marital status, adults in household

Table 4 – Average stress levels according to smoking status – among waves (2007 & 2009)

|                     | 2007             | 2009             |               |
|---------------------|------------------|------------------|---------------|
|                     | Stress Mean (SD) | Stress Mean (SD) | p-value (F) ± |
| <b>Never smoker</b> |                  |                  |               |
| Male                | 3.70 (2.75)      | 3.83 (2.69)      | 0.31 (1.02)   |
| Female              | 4.18 (2.70)      | 4.40 (2.90)      | 0.44 (0.60)   |
| <b>Relapsed</b>     |                  |                  |               |
| Male                | 3.52 (2.28)      | 4.94 (2.80)      | 0.28 (1.20)   |
| Female              | 3.96 (2.52)      | 5.24 (3.46)      | 0.01 (7.67)   |
| <b>Quit smoking</b> |                  |                  |               |
| Male                | 4.21 (2.71)      | 4.16 (2.78)      | 0.91 (0.01)   |
| Female              | 4.38 (3.49)      | 5.03 (3.35)      | 0.13 (2.31)   |

\* Prevalence rates compared using chi squared tests

± Repeated measures ANOVA (p-values, F statistic) used to examine overall and gender-specific mean differences in stress levels from 2007 to 2009; adjusted for age in 2009

## References

- 1  
2  
3  
4  
5  
6  
7  
8  
9  
10  
11  
12  
13  
14  
15  
16  
17  
18  
19  
20  
21  
22  
23  
24  
25  
26  
27  
28  
29  
30  
31  
32  
33  
34  
35  
36  
37  
38  
39  
40  
41  
42  
43  
44  
45  
46  
47  
48  
49  
50  
51  
52  
53  
54  
55  
56  
57  
58  
59  
60
- <sup>1</sup> Wade RG, Sigurgeirsdottir S. Iceland's rise, fall, stabilisation and beyond. *Cambridge Journal of Economics* 2012;36:127-144.
  - <sup>2</sup> Vaiman V, Sigurjonsson TO, Davidsson PA. Weak business culture as antecedents of economic crisis: the case of Iceland. *J Business Ethics* 2011;98(2).
  - <sup>3</sup> Gudjonsdottir GR, Kristjansson M, Olafsson O, Arna DO, Getz L, Sigurdsson JA, Gudmundsson S, Valdimarsdottir U. Immediate surge in female visits to the cardiac emergency department following the economic collapse in Iceland: an observational study. *Emerg Med J* 2011. doi:10.1136/emmermed-2011-200518
  - <sup>4</sup> Hauksdóttir A, McClure C, Jónsson SH, Ólafsson Ö, Valdimarsdóttir U. Increased stress levels in women following an economic collapse. *Submitted* 2011.
  - <sup>5</sup> Brenner HM. Relation of economic change to Swedish health and social well-being, 1950–1980. *Social Science & Medicine*. 1987;25(2):183–95.
  - <sup>6</sup> Tapias Granados JA. Increasing mortality during the expansions of the US economy, 1900–1996. *Int J Epidemiol* 2005;34(6):1194–202.
  - <sup>7</sup> Tapias Granados JA. Macroeconomic fluctuations and mortality in postwar Japan. *Demography* 2008;45(2):323–43.
  - <sup>8</sup> Tapias Granados JA, Diez Roux AV. Life and death during the Great Depression. *PNAS* 2009;106(41):17290–5.
  - <sup>9</sup> Stuckler D, Basu S, Suhrcke M, Coutts A, McKee M. The public health effect of economic crises and alternative policy responses in Europe: an empirical analysis. *Lancet* 2009;374: 315-323.
  - <sup>10</sup> Khang Y-H, Lynch JW, Kaplan GA. Impact of economic crisis on cause-specific mortality in South Korea. *Int J Epidemiol* 2005;34(6):1291–1301.
  - <sup>11</sup> Ruhm CJ. Good times make you sick. *Journal of Health Economics* 2003;22:637-658.
  - <sup>12</sup> Ruhm CJ. Are recessions good for your health? *Q J Econ* 2000;115(2):617-650.
  - <sup>13</sup> [Shiahpush M, Carlin JB. Financial stress, smoking cessation and relapse: results from a prospective study of an Australian national sample. \*Addiction\* 2006;101\(1\):121-127.](#)
  - <sup>14</sup> [Shaw B, Agahi N, Krause N. Are changes in financial strain associated with changes in alcohol use and smoking among older adults? \*Journal of Studies on Alcohol and Drugs\* 2011;72\(6\):917-925.](#)
  - <sup>15</sup> [Gallus S, Tramacere I, Pacifici R, Zuccaro P, Colombo P, Ghislandi S, La Vecchia C. Smoking in Italy 2008-2009: a rise in prevalence related to the economic crisis? \*Prev Med\* 2011;52:182-183](#)
  - <sup>16</sup> [Childs E, de Wit H. Effects of acute psychosocial stress on cigarette craving and smoking. \*Nicotine Tob Res\* 2010;12\(4\):449-453.](#)
  - <sup>17</sup> [Tsourtos G, Ward PR, Muller R, Lawn S, Winefield AH, Hersh D, Coverney J. The importance of resilience and stress to maintaining smoking abstinence and cessation: a qualitative study in Australia with people diagnosed with depression. \*Health & Social Care in the Community\* 2011;19\(3\):299-306.](#)
  - <sup>18</sup> Cohen S, Kamarck T, Mermelstein R. A global measure of perceived stress. *J Health Soc Behav* 1983;24(4):385-396.
  - <sup>19</sup> Cohen S, Williamson G. Perceived stress in a probability sample of the United States. In S. Spacapan S & Oskamp S (Eds.), *The social psychology of health: Claremont Symposium on applied social psychology* 1988. Newbury Park, CA: Sage.
  - <sup>20</sup> Statistics Iceland. Lifestyle and health [Internet]. [cited 2012 Mar 22]. Available from: <http://www.statice.is/Statistics/Health,-social-affairs-and-justi/Lifestyle-and-health>
  - <sup>21</sup> Ruhm CJ. Healthy living in hard times. *Journal of Health Economics* 2005;24(2):341–63.
  - <sup>22</sup> [Shiahpush M, Carlin JB. Financial stress, smoking cessation and relapse: results from a prospective study of an Australian national sample. \*Addiction\* 2006;101\(1\):121-127.](#)
  - <sup>23</sup> Parrott A. Does cigarette smoking cause stress? *American Psychologist* 1999;54(10):817-820.
  - <sup>24</sup> Perkins KA, Grobe JE. Increased desire to smoke during acute stress. *British Journal of Addiction* 1992;87(7):1037-1040.
  - <sup>25</sup> Aldwin CM, Revenson T. Vulnerability to economic stress. *Am J Community Psychology* 1986;14(2):161-175.
  - <sup>26</sup> Cohen S, Lichtenstein E. Perceived stress, quitting smoking, and smoking relapse. *Health Psychol* 1990;9:466-478.



**Economic crisis and smoking behaviour: Prospective cohort study in Iceland**

|                                 |                                                                                                                                                                                                                                                                                                                                                                                                                        |
|---------------------------------|------------------------------------------------------------------------------------------------------------------------------------------------------------------------------------------------------------------------------------------------------------------------------------------------------------------------------------------------------------------------------------------------------------------------|
| Journal:                        | <i>BMJ Open</i>                                                                                                                                                                                                                                                                                                                                                                                                        |
| Manuscript ID:                  | bmjopen-2012-001386.R2                                                                                                                                                                                                                                                                                                                                                                                                 |
| Article Type:                   | Research                                                                                                                                                                                                                                                                                                                                                                                                               |
| Date Submitted by the Author:   | 09-Aug-2012                                                                                                                                                                                                                                                                                                                                                                                                            |
| Complete List of Authors:       | McClure, Christopher; Centre of Public Health Sciences, University of Iceland, Department of Medicine<br>Valdimarsdttir, Unnur; Centre of Public Health Sciences, University of Iceland, Department of Medicine<br>Hauksdóttir, Arna; Centre of Public Health Sciences, University of Iceland, Department of Medicine<br>Kawachi, Ichiro; Harvard School of Public Health, Department of Society Human Development and |
| <b>Primary Subject Heading</b>: | Smoking and tobacco                                                                                                                                                                                                                                                                                                                                                                                                    |
| Secondary Subject Heading:      | Public health, Epidemiology, Mental health, Health economics, Addiction                                                                                                                                                                                                                                                                                                                                                |
| Keywords:                       | PUBLIC HEALTH, Adult psychiatry < PSYCHIATRY, EPIDEMIOLOGY, MENTAL HEALTH, Health economics < HEALTH SERVICES ADMINISTRATION & MANAGEMENT                                                                                                                                                                                                                                                                              |
|                                 |                                                                                                                                                                                                                                                                                                                                                                                                                        |

SCHOLARONE™  
Manuscripts

only

# Economic crisis and smoking behaviour: Prospective cohort study in Iceland

Christopher B. McClure, *doctoral student*,<sup>1</sup> Unnur A. Valdimarsdóttir, *associate professor and chair*,<sup>1</sup> Arna Hauksdóttir, *assistant professor*<sup>1</sup>, Ichiro Kawachi, *professor and chair*<sup>2</sup>

1. Centre of Public Health Sciences, University of Iceland, Stapi on Hringbraut, 101 Reykjavik, Iceland
2. Department of Society, Human Development, and Health, Harvard School of Public Health, 677 Huntington Avenue, Kresge Building 7th Floor, Boston, Massachusetts 02115, USA

**Correspondence to:** C McClure [cbm1@hi.is](mailto:cbm1@hi.is)

“The Corresponding Author has the right to grant on behalf of all authors and does grant on behalf of all authors, a worldwide licence to the Publishers and its licensees in perpetuity, in all forms, formats and media (whether known now or created in the future), to i) publish, reproduce, distribute, display and store the Contribution, ii) translate the Contribution into other languages, create adaptations, reprints, include within collections and create summaries, extracts and/or, abstracts of the Contribution, iii) create any other derivative work(s) based on the Contribution, iv) to exploit all subsidiary rights in the Contribution, v) the inclusion of electronic links from the Contribution to third party material where-ever it may be located; and, vi) licence any third party to do any or all of the above.”

## Abstract

**Objective** To determine whether the strains of a national economic collapse affect smoking cessation and risk of smoking relapse in the population.

**Design** A population-based, prospective cohort study based on a mail survey (*Health and Wellbeing in Iceland*) assessed in 2007 and 2009.

**Setting** National mail survey

**Participants** Representative cohort (n=3755) of Icelandic adults.

**Main outcome measure** Smoking status.

**Results** A significant reduction in the prevalence of smoking was observed from 2007 (pre-economic collapse) to 2009 (post-collapse) in both males (17.4% to 14.8%; P 0.01) and females (20.0% to 17.5%; P 0.01) in the cohort (n= 3755). An increase in income from pre- to post-collapse among males (odds ratio 4.02; 95% confidence interval 1.15, 14.00) was strongly associated with an increased risk of relapse. Conversely, male former smokers experiencing a reduction in income were less likely to relapse (OR 0.37; 95% CI 0.16, 0.85). Regarding the propensity of pre-collapse smokers to quit in the period after the collapse, female smokers were less likely to quit compared to males (OR 0.65; 95% CI 0.45, 0.93).

**Conclusions** In line with on-going secular trend, the overall prevalence of smoking continued to decrease following the 2008 economic crisis in Iceland. Income increase during the period 2007-2009 was strongly associated with having relapsed in 2009, particularly among men, offering support for a pro-cyclical association between smoking and income. Yet the findings must be taken with caution, as they are based on a low number of subjects.

### Article Summary

#### Article Focus

- ◆ An examination on the association between economic crises and smoking behaviours, i.e. is a change in income related to a change in smoking status?

#### Key Messages

- ◆ Evidence for the association between increased income and increased risk of smoking relapse following an economic collapse.
- ◆ Evidence for an association between decreased income and decreased risk of relapse.
- ◆ Gender differences in smoking—represented by higher female prevalence rates and decreased likelihood of quitting for females compared to males.

#### Strengths and limitations of this study

- ◆ A representative prospective cohort study assessed at two time points, which straddle the start of a severe economic crisis.
- ◆ Due to the low number of individuals that change their smoking behaviours in a short period, we were unable to assess the effects of a change in employment on smoking

1  
2  
3  
4  
5  
6  
7  
8  
9  
10  
11  
12  
13  
14  
15  
16  
17  
18  
19  
20  
21  
22  
23  
24  
25  
26  
27  
28  
29  
30  
31  
32  
33  
34  
35  
36  
37  
38  
39  
40  
41  
42  
43  
44  
45  
46  
47  
48  
49  
50  
51  
52  
53  
54  
55  
56  
57  
58  
59  
60

habits.  
◆ Findings are based on a low number of subjects and must be taken with caution.

For peer review only

## Introduction

The Icelandic economy was severely affected by the global economic collapse of 2008. After a decade-long period of financial prosperity the nation was plunged into a recession of such severity that similar contractions had only been seen a handful of times before.<sup>1 2</sup>

Previous research on the health consequences of the Icelandic economic collapse has suggested adverse impacts on cardiovascular and mental health among women.<sup>3 4</sup> In the broader literature on economic crises and population health, however, it has been debated whether health moves in a pro-cyclical or counter-cyclical direction to macro-economic conditions. The work of Brenner beginning in the 1970s suggested that mortality is counter-cyclical, i.e. when the economy is down, mortality rates – in particular, suicides – rise.<sup>5</sup> However, in more recent years, a series of econometric studies have suggested that mortality is pro-cyclical, i.e. during economic contractions death rates decline.<sup>6 7 8 9</sup> There are plausible reasons for this unexpected finding – for instance, during the 1998 Korean financial crisis, economic activity was so depressed that there was a detectable decline in traffic-related mortality.<sup>10</sup> Others have speculated – without direct evidence – that people are more likely to be over-worked and “stressed” during economic booms than during busts, having less time flexibility to engage in health promoting behaviours.<sup>11 12</sup>

Few studies, however, have used individual-level data to test the association between recession and health, especially smoking. Most of the evidence to date has been at the ecological level, though not all.<sup>13</sup> For instance, Shaw et al. found a direct association between economic hardship and a propensity to smoke.<sup>14</sup> Using U.S. data, Ruhm previously reported that economic recession was associated with a decline in the prevalence of cigarette smoking.<sup>12+2</sup> A recent report from Gallus et al. found that the recent economic contraction in Italy has given rise to an increase in the percentage of current smokers – primarily for females.<sup>15</sup> In the present study, we took advantage of the natural experiment afforded by the Icelandic crisis to examine the relationship between changes in economic conditions and smoking behaviour. Utilizing a prospective cohort of Icelandic adults assessed before (in 2007) and after the start of the collapse (in 2009), we sought to examine the risk of relapse among pre-collapse former smokers, as well as quitting behaviour among current smokers in terms of economic changes. Furthermore, because of the important role of perceived stress on smoking status, we sought to examine the potential influence of stress on the studied associations.<sup>16 17</sup>

## Methods

### Design and Samples

### Cohort



1  
2  
3 Our cohort is based on the *Health and Wellbeing in Iceland* health survey. Data was collected by  
4 a questionnaire in two waves: (1) from October to December of 2007 (10-12 months pre-  
5 collapse), then again (2) between November and December of 2009 (13-14 months post-  
6 collapse). The cohort was based on a stratified random sample of the Icelandic population  
7 (n=9807), which was selected from 12 strata: consisting of two geographic regions further  
8 stratified by six age groups. Of the initial 9807, a total of 5918 responded to the initial 2007  
9 assessment (response rate of 60.3%), with 4092 responding again to the modified version of the  
10 survey in 2009 (response rate of 82.8% of those who responded to the pre-collapse baseline  
11 survey). Because of the importance of stress as a potential predictor of smoking behaviour, we  
12 excluded individuals who did not have complete responses to the *Perceived Stress Scale* in both  
13 2007 and 2009. This left a final analytical sample of n=3755. Figure 1 shows the cohort attrition  
14 over questionnaire waves.  
15  
16  
17  
18  
19

## 20 Measures

### 21 *Smoking status and behaviour*

22  
23  
24  
25 In the questionnaire, we inquired about smoking status, i.e. whether respondents were current  
26 smokers, had quit smoking, or had never smoked. In order to examine the likelihood of relapsing  
27 or quitting following an economic collapse, respondents were stratified according to their  
28 smoking status: non-smoker, relapsed, and quit smoking.  
29  
30

31 Non-smoker: An individual was classified as a non-smoker if they responded that they did not  
32 currently smoke on both the 2007 and 2009 assessments.  
33  
34

35 Relapsed smoker: An individual was identified as relapsed if they indicated that they (a) were a  
36 former smoker on the 2007 questionnaire, but indicated they had (b) smoked in any frequency in  
37 2009. In our analyses estimating the odds ratios of relapse, the base population was restricted to  
38 individuals who were former smokers at baseline.  
39  
40

41 Quit smoking: A respondent that had quit smoking must have indicated that they were (a)  
42 currently smoking in 2007, yet had (b) quit smoking by 2009. In our analyses estimating the odds  
43 ratios of quitting, our base population was restricted to individuals who were current smokers at  
44 baseline.  
45  
46

### 47 *Change in economic status*

48  
49 Additional socio-economic questions pertained to employment and income status. Household  
50 income was classified into income ranges of (in terms of Icelandic currency; ISK) (1) low ( $\leq$  3.4  
51 million ISK), (2) middle (3.5-9.4 million ISK), and (3) high ( $\geq$  9.5 million ISK); corresponding  
52 approximately to (1)  $\leq$  28,000 USD, (2) 28,000-77,000 USD, and (3)  $\geq$  77,000 USD. For  
53 analysis of income change, household income was further dichotomized into either high or “low”  
54 (which combined the middle & low income categories). We examined two types of income  
55  
56  
57  
58  
59  
60

change: a) drop in income between 2007 and 2009 from high to low; and b) a rise in income between 2007 and 2009 from low to high.

### *Change in perceived stress*

Psychological stress was measured in both 2007 and 2009 using the four-item Perceived Stress Scale (PSS-4).<sup>18</sup> The PSS-4 is a shortened, validated, and acceptable substitute for the original scale,<sup>19</sup> with scores ranging from 0-16; the higher the score, the higher the perceived stress. An increase in stress was classified as any increase from baseline to follow-up; conversely, a decrease was classified as any decrease from baseline to follow-up. For example, an individual with a score of 5 in 2007 and a score of 10 in 2009 would be classified as having an increase in stress.

### *Explanatory variables and demographics*

Our regression models controlled for the following socio-demographic covariates: age, sex, marital status, and education. Education was categorized as (1) basic (completed primary school or less), (2) middle (completed high school or equivalent), and (3) university (a completed university degree). Employment status was categorized as (1) employed, (2) unemployed, (3) student (4) homemaker/paternal leave, (5) retired, and (6) disabled.

### **Statistical analyses**

Table 1 presents the distribution of socio-demographic characteristics according to change in smoking status between 2007 and 2009.

Binary logistic regression was used to estimate odds ratio (corresponding 95% confidence intervals) of relapse in 2009 (table 2), and the odds of quitting smoking in 2009 (table 3) by background characteristics, change in income and stress levels. Analyses were also stratified by gender. Models were adjusted for age and sex; models for household income and income change were additionally adjusted for baseline income levels. As previous research supports the role of stress as a mediator of an individual's propensity to change smoking status,<sup>16+5 17+6 232+</sup> we also ran models of relapse and cessation with and without the inclusion of (1) changes in stress levels between 2007 and 2009 and (2) baseline stress levels.

Repeated measures ANOVA (p-values, F statistic) was used to examine overall and gender-specific mean differences in stress levels from 2007 to 2009 (table 4). Statistical analyses were conducted with IBM SPSS Statistics version 19.0 (SPSS Inc, Chicago, Illinois). Statistical significance was set at the 0.05 level, and all tests were 2-tailed.

## **Results**

### **Baseline characteristics**

1  
2  
3 Table 1 describes the baseline characteristics of the cohort in 2007 (n=3755), which was 53.0%  
4 female, 76.7% married/cohabiting, and with a mean (SD) age of 52.3 (16.0). Table 1 also  
5 describes the characteristics of those that had relapsed and quit: 72.2% (n=2711) of the cohort  
6 were non-smokers, 4.0% (n=56) of the former smokers at baseline had relapsed in 2009, and  
7 22.2% (n=149) of smokers at baseline had quit smoking in 2009. A significant reduction (P <  
8 0.01) in the prevalence of smokers was observed from 2007 to 2009 in both males (17.4% to  
9 14.8%) and females (20.0% to 17.5%).  
10  
11  
12

### 13 **Relapse smoking**

14  
15  
16 Among individuals who were former smokers at baseline (table 2), decreased odds of relapsing  
17 in 2009 (after the collapse) were observed in the older age groups (compared to those aged 18-  
18 39), regardless of gender (age of 40-59: odds ratio 0.38; 95% confidence interval 0.21, 0.69 | age  
19 ≥ 60: 0.10; 0.04, 0.23).  
20  
21

22 While an individual's employment status was not involved in their risk of relapsing, retired  
23 females showed a significant increased risk of relapsing (4.12; 1.11, 15.29), compared to the  
24 employed.  
25  
26

27 Among men in the lower income groups at baseline (i.e. low, middle), those who moved into the  
28 high income group in 2009 experienced an increased risk of relapse (4.02; 1.15, 14.00)—while  
29 among those in the high income group at baseline, those whose incomes dropped had a decreased  
30 risk of relapsing (0.37; 0.16, 0.85). Further adjustments for a change in stress levels from 2007 to  
31 2009, showed limited attenuation in the coefficients, suggesting some mediation by perceived  
32 stress – i.e. former smokers whose incomes increased between 2007 and 2009 may have relapsed  
33 in part because of an increase in stress.  
34  
35  
36

### 37 **Smoking cessation**

38  
39  
40 Females were less likely to quit smoking in 2009 (0.65; 0.45, 0.93), compared to males. An  
41 increased likelihood of quitting in 2009 was observed among the following female groups: those  
42 with middle (2.78; 1.48, 5.21) or university-level (2.73; 1.38, 5.40) education compared to a  
43 basic, and the disabled (3.42; 1.23, 9.52) compared to the employed. Compared to females aged  
44 18-29, those in the middle-aged group (0.46; 0.26, 0.83) were less likely to quit. Additional  
45 adjustments for a change in stress levels from baseline to follow-up in the cessation models  
46 revealed no diminished significance in effect sizes.  
47  
48  
49

### 50 **Stress and smoking**

51  
52 Though stress change (increase vs. stable, decrease vs. stable) did not predict a relapse in females  
53 in aforementioned analyses, further examination of changes in stress levels among smoking  
54 status displayed a significant change in mean stress levels (SD) among females that had relapsed,  
55  
56  
57  
58  
59  
60

1  
2  
3 with a significant increase in stress scores from 3.96 (2.52) in 2007 to 5.24 (3.46) (P 0.01; F =  
4 7.67).  
5  
6  
7

## 8 9 **Discussion**

10  
11 In response to the severe economic collapse in Iceland, we found that the prevalence of smoking  
12 continued to decrease for both genders in the short period after. This drop in smoking may be  
13 attributed to background secular trends,<sup>20</sup> while other factors, such as changes in the price of  
14 cigarettes, change of priorities in the favour of more health promoting behaviours or anti-  
15 smoking campaigns, may also play a role. The strength of our study is that we were able to  
16 document changes in individual economic status straddling the economic downturn and link  
17 these exposures to individual changes in smoking habits. Additionally, in comparison to national  
18 smoking rates (2007: 23.0% of population; 2009: 19.0%) the prevalence rates from 2007 to 2009  
19 of this sample are relatively analogous – offering support for the generalizability of the sample.  
20  
21  
22  
23

24  
25 Our findings partially corroborate previous research on the pro-cyclical nature of the association  
26 between economic downturns and smoking habit, i.e. during recessions, smoking habits may be  
27 dampened. Among male former smokers, those who experienced a decline in income during the  
28 economic recession had a significantly lower risk of relapse two years later. Conversely, among  
29 men whose incomes increased during the period of recession, their risk of relapse was  
30 considerably higher compared to those whose incomes stayed the same. Although the direction  
31 of associations was similar among women, none of the estimates were statistically significant.  
32  
33  
34

35  
36 Taken together, the main significant finding of our analyses is that male former smokers whose  
37 incomes fell during the period of the economic collapse experienced a reduced risk of relapse.  
38 Ruhm hypothesized that this risk reduction is possibly driven by a tendency to adopt healthier  
39 behaviours during periods of reduced income – driven by an increase in positive health  
40 behaviours (i.e. exercise) that accompanies newly acquired increased leisure time during  
41 economic contractions.<sup>21</sup> It could also be argued their behaviour change in a recession can be  
42 either intentional or inadvertent. When facing enforced economic inactivity – individuals may  
43 choose to fill their time by actively investing in positive personal health changes, which include  
44 stopping smoking or joining a fitness club. It is equally plausible that a drop in income  
45 involuntarily forces smokers to give up their habit. However, our results did not indicate an  
46 increased risk of quitting among those whose incomes fell – which is inconsistent with the latter  
47 hypothesis, as well as previous research by Siahpush & Carlin.<sup>22</sup>  
48  
49  
50  
51

52  
53 Foremost, our findings support Ruhm's theory of the positive effects of recessions on a  
54 population's health behaviours.<sup>12+2</sup> Ruhm revealed an association between markers (e.g.  
55 unemployment) of economic downturns and reductions in smoking, with an increase being seen  
56 during economic expansion. Though tobacco products are likely to be procyclical goods, as  
57  
58  
59  
60

Formate

1  
2  
3 Ruhm further points out, offering some explanation of the decrease we observed, it does not  
4 explain all of the mechanisms involved.  
5  
6

7 We caution that our findings regarding recession, income change, and smoking habits cannot be  
8 generalized to other health outcomes. For example, observational reports found a spike in female  
9 cardiac emergency visits during the week corresponding to the economic collapse in October of  
10 2008.<sup>3</sup> In accordance with this, our previous analysis on changes in mental health revealed  
11 significant increases in stress for mainly women.<sup>4</sup> This increase in stress for women, however  
12 threatening to related health outcomes, did not prove to be associated with an increased  
13 likelihood of relapsing.  
14  
15

16  
17 Our findings are also congruent with multiple models explaining the link between stress levels  
18 and smoking behaviour. Though much research shows stress as a cause of smoking,<sup>16+5 17+6</sup>  
19 additional research actually points to cigarette smoking as a cause of stress and, furthermore,  
20 smoking cessation as leading to a reduction in stress.<sup>23</sup> This is in line with our findings, as both  
21 male and female relapsed smokers had the lowest levels of stress before the collapse when they  
22 considered themselves as having quit smoking in 2007 (table 4), yet experienced an increase in  
23 stress post-collapse—significantly for women. This may also point to a vulnerability of this  
24 group to use smoking as a means of alleviating stress—explaining their relapse in smoking after  
25 the collapse.<sup>24</sup> This vulnerability has been discussed and supported by previous research showing  
26 economic stress as a cause of adverse mental health.<sup>25</sup> This increased stress may have also been  
27 amplified by a return to smoking, as Cohen & Lichtenstein have found.<sup>26</sup> Caution is warranted in  
28 interpreting the findings on stress, however, since smokers may be citing an increase in  
29 perceived stress to justify their relapse or failure to quit. We cannot conclusively argue that stress  
30 did not play a mediating role in the association between income change and smoking behaviour  
31 because of measurement error.  
32  
33  
34  
35  
36  
37

### 38 **Study limitations**

39  
40 Some limitations of our study should be noted. Relapsed smokers and quitters represent a small  
41 proportion of the population, and hence our odds ratios were estimated with imprecision and  
42 must be interpreted with caution. Similarly, we lacked statistical power to directly examine the  
43 effects of a change in employment status on change in smoking habits. In other words, though  
44 we were able to examine the effects of income change, we were not able to directly estimate the  
45 effects of unemployment as there were too few individuals in the sample who lost their jobs  
46 between 2007 and 2009. While our findings are based on the potential effects of an economic  
47 crisis on a change in smoking status, it is not clear whether these similar findings would hold true  
48 in normal scenarios and, thus, caution is warranted when generalizing our findings to other  
49 normative scenarios. Finally, smoking status was based on self-report only, and not validated by  
50 biomarkers such as cotinine. This may have produced misclassification of the outcome, though it  
51 is not clear whether this misclassification was differential by exposure status (e.g. income  
52 changes).  
53  
54  
55  
56  
57  
58  
59  
60

## Conclusions

Our large population-based cohort with assessment points straddling the 2008 economic crisis in Iceland revealed a reduction in smoking rates from the short periods before and after the start of the crisis - though our study could not disentangle the direct effects of the crisis with other mechanisms, e.g. secular trends, changing cigarette prices. Chiefly, this examination revealed a decisive role of income change on the risk of relapsing after the collapse among former male smokers.

## Notes

**Contributors:** CM and IK (study guarantor) were responsible for the design of the study and preparation of the manuscript. CM conducted data analyses. AH and UV obtained funding. All contributors interpreted the data, contributed to the writing of the paper and approved the final version of the manuscript.

**Funding:** The project was funded in part by the Icelandic Centre for Research (RANNÍS). The authors are responsible for the manuscript's content, not the funding bodies.

**Competing interests:** All authors have completed the Unified Competing Interest form at [www.icmje.org/coi\\_disclosure.pdf](http://www.icmje.org/coi_disclosure.pdf) (available on request from the corresponding author) and declare: no other authors had financial relationships with any organisations that might have an interest in the submitted work in the previous 3 years.

**Ethical approval:** The study was approved by the Ethics Review Board of Iceland (09-094) and the Data Protection Authority of Iceland (S4455).

**Data sharing:** No additional data available.

## Figures and Tables

Figure 1- The cohort of the “Health and well-being”-study.

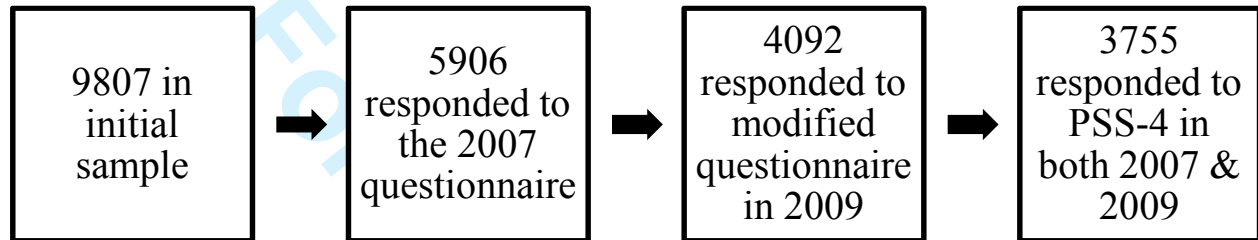

Table 1 – Baseline characteristics (in 2007) of the cohort and among differential smoking status

|                           | Cohort                   | Relapsed in 2009 | Quit Smoking in 2009 |
|---------------------------|--------------------------|------------------|----------------------|
| <b>n</b>                  | 3755                     | 56               | 160                  |
| Age Mean ± SD             | 52.3 ± 16.0              | 45.7 ± 14.2      | 47.4 ± 15.5          |
| <b>Sex</b>                | <b>n (% of category)</b> |                  |                      |
| Male                      | 1763 (47.0)              | 31 (55.4)        | 82 (51.3)            |
| Female                    | 1992 (53.0)              | 25 (44.6)        | 78 (48.8)            |
| <b>Marital status</b>     |                          |                  |                      |
| Single/Divorced           | 556 (14.9)               | 7 (13.0)         | 31 (19.9)            |
| Committed, not cohabiting | 131 (3.5)                | 2 (3.7)          | 9 (5.8)              |
| Married, cohabiting       | 2871 (76.7)              | 45 (83.3)        | 116 (74.4)           |
| <b>Education</b>          |                          |                  |                      |
| Basic                     | 1688 (47.1)              | 22 (40.7)        | 65 (42.5)            |
| Middle                    | 971 (27.1)               | 15 (27.8)        | 51 (33.3)            |
| University                | 928 (25.9)               | 17 (31.5)        | 37 (24.2)            |
| <b>Employment status</b>  |                          |                  |                      |
| Employed                  | 2019 (58.4)              | 37 (71.2)        | 98 (64.5)            |
| Unemployed                | 169 (4.9)                | 3 (5.8)          | 10 (6.6)             |
| Student                   | 122 (3.5)                | 1 (1.9)          | 5 (3.3)              |
| Homemaker/Paternal Leave  | 159 (4.6)                | 2 (3.8)          | 9 (5.9)              |
| Retired                   | 872 (25.2)               | 4 (7.7)          | 24 (15.8)            |
| Disabled                  | 119 (3.4)                | 5 (9.6)          | 6 (3.9)              |
| <b>Household income</b>   |                          |                  |                      |

|        |             |           |           |
|--------|-------------|-----------|-----------|
| Low    | 621 (20.6)  | 8 (17.0)  | 22 (16.5) |
| Middle | 1855 (61.4) | 25 (53.2) | 80 (60.2) |
| High   | 543 (18.0)  | 14 (29.8) | 31 (23.3) |

Table 2 – The odds ratio of relapsing in 2009 among those who had quit smoking at the baseline (2007)

|                                                                   |                      | OR (95% CI) a |                   |                    |
|-------------------------------------------------------------------|----------------------|---------------|-------------------|--------------------|
| 2009 Status                                                       |                      | Overall       | Male              | Female             |
|                                                                   |                      |               | Ref               | 0.67 (0.38, 1.18)  |
| <b>Household income in 2009 b</b>                                 |                      | <b>n *</b>    |                   |                    |
|                                                                   | Low                  | 8             | 0.66 (0.26, 1.70) | 1.13 (0.24, 5.36)  |
|                                                                   | Middle               | 25            | 1.57 (0.48, 5.17) | 2.28 (0.38, 13.55) |
|                                                                   | High                 | 17            | Ref               | Ref                |
| <b>Household income in 2009 (among high income at baseline) b</b> |                      |               |                   |                    |
|                                                                   | High income in 2009  | 5             | Ref               | Ref                |
|                                                                   | Lower income in 2009 | 9             | 0.53 (0.28, 1.01) | 0.37 (0.16, 0.85)  |
| <b>Household income in 2009 (among low incomes at baseline) b</b> |                      |               |                   |                    |
|                                                                   | High income in 2009  | 23            | 3.14 (1.27, 7.72) | 4.02 (1.15, 14.00) |
|                                                                   | Lower income in 2009 | 7             | Ref               | Ref                |
| <b>Change in stress from 2007 to 2009 c</b>                       |                      |               |                   |                    |
|                                                                   | Same                 | 7             | Ref               | Ref                |
|                                                                   | Decreased            | 15            | 0.91 (0.35, 2.36) | 0.83 (0.23, 2.99)  |
|                                                                   | Increased            | 34            | 1.71 (0.86, 3.37) | 1.75 (0.68, 4.53)  |

\* Totals do not include missing values from 2009

a OR adjusted for statuses in 2009: age, sex

b OR adjusted for statuses in 2009: age, sex, baseline income in 2007

c OR additionally adjusted for baseline stress (2007)



Table 3 - The odds ratio of smoking cessation in 2009 among those who were smokers at the baseline (2007)

|                                                                   |                      | OR (95% CI) a        |                   |                   |
|-------------------------------------------------------------------|----------------------|----------------------|-------------------|-------------------|
| 2009 Status                                                       |                      | Overall              | Male              | Female            |
|                                                                   |                      |                      | Ref               | 0.65 (0.45, 0.93) |
| <b>Household income in 2009 b</b>                                 | <b>n *</b>           |                      |                   |                   |
|                                                                   | Low                  | 22 0.89 (0.49, 1.60) | 0.75 (0.33, 1.74) | 1.01 (0.43, 2.36) |
|                                                                   | Middle               | 80 0.98 (0.45, 2.13) | 0.80 (0.27, 2.38) | 1.12 (0.36, 3.46) |
|                                                                   | High                 | 31 Ref               | Ref               | Ref               |
| <b>Household income in 2009 (among high income at baseline) b</b> |                      |                      |                   |                   |
|                                                                   | High income in 2009  | 19 Ref               | Ref               | Ref               |
|                                                                   | Lower income in 2009 | 6 0.75 (0.46, 1.22)  | 0.82 (0.41, 1.62) | 0.68 (0.34, 1.37) |
| <b>Household income in 2009 (among low incomes at baseline) b</b> |                      |                      |                   |                   |
|                                                                   | High income in 2009  | 85 0.68 (0.30, 1.55) | 0.61 (0.19, 1.97) | 0.77 (0.24, 2.41) |
|                                                                   | Lower income in 2009 | 8 Ref                | Ref               | Ref               |
| <b>Change in stress from 2007 to 2009 c</b>                       |                      |                      |                   |                   |
|                                                                   | Same                 | 22 Ref               | Ref               | Ref               |
|                                                                   | Decreased            | 62 0.84 (0.47, 1.48) | 0.73 (0.34, 1.56) | 0.98 (0.41, 2.31) |
|                                                                   | Increased            | 76 0.98 (0.64, 1.51) | 0.66 (0.36, 1.22) | 1.38 (0.74, 2.58) |

\* Totals do not include missing values from 2009

a OR adjusted for statuses in 2009: age, sex

b OR adjusted for statuses in 2009: age, sex, baseline income in 2007

c OR additionally adjusted for baseline stress (2007)

Table 4 – Average stress levels according to smoking status – among waves (2007 &amp; 2009)

|                     | 2007             | 2009             |               |
|---------------------|------------------|------------------|---------------|
|                     | Stress Mean (SD) | Stress Mean (SD) | p-value (F) ± |
| <b>Never smoker</b> |                  |                  |               |
| Male                | 3.70 (2.75)      | 3.83 (2.69)      | 0.31 (1.02)   |
| Female              | 4.18 (2.70)      | 4.40 (2.90)      | 0.44 (0.60)   |
| <b>Relapsed</b>     |                  |                  |               |
| Male                | 3.52 (2.28)      | 4.94 (2.80)      | 0.28 (1.20)   |
| Female              | 3.96 (2.52)      | 5.24 (3.46)      | 0.01 (7.67)   |
| <b>Quit smoking</b> |                  |                  |               |

|        |             |             |             |
|--------|-------------|-------------|-------------|
| Male   | 4.21 (2.71) | 4.16 (2.78) | 0.91 (0.01) |
| Female | 4.38 (3.49) | 5.03 (3.35) | 0.13 (2.31) |

± Repeated measures ANOVA (p-values, F statistic) used to examine overall and gender-specific mean differences in stress levels from 2007 to 2009; adjusted for age in 2009

For peer review only

## References

- 1 Wade RG, Sigurgeirsdottir S. Iceland's rise, fall, stabilisation and beyond. *Cambridge Journal of Economics* 2012;36:127-144.
- 2 Vaiman V, Sigurjonsson TO, Davidsson PA. Weak business culture as antecedents of economic crisis: the case of Iceland. *J Business Ethics* 2011;98(2).
- 3 Gudjonsdottir GR, Kristjansson M, Olafsson O, Arna DO, Getz L, Sigurdsson JA, Gudmundsson S, Valdimarsdottir U. Immediate surge in female visits to the cardiac emergency department following the economic collapse in Iceland: an observational study. *Emerg Med J* 2011. doi:10.1136/emmermed-2011-200518
- 4 Hauksdóttir A, McClure C, Jónsson SH, Ólafsson Ö, Valdimarsdóttir U. Increased stress levels in women following an economic collapse. *Submitted* 2011.
- 5 Brenner HM. Relation of economic change to Swedish health and social well-being, 1950–1980. *Social Science & Medicine*. 1987;25(2):183–95.
- 6 Tapias Granados JA. Increasing mortality during the expansions of the US economy, 1900–1996. *Int J Epidemiol* 2005;34(6):1194–202.
- 7 Tapias Granados JA. Macroeconomic fluctuations and mortality in postwar Japan. *Demography* 2008;45(2):323–43.
- 8 Tapias Granados JA, Diez Roux AV. Life and death during the Great Depression. *PNAS* 2009;106(41):17290–5.
- 9 Stuckler D, Basu S, Suhrcke M, Coutts A, McKee M. The public health effect of economic crises and alternative policy responses in Europe: an empirical analysis. *Lancet* 2009;374: 315-323.
- 10 Khang Y-H, Lynch JW, Kaplan GA. Impact of economic crisis on cause-specific mortality in South Korea. *Int J Epidemiol* 2005;34(6):1291–1301.
- 11 Ruhm CJ. Good times make you sick. *Journal of Health Economics* 2003;22:637-658.
- 12 Ruhm CJ. Are recessions good for your health? *Q J Econ* 2000;115(2):617-650.
- 13 Shiahpush M, Carlin JB. Financial stress, smoking cessation and relapse: results from a prospective study of an Australian national sample. *Addiction* 2006;101(1):121-127.
- 14 Shaw B, Agahi N, Krause N. Are changes in financial strain associated with changes in alcohol use and smoking among older adults? *Journal of Studies on Alcohol and Drugs* 2011;72(6):917-925.
- 15 Gallus S, Tramacere I, Pacifici R, Zuccaro P, Colombo P, Ghislandi S, La Vecchia C. Smoking in Italy 2008-2009: a rise in prevalence related to the economic crisis? *Prev Med* 2011;52:182-183
- 16 Childs E, de Wit H. Effects of acute psychosocial stress on cigarette craving and smoking. *Nicotine Tob Res* 2010;12(4):449-453.
- 17 Tsourtos G, Ward PR, Muller R, Lawn S, Winefield AH, Hersh D, Coverney J. The importance of resilience and stress to maintaining smoking abstinence and cessation: a qualitative study in Australia with people diagnosed with depression. *Health & Social Care in the Community* 2011;19(3):299-306.
- 18 Cohen S, Kamarck T, Mermelstein R. A global measure of perceived stress. *J Health Soc Behav* 1983;24(4):385-396.
- 19 Cohen S, Williamson G. Perceived stress in a probability sample of the United States. In S. Spacapam S & Oskamp S (Eds.), *The social psychology of health: Claremont Symposium on applied social psychology* 1988. Newbury Park, CA: Sage.
- 20 Statistics Iceland. Lifestyle and health [Internet]. [cited 2012 Mar 22]. Available from: <http://www.statice.is/Statistics/Health,-social-affairs-and-justi/Lifestyle-and-health>
- 21 Ruhm CJ. Healthy living in hard times. *Journal of Health Economics* 2005;24(2):341–63.
- 22 Shiahpush M, Carlin JB. Financial stress, smoking cessation and relapse: results from a prospective study of an Australian national sample. *Addiction* 2006;101(1):121-127.
- 23 Parrott A. Does cigarette smoking cause stress? *American Psychologist* 1999;54(10):817-820.
- 24 Perkins KA, Grobe JE. Increased desire to smoke during acute stress. *British Journal of Addiction* 1992;87(7):1037-1040.
- 25 Aldwin CM, Revenson T. Vulnerability to economic stress. *Am J Community Psychology* 1986;14(2):161-175.
- 26 Cohen S, Lichtenstein E. Perceived stress, quitting smoking, and smoking relapse. *Health Psychol* 1990;9:466-478.

## Economic crisis and smoking behaviour: Prospective cohort study in Iceland

Christopher B. McClure, *doctoral student*,<sup>1</sup> Unnur A. Valdimarsdóttir, *associate professor and chair*,<sup>1</sup> Arna Hauksdóttir, *assistant professor*<sup>1</sup>, Ichiro Kawachi, *associate professor and chair*<sup>2</sup>

1. Centre of Public Health Sciences, University of Iceland, Stapi on Hringbraut, 101 Reykjavik, Iceland
2. Department of Society, Human Development, and Health, Harvard School of Public Health, 677 Huntington Avenue, Kresge Building 7th Floor, Boston, Massachusetts 02115, USA

**Correspondence to:** C McClure [cbm1@hi.is](mailto:cbm1@hi.is)

“The Corresponding Author has the right to grant on behalf of all authors and does grant on behalf of all authors, a worldwide licence to the Publishers and its licensees in perpetuity, in all forms, formats and media (whether known now or created in the future), to i) publish, reproduce, distribute, display and store the Contribution, ii) translate the Contribution into other languages, create adaptations, reprints, include within collections and create summaries, extracts and/or, abstracts of the Contribution, iii) create any other derivative work(s) based on the Contribution, iv) to exploit all subsidiary rights in the Contribution, v) the inclusion of electronic links from the Contribution to third party material where-ever it may be located; and, vi) licence any third party to do any or all of the above.”

## Abstract

**Objective** To determine whether the strains of a national economic collapse affect smoking cessation and risk of smoking relapse in the population.

**Design** A population-based, prospective cohort study based on a mail survey (*Health and Wellbeing in Iceland*) assessed in 2007 and 2009.

**Setting** National mail survey

**Participants** Representative cohort (n=3755) of Icelandic adults.

**Main outcome measure** Smoking status.

**Results** A significant reduction in the prevalence of smoking was observed from 2007 (pre-economic collapse) to 2009 (post-collapse) in both males (17.4% to 14.8%; P 0.01) and females (20.0% to 17.5%; P 0.01) in the cohort (n= 3755). An increase in income from pre- to post-collapse among males (odds ratio 4.02; 95% confidence interval 1.15, 14.00) was strongly associated with an increased risk of relapse. Conversely, male former smokers experiencing a reduction in income were less likely to relapse (OR 0.37; 95% CI 0.16, 0.85). Regarding the propensity of pre-collapse smokers to quit in the period after the collapse, female smokers were less likely to quit compared to males (OR 0.65; 95% CI 0.45, 0.93).

**Conclusions** In line with on-going secular trend, the overall prevalence of smoking continued to decrease following the 2008 economic crisis in Iceland. Income increase during the period 2007-2009 was strongly associated with having relapsed in 2009, particularly among men, offering support for a pro-cyclical association between smoking and income. [Yet the findings must be taken with caution, as they are based on a low number of subjects.](#)

### Article Summary

#### Article Focus

- ◆ An examination on the association between economic crises and smoking behaviours, i.e. is a change in income related to a change in smoking status?
- ◆ [What is the role of stress change on an individual's propensity to relapse or quit smoking?](#)

#### Key Messages

- ◆ Evidence for the association between increased income and increased risk of smoking relapse following an economic collapse.
- ◆ Evidence for an association between decreased income and decreased risk of relapse.
- ◆ Gender differences in smoking—represented by higher female prevalence rates and decreased likelihood of quitting for females compared to males.

#### Strengths and limitations of this study

- ◆ A representative prospective cohort study assessed at two time points, which straddle the start of a severe economic crisis.

Formatted: Indent: Left: 0.5", Space After: 0 pt, Line spacing: single, No bullets or numbering

- 1  
2  
3  
4  
5  
6  
7  
8  
9  
10  
11  
12  
13  
14  
15  
16  
17  
18  
19  
20  
21  
22  
23  
24  
25  
26  
27  
28  
29  
30  
31  
32  
33  
34  
35  
36  
37  
38  
39  
40  
41  
42  
43  
44  
45  
46  
47  
48  
49  
50  
51  
52  
53  
54  
55  
56  
57  
58  
59  
60
- ◆ Due to the low number of individuals that change their smoking behaviours in a short period, we were unable to assess the effects of ~~an unemployment change~~ [a change in employment](#) on smoking habits.
  - ◆ [Findings are based on a low number of subjects and must be taken with caution.](#)

1  
2  
3  
4  
5  
6  
7  
8  
9  
10  
11  
12  
13  
14  
15  
16  
17  
18  
19  
20  
21  
22  
23  
24  
25  
26  
27  
28  
29  
30  
31  
32  
33  
34  
35  
36  
37  
38  
39  
40  
41  
42  
43  
44  
45  
46  
47  
48  
49  
50  
51  
52  
53  
54  
55  
56  
57  
58  
59  
60

## Introduction

The Icelandic economy was severely affected by the global economic collapse of 2008. After a decade-long period of financial prosperity the nation was plunged into a recession of such severity that similar contractions had only been seen a handful of times before.<sup>1 2</sup>

Previous research on the health consequences of the Icelandic economic collapse has suggested adverse impacts on cardiovascular and mental health among women.<sup>3 4</sup> In the broader literature on economic crises and population health, however, it has been debated whether health moves in a pro-cyclical or counter-cyclical direction to macro-economic conditions. The work of Brenner beginning in the 1970s suggested that mortality is counter-cyclical, i.e. when the economy is down, mortality rates – in particular, suicides – rise.<sup>5</sup> However, in more recent years, a series of econometric studies have suggested that mortality is pro-cyclical, i.e. during economic contractions death rates decline.<sup>6 7 8 9</sup> There are plausible reasons for this unexpected finding – for instance, during the 1998 Korean financial crisis, economic activity was so depressed that there was a detectable decline in traffic-related mortality.<sup>10</sup> Others have speculated – without direct evidence – that people are more likely to be over-worked and “stressed” during economic booms than during busts, having less time flexibility to engage in health promoting behaviours.<sup>11 12</sup>

Few studies, however, have used individual-level data to test the association between recession and health, especially smoking. Most of the evidence to date has been at the ecological level, though not all.<sup>13</sup> For instance, Shaw et al. found a direct association between economic hardship and a propensity to smoke.<sup>14</sup> Using U.S. data, Ruhm previously reported that economic recession was associated with a decline in the prevalence of cigarette smoking.<sup>12+2</sup> A recent report from Gallus et al. found that the recent economic contraction in Italy has given rise to an increase in the percentage of current smokers – primarily for females.<sup>15</sup> In the present study, we took advantage of the natural experiment afforded by the Icelandic crisis to examine the relationship between changes in economic conditions and smoking behaviour. Utilizing a prospective cohort of Icelandic adults assessed before (in 2007) and after the start of the collapse (in 2009), we sought to examine the risk of relapse among pre-collapse former smokers, as well as quitting behaviour among current smokers in terms of economic changes. Furthermore, because of the important role of perceived stress on smoking status, we sought to examine the potential influence of stress on the studied associations.<sup>16 17</sup>

Formatted: Superscript

## Methods

### Design and Samples

### Cohort

1  
2  
3  
4  
5  
6  
7  
8  
9 Our cohort is based on the *Health and Wellbeing in Iceland* health survey. Data was collected by  
10 a questionnaire in two waves: (1) from October to December of 2007 (10-12 months pre-  
11 collapse), then again (2) between November and December of 2009 (13-14 months post-  
12 collapse). The cohort was based on a stratified random sample of the Icelandic population  
13 (n=9807), which was selected from 12 strata: consisting of two geographic regions further  
14 stratified by six age groups. Of the initial 9807, a total of 5918 responded to the initial 2007  
15 assessment (response rate of 60.3%), with 4092 responding again to the modified version of the  
16 survey in 2009 (response rate of 82.8% of those who responded to the pre-collapse baseline  
17 survey). Because of the importance of stress as a potential predictor of smoking behaviour, we  
18 excluded individuals who did not have complete responses to the *Perceived Stress Scale* in both  
19 2007 and 2009. This left a final analytical sample of n=3755. Figure 1 shows the cohort attrition  
20 over questionnaire waves.  
21

## 22 Measures

### 23 *Smoking status and behaviour*

24  
25 In the questionnaire, we inquired about smoking status, i.e. whether respondents were current  
26 smokers, had quit smoking, or had never smoked. In order to examine the likelihood of relapsing  
27 or quitting following an economic collapse, respondents were stratified according to their  
28 smoking status: non-smoker, relapsed, and quit smoking.  
29  
30

31 Non-smoker: An individual was classified as a non-smoker if they responded that they did not  
32 currently smoke on both the 2007 and 2009 assessments.  
33

34 Relapsed smoker: An individual was identified as relapsed if they indicated that they (a) were a  
35 former smoker on the 2007 questionnaire, but indicated they had (b) smoked in any frequency in  
36 2009. In our analyses estimating the odds ratios of relapse, the base population was restricted to  
37 individuals who were former smokers at baseline.  
38

39 Quit smoking: A respondent that had quit smoking must have indicated that they were (a)  
40 currently smoking in 2007, yet had (b) quit smoking by 2009. In our analyses estimating the odds  
41 ratios of quitting, our base population was restricted to individuals who were current smokers at  
42 baseline.  
43

### 44 *Change in economic status*

45  
46 Additional socio-economic questions pertained to employment and income status. Household  
47 income was classified into income ranges of (in terms of Icelandic currency; ISK) (1) low ( $\leq 3.4$   
48 million ISK), (2) middle (3.5-9.4 million ISK), and (3) high ( $\geq 9.5$  million ISK); corresponding  
49 approximately to (1)  $\leq 28,000$  USD, (2) 28,000-77,000 USD, and (3)  $\geq 77,000$  USD. For  
50 analysis of income change, household income was further dichotomized into either high or “low”  
51 (which combined the middle & low income categories). We examined two types of income  
52  
53  
54  
55  
56  
57  
58  
59  
60



1  
2  
3  
4  
5  
6  
7  
8  
9  
10  
11  
12  
13  
14  
15  
16  
17  
18  
19  
20  
21  
22  
23  
24  
25  
26  
27  
28  
29  
30  
31  
32  
33  
34  
35  
36  
37  
38  
39  
40  
41  
42  
43  
44  
45  
46  
47  
48  
49  
50  
51  
52  
53  
54  
55  
56  
57  
58  
59  
60

change: a) drop in income between 2007 and 2009 from high to low; and b) a rise in income between 2007 and 2009 from low to high.

#### *Change in perceived stress*

Psychological stress was measured in both 2007 and 2009 using the four-item Perceived Stress Scale (PSS-4).<sup>18</sup> The PSS-4 is a shortened, validated, and acceptable substitute for the original scale,<sup>19</sup> with scores ranging from 0-16; the higher the score, the higher the perceived stress. An increase in stress was classified as any increase from baseline to follow-up; conversely, a decrease was classified as any decrease from baseline to follow-up. For example, an individual with a score of 5 in 2007 and a score of 10 in 2009 would be classified as having an increase in stress.

#### *Explanatory variables and demographics*

Our regression models controlled for the following socio-demographic covariates: age, sex, marital status, and education. Education was categorized as (1) basic (completed primary school or less), (2) middle (completed high school or equivalent), and (3) university (a completed university degree). [Employment status was categorized as \(1\) employed, \(2\) unemployed, \(3\) student \(4\) homemaker/paternal leave, \(5\) retired, and \(6\) disabled.](#)

#### **Statistical analyses**

Table 1 presents the distribution of socio-demographic characteristics according to change in smoking status between 2007 and 2009.

Binary logistic regression was used to estimate odds ratio (corresponding 95% confidence intervals) of relapse in 2009 (table 2), and the odds of quitting smoking in 2009 (table 3) by background characteristics, change in income and stress levels. Analyses were also stratified by gender. Models were adjusted for age and sex; models for household income and income change were additionally adjusted for baseline income levels. As previous research supports the role of stress as a mediator of an individual's propensity to change smoking status,<sup>16,17,21</sup> we also ran models of relapse and cessation with and without the inclusion of (1) changes in stress levels between 2007 and 2009 and (2) baseline stress levels.

Repeated measures ANOVA (p-values, F statistic) was used to examine overall and gender-specific mean differences in stress levels from 2007 to 2009 (table 4). Statistical analyses were conducted with IBM SPSS Statistics version 19.0 (SPSS Inc, Chicago, Illinois). Statistical significance was set at the 0.05 level, and all tests were 2-tailed.

## **Results**

### **Baseline characteristics**

Formatted: Superscript

Formatted: Superscript

Formatted: Superscript

1  
2  
3  
4  
5  
6  
7  
8  
9 Table 1 describes the baseline characteristics of the cohort in 2007 (n=3755), which was 53.0%  
10 female, 76.7% married/cohabiting, and with a mean (SD) age of 52.3 (16.0). Table 1 also  
11 describes the characteristics of those that had relapsed and quit: 72.2% (n=2711) of the cohort  
12 were non-smokers, 4.0% (n=56) of the former smokers at baseline had relapsed in 2009, and  
13 22.2% (n=149) of smokers at baseline had quit smoking in 2009. A significant reduction (P <  
14 0.01) in the prevalence of smokers was observed from 2007 to 2009 in both males (17.4% to  
15 14.8%) and females (20.0% to 17.5%).  
16

### 17 **Relapse smoking**

18  
19 Among individuals who were former smokers at baseline (table 2), decreased odds of relapsing  
20 in 2009 (after the collapse) were observed in the older age groups (compared to those aged 18-  
21 39), regardless of gender (age of 40-59: odds ratio 0.38; 95% confidence interval 0.21, 0.69 | age  
22 ≥ 60: 0.10; 0.04, 0.23).  
23

24 While an individual's employment status was not involved in their risk of relapsing, retired  
25 females showed a significant increased risk of relapsing (4.12; 1.11, 15.29), compared to the  
26 employed.  
27

28 Among men in the lower income groups at baseline (i.e. low, middle), those who moved into the  
29 high income group in 2009 experienced an increased risk of relapse (4.02; 1.15, 14.00)—while  
30 among those in the high income group at baseline, those whose incomes dropped had a decreased  
31 risk of relapsing (0.37; 0.16, 0.85). Further adjustments for a change in stress levels from 2007 to  
32 2009, showed limited attenuation in the coefficients, suggesting some mediation by perceived  
33 stress – i.e. former smokers whose incomes increased between 2007 and 2009 may have relapsed  
34 in part because of an increase in stress.  
35

### 36 **Smoking cessation**

37  
38 Females were less likely to quit smoking in 2009 (0.65; 0.45, 0.93), compared to males. An  
39 increased likelihood of quitting in 2009 was observed among the following female groups: those  
40 with middle (2.78; 1.48, 5.21) or university-level (2.73; 1.38, 5.40) education compared to a  
41 basic, and the disabled (3.42; 1.23, 9.52) compared to the employed. Compared to females aged  
42 18-29, those in the middle-aged group (0.46; 0.26, 0.83) were less likely to quit. Additional  
43 adjustments for a change in stress levels from baseline to follow-up in the cessation models  
44 revealed no diminished significance in effect sizes.  
45

### 46 **Stress and smoking**

47  
48 Though stress change ([increase vs. stable](#), [decrease vs. stable](#)) did not predict a relapse in females  
49 [in aforementioned analyses](#), further examination of changes in stress levels among smoking  
50 status; displayed a significant change in mean stress levels (SD) among females that had  
51  
52  
53  
54  
55  
56  
57  
58  
59  
60

relapsed, with a significant increase in stress scores from 3.96 (2.52) in 2007 to 5.24 (3.46) (P 0.01; F = 7.67).

## Discussion

In response to the severe economic collapse in Iceland, we found that the prevalence of smoking continued to decrease for both genders in the short period after. This drop in smoking may be attributed to background secular trends,<sup>20</sup> while other factors, such as changes in the price of cigarettes, change of priorities in the favour of more health promoting behaviours or anti-smoking campaigns, may also play a role. The strength of our study is that we were able to document changes in individual economic status straddling the economic downturn and link these exposures to individual changes in smoking habits. Additionally, in comparison to national smoking rates (2007: 23.0% of population; 2009: 19.0%) the prevalence rates from 2007 to 2009 of this sample are relatively analogous – offering support for the generalizability of the sample.

Our findings partially corroborate previous research on the pro-cyclical nature of the association between economic downturns and smoking habit, i.e. during recessions, smoking habits may be dampened. Among male former smokers, those who experienced a decline in income during the economic recession had a significantly lower risk of relapse two years later. Conversely, among men whose incomes increased during the period of recession, their risk of relapse was considerably higher compared to those whose incomes stayed the same. Although the direction of associations was similar among women, none of the estimates were statistically significant.

Taken together, the main significant finding of our analyses is that male former smokers whose incomes fell during the period of the economic collapse experienced a reduced risk of relapse. Ruhm hypothesized that this risk reduction is possibly driven by a tendency to adopt healthier behaviours during periods of reduced income – driven by an increase in positive health behaviours (i.e. exercise) that accompanies newly acquired increased leisure time during economic contractions.<sup>21</sup> It could also be argued their behaviour change in a recession can be either intentional or inadvertent. When facing enforced economic inactivity – individuals may choose to fill their time by actively investing in positive personal health changes, which include stopping smoking or joining a fitness club. It is equally plausible that a drop in income involuntarily forces smokers to give up their habit. However, our results did not indicate an increased risk of quitting among those whose incomes fell – which is inconsistent with the latter hypothesis, as well as previous research by Siahpush & Carlin.<sup>22</sup>

Foremost, our findings support Ruhm's theory of the positive effects of recessions on a population's health behaviours.<sup>12,13</sup> Ruhm revealed an association between markers (e.g. unemployment) of economic downturns and reductions in smoking, with an increase being seen during economic expansion. Though tobacco products are likely to be procyclical goods, as

Formatted: Superscript

Ruhm further points out, offering some explanation of the decrease we observed, it does not explain all of the mechanisms involved.

We caution that our findings regarding recession, income change, and smoking habits cannot be generalized to other health outcomes. For example, observational reports found a spike in female cardiac emergency visits during the week corresponding to the economic collapse in October of 2008.<sup>3</sup> In accordance with this, our previous analysis on changes in mental health revealed significant increases in stress for mainly women.<sup>4</sup> This increase in stress for women, however threatening to related health outcomes, did not prove to be associated with an increased likelihood of relapsing.

Our findings are also congruent with multiple models explaining the link between stress levels and smoking behaviour. Though much research shows stress as a cause of smoking,<sup>16+5 17+6</sup> additional research actually points to cigarette smoking as a cause of stress and, furthermore, smoking cessation as leading to a reduction in stress.<sup>23</sup> This is in line with our findings, as both male and female relapsed smokers had the lowest levels of stress before the collapse when they considered themselves as having quit smoking in 2007 (table 4), yet experienced an increase in stress post-collapse—significantly for women. This may also point to a vulnerability of this group to use smoking as a means of alleviating stress—explaining their relapse in smoking after the collapse.<sup>24</sup> This vulnerability has been discussed and supported by previous research showing economic stress as a cause of adverse mental health.<sup>25</sup> This increased stress may have also been amplified by a return to smoking, as Cohen & Lichtenstein have found.<sup>26</sup> Caution is warranted in interpreting the findings on stress, however, since smokers may be citing an increase in perceived stress to justify their relapse or failure to quit. We cannot conclusively argue that stress did not play a mediating role in the association between income change and smoking behaviour because of measurement error.

### Study limitations

Some limitations of our study should be noted. Relapsed smokers and quitters represent a small proportion of the population, and hence our odds ratios were estimated with imprecision and must be interpreted with caution. Similarly, we lacked statistical power to directly examine the effects of a change in employment status on change in smoking habits. In other words, though we were able to examine the effects of income change, we were not able to directly estimate the effects of unemployment as there were too few individuals in the sample who lost their jobs between 2007 and 2009. While our findings are based on the potential effects of an economic crisis on a change in smoking status, it is not clear whether these similar findings would hold true in normal scenarios and, thus, caution is warranted when generalizing our findings to other normative scenarios. Finally, smoking status was based on self-report only, and not validated by biomarkers such as cotinine. This may have produced misclassification of the outcome, though it is not clear whether this misclassification was differential by exposure status (e.g. income changes).

Formatted: Superscript

Formatted: Superscript

1  
2  
3  
4  
5  
6  
7  
8  
9  
10  
11  
12  
13  
14  
15  
16  
17  
18  
19  
20  
21  
22  
23  
24  
25  
26  
27  
28  
29  
30  
31  
32  
33  
34  
35  
36  
37  
38  
39  
40  
41  
42  
43  
44  
45  
46  
47  
48  
49  
50  
51  
52  
53  
54  
55  
56  
57  
58  
59  
60

## Conclusions

Our large population-based cohort with assessment points straddling the 2008 economic crisis in Iceland revealed a reduction in smoking rates from the short periods before and after the start of the crisis - though our study could not disentangle the direct effects of the crisis with other mechanisms, e.g. secular trends, changing cigarette prices. Chiefly, this examination revealed a decisive role of income change on the risk of relapsing after the collapse among former male smokers.

## Notes

**Contributors:** CM and IK (study guarantor) were responsible for the design of the study and preparation of the manuscript. CM conducted data analyses. AH and UV obtained funding. All contributors interpreted the data, contributed to the writing of the paper and approved the final version of the manuscript.

**Funding:** The project was funded in part by the Icelandic Centre for Research (RANNÍS). The authors are responsible for the manuscript's content, not the funding bodies.

**Competing interests:** All authors have completed the Unified Competing Interest form at [www.icmje.org/coi\\_disclosure.pdf](http://www.icmje.org/coi_disclosure.pdf) (available on request from the corresponding author) and declare: no other authors had financial relationships with any organisations that might have an interest in the submitted work in the previous 3 years.

**Ethical approval:** The study was approved by the Ethics Review Board of Iceland (09-094) and the Data Protection Authority of Iceland (S4455).

**Data sharing:** No additional data available.

## Figures and Tables

Figure 1- The cohort of the “Health and well-being”-study.

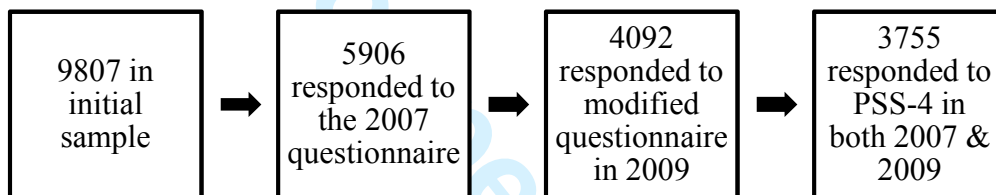

Table 1 – Baseline characteristics (in 2007) of the cohort and among differential smoking status

|                           | Cohort                   | Relapsed in 2009 | Quit Smoking in 2009 |
|---------------------------|--------------------------|------------------|----------------------|
| <b>n</b>                  | 3755                     | 56               | 160                  |
| Age Mean ± SD             | 52.3 ± 16.0              | 45.7 ± 14.2      | 47.4 ± 15.5          |
| <b>Sex</b>                | <b>n (% of category)</b> |                  |                      |
| Male                      | 1763 (47.0)              | 31 (55.4)        | 82 (51.3)            |
| Female                    | 1992 (53.0)              | 25 (44.6)        | 78 (48.8)            |
| <b>Marital status</b>     |                          |                  |                      |
| Single/Divorced           | 556 (14.9)               | 7 (13.0)         | 31 (19.9)            |
| Committed, not cohabiting | 131 (3.5)                | 2 (3.7)          | 9 (5.8)              |
| Married, cohabiting       | 2871 (76.7)              | 45 (83.3)        | 116 (74.4)           |
| <b>Education</b>          |                          |                  |                      |
| Basic                     | 1688 (47.1)              | 22 (40.7)        | 65 (42.5)            |
| Middle                    | 971 (27.1)               | 15 (27.8)        | 51 (33.3)            |
| University                | 928 (25.9)               | 17 (31.5)        | 37 (24.2)            |
| <b>Employment status</b>  |                          |                  |                      |
| Employed                  | 2019 (58.4)              | 37 (71.2)        | 98 (64.5)            |
| Unemployed                | 169 (4.9)                | 3 (5.8)          | 10 (6.6)             |
| Student                   | 122 (3.5)                | 1 (1.9)          | 5 (3.3)              |
| Homemaker/Paternal Leave  | 159 (4.6)                | 2 (3.8)          | 9 (5.9)              |
| Retired                   | 872 (25.2)               | 4 (7.7)          | 24 (15.8)            |
| Disabled                  | 119 (3.4)                | 5 (9.6)          | 6 (3.9)              |
| <b>Household income</b>   |                          |                  |                      |

|        |             |           |           |
|--------|-------------|-----------|-----------|
| Low    | 621 (20.6)  | 8 (17.0)  | 22 (16.5) |
| Middle | 1855 (61.4) | 25 (53.2) | 80 (60.2) |
| High   | 543 (18.0)  | 14 (29.8) | 31 (23.3) |

Table 2 – The odds ratio of relapsing in 2009 among those who had quit smoking at the baseline (2007)

|                                                                   |                      | OR (95% CI) a |                   |                    |  |
|-------------------------------------------------------------------|----------------------|---------------|-------------------|--------------------|--|
| 2009 Status                                                       |                      | Overall       | Male              | Female             |  |
|                                                                   |                      |               | Ref               | 0.67 (0.38, 1.18)  |  |
| <b>Household income in 2009 b</b>                                 |                      | <b>n *</b>    |                   |                    |  |
|                                                                   | Low                  | 8             | 0.66 (0.26, 1.70) | 1.13 (0.24, 5.36)  |  |
|                                                                   | Middle               | 25            | 1.57 (0.48, 5.17) | 2.28 (0.38, 13.55) |  |
|                                                                   | High                 | 17            | Ref               | Ref                |  |
| <b>Household income in 2009 (among high income at baseline) b</b> |                      |               |                   |                    |  |
|                                                                   | High income in 2009  | 285           | Ref               | Ref                |  |
|                                                                   | Lower income in 2009 | 469           | 0.53 (0.28, 1.01) | 0.37 (0.16, 0.85)  |  |
| <b>Household income in 2009 (among low incomes at baseline) b</b> |                      |               |                   |                    |  |
|                                                                   | High income in 2009  | 23            | 3.14 (1.27, 7.72) | 4.02 (1.15, 14.00) |  |
|                                                                   | Lower income in 2009 | 7             | Ref               | Ref                |  |
| <b>Change in stress from 2007 to 2009 c</b>                       |                      |               |                   |                    |  |
|                                                                   | Same                 | 7             | Ref               | Ref                |  |
|                                                                   | Decreased            | 15            | 0.91 (0.35, 2.36) | 0.83 (0.23, 2.99)  |  |
|                                                                   | Increased            | 34            | 1.71 (0.86, 3.37) | 1.75 (0.68, 4.53)  |  |

\* Totals do not include missing values from 2009

a OR adjusted for statuses in 2009: age, sex

b OR adjusted for statuses in 2009: age, sex, baseline income in 2007

c OR additionally adjusted for baseline stress (2007)

Table 3 - The odds ratio of smoking cessation in 2009 among those who were smokers at the baseline (2007)

|                                                                   |                      | OR (95% CI) a |                   |                   |
|-------------------------------------------------------------------|----------------------|---------------|-------------------|-------------------|
| 2009 Status                                                       |                      | Overall       | Male              | Female            |
|                                                                   |                      |               | Ref               | 0.65 (0.45, 0.93) |
| <b>Household income in 2009 b</b>                                 |                      | <b>n *</b>    |                   |                   |
|                                                                   | Low                  | 22            | 0.89 (0.49, 1.60) | 0.75 (0.33, 1.74) |
|                                                                   | Middle               | 80            | 0.98 (0.45, 2.13) | 0.80 (0.27, 2.38) |
|                                                                   | High                 | 31            | Ref               | Ref               |
| <b>Household income in 2009 (among high income at baseline) b</b> |                      |               |                   |                   |
|                                                                   | High income in 2009  | 96            | Ref               | Ref               |
|                                                                   | Lower income in 2009 | 326           | 0.75 (0.46, 1.22) | 0.82 (0.41, 1.62) |
| <b>Household income in 2009 (among low incomes at baseline) b</b> |                      |               |                   |                   |
|                                                                   | High income in 2009  | 898           | 0.68 (0.30, 1.55) | 0.61 (0.19, 1.97) |
|                                                                   | Lower income in 2009 | 8             | Ref               | Ref               |
| <b>Change in stress from 2007 to 2009 c</b>                       |                      |               |                   |                   |
|                                                                   | Same                 | 22            | Ref               | Ref               |
|                                                                   | Decreased            | 62            | 0.84 (0.47, 1.48) | 0.73 (0.34, 1.56) |
|                                                                   | Increased            | 76            | 0.98 (0.64, 1.51) | 0.66 (0.36, 1.22) |

\* Totals do not include missing values from 2009

a OR adjusted for statuses in 2009: age, sex

b OR adjusted for statuses in 2009: age, sex, baseline income in 2007

c OR additionally adjusted for baseline stress (2007)

Table 4 – Average stress levels according to smoking status – among waves (2007 & 2009)

|                     | 2007             | 2009             |               |
|---------------------|------------------|------------------|---------------|
|                     | Stress Mean (SD) | Stress Mean (SD) | p-value (F) ± |
| <b>Never smoker</b> |                  |                  |               |
| Male                | 3.70 (2.75)      | 3.83 (2.69)      | 0.31 (1.02)   |
| Female              | 4.18 (2.70)      | 4.40 (2.90)      | 0.44 (0.60)   |
| <b>Relapsed</b>     |                  |                  |               |
| Male                | 3.52 (2.28)      | 4.94 (2.80)      | 0.28 (1.20)   |
| Female              | 3.96 (2.52)      | 5.24 (3.46)      | 0.01 (7.67)   |



1  
2  
3  
4  
5  
6  
7  
8  
9  
10  
11  
12  
13  
14  
15  
16  
17  
18  
19  
20  
21  
22  
23  
24  
25  
26  
27  
28  
29  
30  
31  
32  
33  
34  
35  
36  
37  
38  
39  
40  
41  
42  
43  
44  
45  
46  
47  
48  
49  
50  
51  
52  
53  
54  
55  
56  
57  
58  
59  
60

| Quit smoking |             |             |             |
|--------------|-------------|-------------|-------------|
| Male         | 4.21 (2.71) | 4.16 (2.78) | 0.91 (0.01) |
| Female       | 4.38 (3.49) | 5.03 (3.35) | 0.13 (2.31) |

± Repeated measures ANOVA (p-values, F statistic) used to examine overall and gender-specific mean differences in stress levels from 2007 to 2009; adjusted for age in 2009

For peer review only

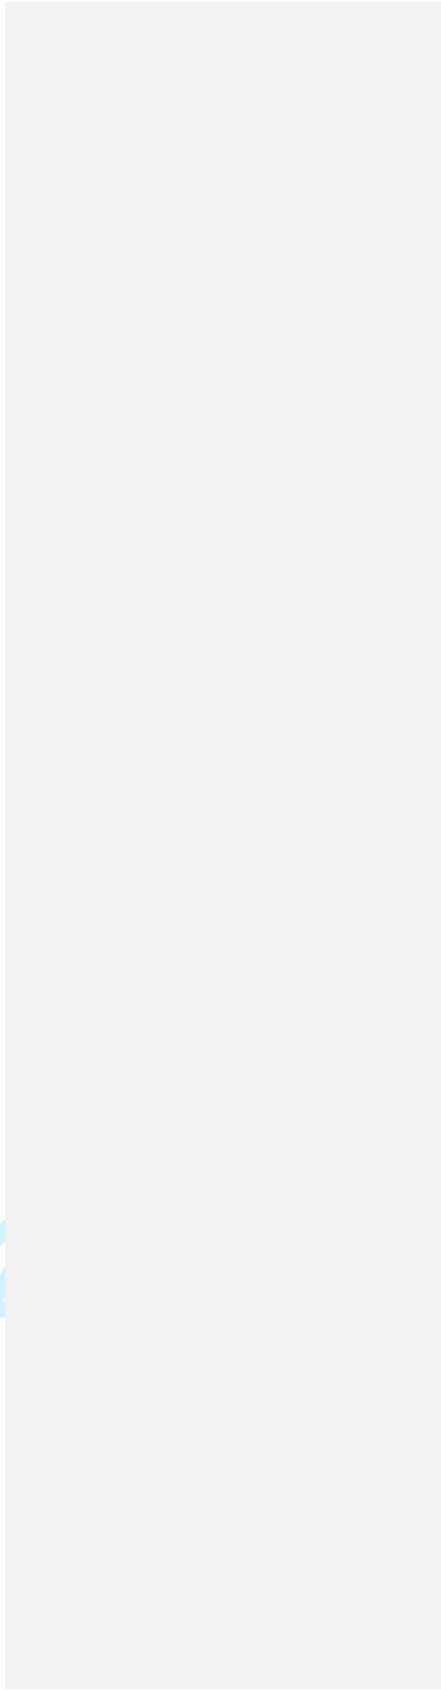

## References

- 1 Wade RG, Sigurgeirsdóttir S. Iceland's rise, fall, stabilisation and beyond. *Cambridge Journal of Economics* 2012;36:127-144.
- 2 Vaiman V, Sigurjonsson TO, Davidsson PA. Weak business culture as antecedents of economic crisis: the case of Iceland. *J Business Ethics* 2011;98(2).
- 3 Gudjonsdóttir GR, Kristjansson M, Olafsson O, Arna DO, Getz L, Sigurdsson JA, Gudmundsson S, Valdimarsdóttir U. Immediate surge in female visits to the cardiac emergency department following the economic collapse in Iceland: an observational study. *Emerg Med J* 2011. doi:10.1136/emermed-2011-200518
- 4 Hauksdóttir A, McClure C, Jónsson SH, Ólafsson Ö, Valdimarsdóttir U. Increased stress levels in women following an economic collapse. *Submitted* 2011.
- 5 Brenner HM. Relation of economic change to Swedish health and social well-being, 1950–1980. *Social Science & Medicine*. 1987;25(2):183–95.
- 6 Tapias Granados JA. Increasing mortality during the expansions of the US economy, 1900–1996. *Int J Epidemiol* 2005;34(6):1194–202.
- 7 Tapias Granados JA. Macroeconomic fluctuations and mortality in postwar Japan. *Demography* 2008;45(2):323–43.
- 8 Tapias Granados JA, Diez Roux AV. Life and death during the Great Depression. *PNAS* 2009;106(41):17290–5.
- 9 Stuckler D, Basu S, Suhrcke M, Coutts A, McKee M. The public health effect of economic crises and alternative policy responses in Europe: an empirical analysis. *Lancet* 2009;374: 315-323.
- 10 Khang Y-H, Lynch JW, Kaplan GA. Impact of economic crisis on cause-specific mortality in South Korea. *Int J Epidemiol* 2005;34(6):1291–1301.
- 11 Ruhm CJ. Good times make you sick. *Journal of Health Economics* 2003;22:637-658.
- 12 Ruhm CJ. Are recessions good for your health? *Q J Econ* 2000;115(2):617-650.
- 13 Shiahpush M, Carlin JB. Financial stress, smoking cessation and relapse: results from a prospective study of an Australian national sample. *Addiction* 2006;101(1):121-127.
- 14 Shaw B, Agahi N, Krause N. Are changes in financial strain associated with changes in alcohol use and smoking among older adults? *Journal of Studies on Alcohol and Drugs* 2011;72(6):917-925.
- 15 Gallus S, Tramacere I, Pacifici R, Zuccaro P, Colombo P, Ghislandi S, La Vecchia C. Smoking in Italy 2008-2009: a rise in prevalence related to the economic crisis? *Prev Med* 2011;52:182-183
- 16 Childs E, de Wit H. Effects of acute psychosocial stress on cigarette craving and smoking. *Nicotine Tob Res* 2010;12(4):449-453.
- 17 Tsourtos G, Ward PR, Muller R, Lawn S, Winefield AH, Hersh D, Coverney J. The importance of resilience and stress to maintaining smoking abstinence and cessation: a qualitative study in Australia with people diagnosed with depression. *Health & Social Care in the Community* 2011;19(3):299-306.
- 18 Cohen S, Kamarck T, Mermelstein R. A global measure of perceived stress. *J Health Soc Behav* 1983;24(4):385-396.
- 19 Cohen S, Williamson G. Perceived stress in a probability sample of the United States. In S. Spacapan S & Oskamp S (Eds.), *The social psychology of health: Claremont Symposium on applied social psychology* 1988. Newbury Park, CA: Sage.
- 20 Statistics Iceland. Lifestyle and health [Internet]. [cited 2012 Mar 22]. Available from: <http://www.statice.is/Statistics/Health,-social-affairs-and-justi/Lifestyle-and-health>
- 21 Ruhm CJ. Healthy living in hard times. *Journal of Health Economics* 2005;24(2):341–63.
- 22 Shiahpush M, Carlin JB. Financial stress, smoking cessation and relapse: results from a prospective study of an Australian national sample. *Addiction* 2006;101(1):121-127.
- 23 Parrott A. Does cigarette smoking cause stress? *American Psychologist* 1999;54(10):817-820.
- 24 Perkins KA, Grobe JE. Increased desire to smoke during acute stress. *British Journal of Addiction* 1992;87(7):1037-1040.
- 25 Aldwin CM, Revenson T. Vulnerability to economic stress. *Am J Community Psychology* 1986;14(2):161-175.
- 26 Cohen S, Lichtenstein E. Perceived stress, quitting smoking, and smoking relapse. *Health Psychol* 1990;9:466-478.

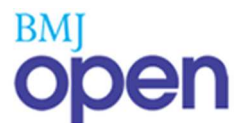

## Economic crisis and smoking behaviour: Prospective cohort study in Iceland

|                                 |                                                                                                                                                                                                                                                                                                                                                                                                                        |
|---------------------------------|------------------------------------------------------------------------------------------------------------------------------------------------------------------------------------------------------------------------------------------------------------------------------------------------------------------------------------------------------------------------------------------------------------------------|
| Journal:                        | <i>BMJ Open</i>                                                                                                                                                                                                                                                                                                                                                                                                        |
| Manuscript ID:                  | bmjopen-2012-001386.R3                                                                                                                                                                                                                                                                                                                                                                                                 |
| Article Type:                   | Research                                                                                                                                                                                                                                                                                                                                                                                                               |
| Date Submitted by the Author:   | 04-Sep-2012                                                                                                                                                                                                                                                                                                                                                                                                            |
| Complete List of Authors:       | McClure, Christopher; Centre of Public Health Sciences, University of Iceland, Department of Medicine<br>Valdimarsdttir, Unnur; Centre of Public Health Sciences, University of Iceland, Department of Medicine<br>Hauksdóttir, Arna; Centre of Public Health Sciences, University of Iceland, Department of Medicine<br>Kawachi, Ichiro; Harvard School of Public Health, Department of Society Human Development and |
| <b>Primary Subject Heading</b>: | Smoking and tobacco                                                                                                                                                                                                                                                                                                                                                                                                    |
| Secondary Subject Heading:      | Public health, Epidemiology, Mental health, Health economics, Addiction                                                                                                                                                                                                                                                                                                                                                |
| Keywords:                       | PUBLIC HEALTH, Adult psychiatry < PSYCHIATRY, EPIDEMIOLOGY, MENTAL HEALTH, Health economics < HEALTH SERVICES ADMINISTRATION & MANAGEMENT                                                                                                                                                                                                                                                                              |
|                                 |                                                                                                                                                                                                                                                                                                                                                                                                                        |

SCHOLARONE™  
Manuscripts

only

# Economic crisis and smoking behaviour: Prospective cohort study in Iceland

Christopher B. McClure, *doctoral student*,<sup>1,3</sup> Unnur A. Valdimarsdóttir, *associate professor and chair*,<sup>1</sup> Arna Hauksdóttir, *assistant professor*<sup>1</sup>, Ichiro Kawachi, *professor and chair*<sup>2</sup>

1. Centre of Public Health Sciences, University of Iceland, Stapi on Hringbraut, 101 Reykjavik, Iceland
2. Department of Society, Human Development, and Health, Harvard School of Public Health, 677 Huntington Avenue, Kresge Building 7th Floor, Boston, Massachusetts 02115, USA
3. College of Public Health and Human Sciences, Oregon State University, 123 Women's Building, Corvallis, Oregon 97331, USA

**Correspondence to:** C McClure [cbm1@hi.is](mailto:cbm1@hi.is)

“The Corresponding Author has the right to grant on behalf of all authors and does grant on behalf of all authors, a worldwide licence to the Publishers and its licensees in perpetuity, in all forms, formats and media (whether known now or created in the future), to i) publish, reproduce, distribute, display and store the Contribution, ii) translate the Contribution into other languages, create adaptations, reprints, include within collections and create summaries, extracts and/or, abstracts of the Contribution, iii) create any other derivative work(s) based on the Contribution, iv) to exploit all subsidiary rights in the Contribution, v) the inclusion of electronic links from the Contribution to third party material where-ever it may be located; and, vi) licence any third party to do any or all of the above.”

## Abstract

**Objective** To examine the associations between the 2008 economic collapse in Iceland and smoking behaviour at the national and individual levels.

**Design** A population-based, prospective cohort study based on a mail survey (*Health and Wellbeing in Iceland*) assessed in 2007 and 2009.

**Setting** National mail survey

**Participants** Representative cohort (n=3755) of Icelandic adults.

**Main outcome measure** Smoking status.

**Results** A significant reduction in the prevalence of smoking was observed from 2007 (pre-economic collapse) to 2009 (post-collapse) in both males (17.4% to 14.8%; P 0.01) and females (20.0% to 17.5%; P 0.01) in the cohort (n= 3755). At the individual level of analysis, male former smokers experiencing a reduction in income during the same period were less likely to relapse (OR 0.37; 95% CI 0.16, 0.85). Female smokers were less likely to quit over time compared to males (OR 0.65; 95% CI 0.45, 0.93). Among male former smokers who experienced an increase in income between 2007 and 2009, we observed an elevated risk of smoking relapse (OR 4.02; 95% CI 1.15, 14.00).

**Conclusions** The national prevalence of smoking in Iceland declined following the 2008 economic crisis. This could be due to the pro-cyclical relationship between macro-economic conditions and smoking behaviour (i.e. hard times lead to less smoking because of lower affordability), or it may simply reflect a continuation of trends already in place prior to the crisis. In individual-level analysis, we find that former smokers who experienced a decline in income were less likely to relapse; and conversely, an increase in income raises the risk. However, caution is warranted since these findings are based on small numbers.

### Article Summary

#### Article Focus

- ◆ An examination on the association between economic crises and smoking behaviours, i.e. is change in income (at both the national and individual levels) related to a change in smoking status?

#### Key Messages

- ◆ National smoking prevalence declined in Iceland following the 2008 economic crisis.
- ◆ In individual-level analysis, male former smokers whose incomes declined experienced a reduced risk of smoking relapse.
- ◆ Conversely, an increase in income from 2007-2009 was associated with increased risk of relapse.

- ◆ Our findings are consistent with the hypothesis that economic downturns may result in decreased tobacco use (procyclical effect).

#### **Strengths and limitations of this study**

- ◆ A representative prospective cohort study assessed at two time points, which straddle the start of a severe economic crisis.
- ◆ Due to the low number of individuals that change their smoking behaviours in a short period, we were unable to assess the effects of a change in employment on smoking habits.
- ◆ Findings are based on a low number of subjects and must be taken with caution.

For peer review only

## Introduction

The Icelandic economy was severely affected by the global economic collapse of 2008. After a decade-long period of financial prosperity the nation was plunged into a recession of great severity, resulting in a severe currency crisis, as well as a drastic increase in national and household debts, runaway unemployment rates, and decreased per capita purchasing power.<sup>1 2</sup>

Previous research on the health consequences of the Icelandic economic collapse has suggested adverse impacts on cardiovascular and mental health among women.<sup>3 4</sup> In the broader literature on economic crises and population health, however, it has been debated whether health moves in a pro-cyclical or counter-cyclical direction to macro-economic conditions. The work of Brenner beginning in the 1970s suggested that mortality is counter-cyclical, i.e. when the economy is down, mortality rates – in particular, suicides – rise.<sup>5</sup> However, in more recent years, a series of econometric studies have suggested that mortality is pro-cyclical, i.e. during economic contractions death rates decline.<sup>6 7 8 9</sup> There are plausible reasons for this unexpected finding – for instance, during the 1998 Korean financial crisis, economic activity was so depressed that there was a detectable decline in traffic-related mortality.<sup>10</sup> Others have speculated – without direct evidence – that people are more likely to be over-worked and “stressed” during economic booms than during busts, having less time flexibility to engage in health promoting behaviours.<sup>11</sup>

Few studies, however, have used individual-level data to test the association between recession and health, especially smoking. Most of the evidence to date has been at the ecological level, though not all.<sup>13</sup> For instance, Shaw et al. found a direct association between economic hardship and a propensity to smoke.<sup>14</sup> Using U.S. data, Ruhm previously reported that economic recession was associated with a decline in the prevalence of cigarette smoking.<sup>12 12</sup> A recent report from Gallus et al. found that the recent economic contraction in Italy has given rise to an increase in the percentage of current smokers – primarily for females.<sup>15</sup> In the present study, we took advantage of the natural experiment afforded by the Icelandic crisis to examine the relationship between changes in economic conditions and smoking behaviour. Utilizing a prospective cohort of Icelandic adults assessed before (in 2007) and after the start of the collapse (in 2009), we sought to examine the risk of relapse among pre-collapse former smokers, as well as quitting behaviour among current smokers in terms of economic changes. Furthermore, because of the important role of perceived stress on smoking status, we sought to examine the potential influence of stress on the studied associations.<sup>16 17</sup>

## Methods

### Design and Samples

### Cohort

1  
2  
3 Our cohort is based on the *Health and Wellbeing in Iceland* health survey. Data was collected by  
4 a questionnaire in two waves: (1) from October to December of 2007 (10-12 months pre-  
5 collapse), then again (2) between November and December of 2009 (13-14 months post-  
6 collapse). The cohort was based on a stratified random sample of the Icelandic population  
7 (n=9807), which was selected from 12 strata: consisting of two geographic regions further  
8 stratified by six age groups. Of the initial 9807, a total of 5918 responded to the initial 2007  
9 assessment (response rate of 60.3%), with 4092 responding again to the modified version of the  
10 survey in 2009 (response rate of 82.8% of those who responded to the pre-collapse baseline  
11 survey). Because of the importance of stress as a potential predictor of smoking behaviour, we  
12 excluded individuals who did not have complete responses to the *Perceived Stress Scale* in both  
13 2007 and 2009. This left a final analytical sample of n=3755. Figure 1 shows the cohort attrition  
14 over questionnaire waves.  
15  
16  
17  
18  
19

## 20 Measures

### 21 *Smoking status and behaviour*

22  
23  
24  
25 In the questionnaire, we inquired about smoking status, i.e. whether respondents were current  
26 smokers, had quit smoking, or had never smoked. In order to examine the likelihood of relapsing  
27 or quitting following an economic collapse, respondents were stratified according to their  
28 smoking status: non-smoker, relapsed, and quit smoking.  
29  
30

31 Non-smoker: An individual was classified as a non-smoker if they responded that they did not  
32 currently smoke on both the 2007 and 2009 assessments.  
33  
34

35 Relapsed smoker: An individual was identified as relapsed if they indicated that they (a) were a  
36 former smoker on the 2007 questionnaire, but indicated they had (b) smoked in any frequency in  
37 2009. In our analyses estimating the odds ratios of relapse, the base population was restricted to  
38 individuals who were former smokers at baseline.  
39  
40

41 Quit smoking: A respondent that had quit smoking must have indicated that they were (a)  
42 currently smoking in 2007, yet had (b) quit smoking by 2009. In our analyses estimating the odds  
43 ratios of quitting, our base population was restricted to individuals who were current smokers at  
44 baseline.  
45  
46

### 47 *Change in economic status*

48  
49 Additional socio-economic questions pertained to employment and income status. Household  
50 income was classified into income ranges of (in terms of Icelandic currency; ISK) (1) low ( $\leq 3.4$   
51 million ISK), (2) middle (3.5-9.4 million ISK), and (3) high ( $\geq 9.5$  million ISK); corresponding  
52 approximately to (1)  $\leq 28,000$  USD, (2) 28,000-77,000 USD, and (3)  $\geq 77,000$  USD. For  
53 analysis of income change, household income was further dichotomized into either high or “low”  
54 (which combined the middle & low income categories). We examined two types of income  
55  
56  
57  
58  
59  
60



change: a) drop in income between 2007 and 2009 from high to low; and b) a rise in income between 2007 and 2009 from low to high.

### *Change in perceived stress*

Psychological stress was measured in both 2007 and 2009 using the four-item Perceived Stress Scale (PSS-4).<sup>18</sup> The PSS-4 is a shortened, validated, and acceptable substitute for the original scale,<sup>19</sup> with scores ranging from 0-16; the higher the score, the higher the perceived stress. An increase in stress was classified as any increase from baseline to follow-up; conversely, a decrease was classified as any decrease from baseline to follow-up. For example, an individual with a score of 5 in 2007 and a score of 10 in 2009 would be classified as having an increase in stress.

### *Explanatory variables and demographics*

Our regression models controlled for the following socio-demographic covariates: age, sex, marital status, and education. Education was categorized as (1) basic (completed primary school or less), (2) middle (completed high school or equivalent), and (3) university (a completed university degree). Employment status was categorized as (1) employed, (2) unemployed, (3) student (4) homemaker/paternal leave, (5) retired, and (6) disabled.

### **Statistical analyses**

Table 1 presents the distribution of socio-demographic characteristics according to change in smoking status between 2007 and 2009.

Binary logistic regression was used to estimate odds ratio (corresponding 95% confidence intervals) of relapse in 2009 (table 2), and the odds of quitting smoking in 2009 (table 3) by background characteristics, change in income and stress levels. Analyses were also stratified by gender. Models were adjusted for age and sex; models for household income and income change were additionally adjusted for baseline income levels. As previous research supports the role of stress as a mediator of an individual's propensity to change smoking status,<sup>16+5 17+6 232+</sup> we also ran models of relapse and cessation with and without the inclusion of (1) changes in stress levels between 2007 and 2009 and (2) baseline stress levels.

Repeated measures ANOVA (p-values, F statistic) was used to examine overall and gender-specific mean differences in stress levels from 2007 to 2009 (table 4). Statistical analyses were conducted with IBM SPSS Statistics version 19.0 (SPSS Inc, Chicago, Illinois). Statistical significance was set at the 0.05 level, and all tests were 2-tailed.

## **Results**

### **Baseline characteristics**

1  
2  
3 Table 1 describes the baseline characteristics of the cohort in 2007 (n=3755), which was 53.0%  
4 female, 76.7% married/cohabiting, and with a mean (SD) age of 52.3 (16.0). Table 1 also  
5 describes the characteristics of those that had relapsed and quit: 72.2% (n=2711) of the cohort  
6 were non-smokers, 4.0% (n=56) of the former smokers at baseline had relapsed in 2009, and  
7 22.2% (n=149) of smokers at baseline had quit smoking in 2009. A significant reduction (P <  
8 0.01) in the prevalence of smokers was observed from 2007 to 2009 in both males (17.4% to  
9 14.8%) and females (20.0% to 17.5%).  
10  
11  
12

### 13 **Relapse smoking**

14  
15  
16 Among individuals who were former smokers at baseline (table 2), decreased odds of relapsing  
17 in 2009 (after the collapse) were observed in the older age groups (compared to those aged 18-  
18 39), regardless of gender (age of 40-59: odds ratio 0.38; 95% confidence interval 0.21, 0.69 | age  
19 ≥ 60: 0.10; 0.04, 0.23).  
20  
21

22 While an individual's employment status was not involved in their risk of relapsing, retired  
23 females showed a significant increased risk of relapsing (4.12; 1.11, 15.29), compared to the  
24 employed.  
25  
26

27 Among men in the lower income groups at baseline (i.e. low, middle), those who moved into the  
28 high income group in 2009 experienced an increased risk of relapse (4.02; 1.15, 14.00)—while  
29 among those in the high income group at baseline, those whose incomes dropped had a decreased  
30 risk of relapsing (0.37; 0.16, 0.85). Further adjustments for a change in stress levels from 2007 to  
31 2009, showed limited attenuation in the coefficients, suggesting some mediation by perceived  
32 stress – i.e. former smokers whose incomes increased between 2007 and 2009 may have relapsed  
33 in part because of an increase in stress.  
34  
35  
36

### 37 **Smoking cessation**

38  
39  
40 Females were less likely to quit smoking in 2009 (0.65; 0.45, 0.93), compared to males. An  
41 increased likelihood of quitting in 2009 was observed among the following female groups: those  
42 with middle (2.78; 1.48, 5.21) or university-level (2.73; 1.38, 5.40) education compared to a  
43 basic, and the disabled (3.42; 1.23, 9.52) compared to the employed. Compared to females aged  
44 18-29, those in the middle-aged group (0.46; 0.26, 0.83) were less likely to quit. Additional  
45 adjustments for a change in stress levels from baseline to follow-up in the cessation models  
46 revealed no diminished significance in effect sizes.  
47  
48  
49

### 50 **Stress and smoking**

51  
52  
53 Though stress change (increase vs. stable, decrease vs. stable) did not predict a relapse in females  
54 in aforementioned analyses, further examination of changes in stress levels among smoking  
55 status displayed a significant change in mean stress levels (SD) among females that had relapsed,  
56  
57  
58  
59  
60

1  
2  
3 with a significant increase in stress scores from 3.96 (2.52) in 2007 to 5.24 (3.46) (P 0.01; F =  
4 7.67).  
5  
6  
7

## 8 9 **Discussion**

10  
11 In response to the severe economic collapse in Iceland, we found that the prevalence of smoking  
12 continued to decrease for both genders in the short period after. This drop in smoking may be  
13 attributed to background secular trends,<sup>20</sup> while other factors, such as changes in the price of  
14 cigarettes, and changing norms about the acceptability of smoking, may also have played a role.  
15 The strength of our study is that we were able to document changes in individual economic status  
16 straddling the economic downturn and link these exposures to individual changes in smoking  
17 habits. Additionally, in comparison to national smoking rates (2007: 23.0% of population; 2009:  
18 19.0%) the prevalence rates from 2007 to 2009 of this sample are relatively analogous – offering  
19 support for the generalizability of the sample.  
20  
21  
22  
23

24  
25 Our findings partially corroborate previous research on the pro-cyclical nature of the association  
26 between economic downturns and smoking habit, i.e. during recessions, smoking habits may be  
27 dampened. Among male former smokers, those who experienced a decline in income during the  
28 economic recession had a significantly lower risk of relapse two years later. Conversely, among  
29 men whose incomes increased during the period of recession, their risk of relapse was  
30 considerably higher compared to those whose incomes stayed the same. Although the direction  
31 of associations was similar among women, none of the estimates were statistically significant.  
32  
33  
34

35  
36 Taken together, the main significant finding of our analyses is that male former smokers whose  
37 incomes fell during the period of the economic collapse experienced a reduced risk of relapse.  
38 Ruhm hypothesized that this risk reduction is possibly driven by a tendency to adopt healthier  
39 behaviours during periods of reduced income – driven by an increase in positive health  
40 behaviours (i.e. exercise) that accompanies newly acquired increased leisure time during  
41 economic contractions.<sup>21</sup> It could also be argued their behaviour change in a recession can be  
42 either intentional or inadvertent. When facing enforced economic inactivity – individuals may  
43 choose to fill their time by actively investing in positive personal health changes, which include  
44 stopping smoking or joining a fitness club. However, our results did not indicate an increased  
45 risk of quitting among those whose incomes fell – which is inconsistent with previous research  
46 by Siahpush & Carlin.<sup>22</sup>  
47  
48  
49

50  
51 It is possible that smoking cessation and smoking relapse are “asymmetric” behaviors with  
52 different triggers. Thus, a former smoker who experiences a drop in income may be less tempted  
53 to start smoking again because of the reduced affordability of cigarettes. On the other hand,  
54 someone who is already smoking may be less sensitive to an income drop (higher income  
55 inelasticity) –i.e. he is unable to quit his ongoing behavior because of the offsetting increase in  
56 stress (although our data on self-reported stress did not support this).  
57  
58  
59  
60

1  
2  
3 There is an apparent discrepancy between the national decline in smoking in Iceland and the fact  
4 that smokers whose incomes declined were not more likely to quit. This underscores the point  
5 that macro-level data and individual-level patterns are often driven by a different set of causes.  
6 Thus, the overall decline in national smoking rates could be either due to the procyclical nature  
7 of smoking (i.e. recessions are good for health), or it may simply reflect a continuation of trends  
8 already in place prior to the recession (i.e. national anti-smoking campaigns, declining social  
9 acceptability of smoking, etc). In other words, national averages are driven by more than the  
10 group of smokers whose incomes decreased after the crisis.

11  
12 Furthermore, we caution that our findings regarding recession, income change, and smoking  
13 habits cannot be generalized to other health outcomes. For example, observational reports found  
14 a spike in female cardiac emergency visits during the week corresponding to the economic  
15 collapse in October of 2008.<sup>3</sup> In accordance with this, our previous analysis on changes in  
16 mental health revealed significant increases in stress for mainly women.<sup>4</sup> This increase in stress  
17 for women, however threatening to related health outcomes, did not prove to be associated with  
18 an increased likelihood of relapsing.

19  
20 Our findings are also congruent with multiple models explaining the link between stress levels  
21 and smoking behaviour. Though much research shows stress as a cause of smoking,<sup>16+5 17+6</sup>  
22 additional research actually points to cigarette smoking as a cause of stress and, furthermore,  
23 smoking cessation as leading to a reduction in stress.<sup>23</sup> This is in line with our findings, as both  
24 male and female relapsed smokers had the lowest levels of stress before the collapse when they  
25 considered themselves as having quit smoking in 2007 (table 4), yet experienced an increase in  
26 stress post-collapse—significantly for women. This may also point to a vulnerability of this  
27 group to use smoking as a means of alleviating stress—explaining their relapse in smoking after  
28 the collapse.<sup>24</sup> This vulnerability has been discussed and supported by previous research showing  
29 economic stress as a cause of adverse mental health.<sup>25</sup> This increased stress may have also been  
30 amplified by a return to smoking, as Cohen & Lichtenstein have found.<sup>26</sup> Caution is warranted in  
31 interpreting the findings on stress, however, since smokers may be citing an increase in  
32 perceived stress to justify their relapse or failure to quit. We cannot conclusively argue that stress  
33 did not play a mediating role in the association between income change and smoking behaviour  
34 because of measurement error.

### 45 46 **Study limitations**

47  
48 Some limitations of our study should be noted. Relapsed smokers and quitters represent a small  
49 proportion of the population, and hence our odds ratios were estimated with imprecision and  
50 must be interpreted with caution. Similarly, we lacked statistical power to directly examine the  
51 effects of a change in employment status on change in smoking habits. In other words, though  
52 we were able to examine the effects of income change, we were not able to directly estimate the  
53 effects of unemployment as there were too few individuals in the sample who lost their jobs  
54 between 2007 and 2009. While our findings are based on the potential effects of an economic  
55  
56  
57  
58  
59  
60

1  
2  
3 crisis on a change in smoking status, it is not clear whether these similar findings would hold true  
4 in normal scenarios and, thus, caution is warranted when generalizing our findings to other  
5 normative scenarios. Finally, smoking status was based on self-report only, and not validated by  
6 biomarkers such as cotinine. This may have produced misclassification of the outcome, though it  
7 is not clear whether this misclassification was differential by exposure status (e.g. income  
8 changes).

## 11 **Conclusions**

12  
13  
14 Our large population-based cohort with assessment points straddling the 2008 economic crisis in  
15 Iceland revealed a reduction in smoking rates from the short periods before and after the start of  
16 the crisis - though our study could not disentangle the direct effects of the crisis with other  
17 mechanisms, e.g. secular trends, changing cigarette prices. Chiefly, this examination revealed a  
18 role of income change on the risk of relapse after the collapse among former male smokers.  
19

## 22 **Notes**

23  
24 **Contributors:** CM and IK (study guarantor) were responsible for the design of the study and preparation  
25 of the manuscript. CM conducted data analyses. AH obtained funding. All contributors interpreted the  
26 data, contributed to the writing of the paper and approved the final version of the manuscript.  
27

28  
29 **Funding:** The project was funded in part by the Icelandic Centre for Research (RANNÍS). The authors  
30 are responsible for the manuscript's content, not the funding bodies.  
31

32  
33 **Competing interests:** All authors have completed the Unified Competing Interest form at  
34 [www.icmje.org/coi\\_disclosure.pdf](http://www.icmje.org/coi_disclosure.pdf) (available on request from the corresponding author) and declare: no  
35 other authors had financial relationships with any organisations that might have an interest in the  
36 submitted work in the previous 3 years.  
37

38  
39 **Ethical approval:** The study was approved by the Ethics Review Board of Iceland (09-094) and the Data  
40 Protection Authority of Iceland (S4455).  
41

42 **Data sharing:** No additional data available.  
43  
44  
45  
46  
47  
48  
49  
50  
51  
52  
53  
54  
55  
56  
57  
58  
59  
60

## Figures and Tables

Figure 1- The cohort of the “Health and well-being”-study.



Table 1 – Baseline characteristics (in 2007) of the cohort and among differential smoking status

|                           | Cohort                   | Relapsed in 2009 | Quit Smoking in 2009 |
|---------------------------|--------------------------|------------------|----------------------|
| <b>n</b>                  | 3755                     | 56               | 160                  |
| Age Mean ± SD             | 52.3 ± 16.0              | 45.7 ± 14.2      | 47.4 ± 15.5          |
| <b>Sex</b>                | <b>n (% of category)</b> |                  |                      |
| Male                      | 1763 (47.0)              | 31 (55.4)        | 82 (51.3)            |
| Female                    | 1992 (53.0)              | 25 (44.6)        | 78 (48.8)            |
| <b>Marital status</b>     |                          |                  |                      |
| Single/Divorced           | 556 (14.9)               | 7 (13.0)         | 31 (19.9)            |
| Committed, not cohabiting | 131 (3.5)                | 2 (3.7)          | 9 (5.8)              |
| Married, cohabiting       | 2871 (76.7)              | 45 (83.3)        | 116 (74.4)           |
| <b>Education</b>          |                          |                  |                      |
| Basic                     | 1688 (47.1)              | 22 (40.7)        | 65 (42.5)            |
| Middle                    | 971 (27.1)               | 15 (27.8)        | 51 (33.3)            |
| University                | 928 (25.9)               | 17 (31.5)        | 37 (24.2)            |
| <b>Employment status</b>  |                          |                  |                      |
| Employed                  | 2019 (58.4)              | 37 (71.2)        | 98 (64.5)            |
| Unemployed                | 169 (4.9)                | 3 (5.8)          | 10 (6.6)             |
| Student                   | 122 (3.5)                | 1 (1.9)          | 5 (3.3)              |
| Homemaker/Paternal Leave  | 159 (4.6)                | 2 (3.8)          | 9 (5.9)              |
| Retired                   | 872 (25.2)               | 4 (7.7)          | 24 (15.8)            |
| Disabled                  | 119 (3.4)                | 5 (9.6)          | 6 (3.9)              |
| <b>Household income</b>   |                          |                  |                      |

|        |             |           |           |
|--------|-------------|-----------|-----------|
| Low    | 621 (20.6)  | 8 (17.0)  | 22 (16.5) |
| Middle | 1855 (61.4) | 25 (53.2) | 80 (60.2) |
| High   | 543 (18.0)  | 14 (29.8) | 31 (23.3) |

Table 2 – The odds ratio of relapsing in 2009 among those who had quit smoking at the baseline (2007)

|                                                                   |                      | OR (95% CI) a |                   |                    |
|-------------------------------------------------------------------|----------------------|---------------|-------------------|--------------------|
| 2009 Status                                                       |                      | Overall       | Male              | Female             |
|                                                                   |                      |               | Ref               | 0.67 (0.38, 1.18)  |
| <b>Household income in 2009 b</b>                                 |                      | <b>n *</b>    |                   |                    |
|                                                                   | Low                  | 8             | 0.66 (0.26, 1.70) | 1.13 (0.24, 5.36)  |
|                                                                   | Middle               | 25            | 1.57 (0.48, 5.17) | 2.28 (0.38, 13.55) |
|                                                                   | High                 | 17            | Ref               | Ref                |
| <b>Household income in 2009 (among high income at baseline) b</b> |                      |               |                   |                    |
|                                                                   | High income in 2009  | 5             | Ref               | Ref                |
|                                                                   | Lower income in 2009 | 9             | 0.53 (0.28, 1.01) | 0.37 (0.16, 0.85)  |
| <b>Household income in 2009 (among low incomes at baseline) b</b> |                      |               |                   |                    |
|                                                                   | High income in 2009  | 23            | 3.14 (1.27, 7.72) | 4.02 (1.15, 14.00) |
|                                                                   | Lower income in 2009 | 7             | Ref               | Ref                |
| <b>Change in stress from 2007 to 2009 c</b>                       |                      |               |                   |                    |
|                                                                   | Same                 | 7             | Ref               | Ref                |
|                                                                   | Decreased            | 15            | 0.91 (0.35, 2.36) | 0.83 (0.23, 2.99)  |
|                                                                   | Increased            | 34            | 1.71 (0.86, 3.37) | 1.75 (0.68, 4.53)  |

\* Totals do not include missing values from 2009

a OR adjusted for statuses in 2009: age, sex

b OR adjusted for statuses in 2009: age, sex, baseline income in 2007

c OR additionally adjusted for baseline stress (2007)

Table 3 - The odds ratio of smoking cessation in 2009 among those who were smokers at the baseline (2007)

|                                                                   |                      | OR (95% CI) a        |                   |                   |
|-------------------------------------------------------------------|----------------------|----------------------|-------------------|-------------------|
| 2009 Status                                                       |                      | Overall              | Male              | Female            |
|                                                                   |                      |                      | Ref               | 0.65 (0.45, 0.93) |
| <b>Household income in 2009 b</b>                                 | <b>n *</b>           |                      |                   |                   |
|                                                                   | Low                  | 22 0.89 (0.49, 1.60) | 0.75 (0.33, 1.74) | 1.01 (0.43, 2.36) |
|                                                                   | Middle               | 80 0.98 (0.45, 2.13) | 0.80 (0.27, 2.38) | 1.12 (0.36, 3.46) |
|                                                                   | High                 | 31 Ref               | Ref               | Ref               |
| <b>Household income in 2009 (among high income at baseline) b</b> |                      |                      |                   |                   |
|                                                                   | High income in 2009  | 19 Ref               | Ref               | Ref               |
|                                                                   | Lower income in 2009 | 6 0.75 (0.46, 1.22)  | 0.82 (0.41, 1.62) | 0.68 (0.34, 1.37) |
| <b>Household income in 2009 (among low incomes at baseline) b</b> |                      |                      |                   |                   |
|                                                                   | High income in 2009  | 85 0.68 (0.30, 1.55) | 0.61 (0.19, 1.97) | 0.77 (0.24, 2.41) |
|                                                                   | Lower income in 2009 | 8 Ref                | Ref               | Ref               |
| <b>Change in stress from 2007 to 2009 c</b>                       |                      |                      |                   |                   |
|                                                                   | Same                 | 22 Ref               | Ref               | Ref               |
|                                                                   | Decreased            | 62 0.84 (0.47, 1.48) | 0.73 (0.34, 1.56) | 0.98 (0.41, 2.31) |
|                                                                   | Increased            | 76 0.98 (0.64, 1.51) | 0.66 (0.36, 1.22) | 1.38 (0.74, 2.58) |

\* Totals do not include missing values from 2009

a OR adjusted for statuses in 2009: age, sex

b OR adjusted for statuses in 2009: age, sex, baseline income in 2007

c OR additionally adjusted for baseline stress (2007)

Table 4 – Average stress levels according to smoking status – among waves (2007 &amp; 2009)

|                     | 2007             | 2009             |               |
|---------------------|------------------|------------------|---------------|
|                     | Stress Mean (SD) | Stress Mean (SD) | p-value (F) ± |
| <b>Never smoker</b> |                  |                  |               |
| Male                | 3.70 (2.75)      | 3.83 (2.69)      | 0.31 (1.02)   |
| Female              | 4.18 (2.70)      | 4.40 (2.90)      | 0.44 (0.60)   |
| <b>Relapsed</b>     |                  |                  |               |
| Male                | 3.52 (2.28)      | 4.94 (2.80)      | 0.28 (1.20)   |
| Female              | 3.96 (2.52)      | 5.24 (3.46)      | 0.01 (7.67)   |
| <b>Quit smoking</b> |                  |                  |               |



|        |             |             |             |
|--------|-------------|-------------|-------------|
| Male   | 4.21 (2.71) | 4.16 (2.78) | 0.91 (0.01) |
| Female | 4.38 (3.49) | 5.03 (3.35) | 0.13 (2.31) |

± Repeated measures ANOVA (p-values, F statistic) used to examine overall and gender-specific mean differences in stress levels from 2007 to 2009; adjusted for age in 2009

For peer review only

## References

- 1 Althingi. Special Investigation Report. *Althingi* [Icelandic Parliament] (Reykjavik, Iceland) <http://sic.althingi.is/>  
Assessed August 2, 2012.
- 2 Statistics Iceland. Wages, income and labour market. Statistical Series 2010;996(1095):391-28.
- 3 Gudjonsdottir GR, Kristjansson M, Olafsson O, Arna DO, Getz L, Sigurdsson JA, Gudmundsson S, Valdimarsdottir U. Immediate surge in female visits to the cardiac emergency department following the economic collapse in Iceland: an observational study. *Emerg Med J* 2011. doi:10.1136/emered-2011-200518
- 4 Hauksdóttir A, McClure C, Jónsson SH, Ólafsson Ö, Valdimarsdóttir U. Increased stress levels in women following an economic collapse. *American Journal of Epidemiology*.
- 5 Brenner HM. Relation of economic change to Swedish health and social well-being, 1950–1980. *Social Science & Medicine*. 1987;25(2):183–95.
- 6 Tapias Granados JA. Increasing mortality during the expansions of the US economy, 1900–1996. *Int J Epidemiol* 2005;34(6):1194–202.
- 7 Tapias Granados JA. Macroeconomic fluctuations and mortality in postwar Japan. *Demography* 2008;45(2):323–43.
- 8 Tapias Granados JA, Diez Roux AV. Life and death during the Great Depression. *PNAS* 2009;106(41):17290–5.
- 9 Stuckler D, Basu S, Suhrcke M, Coutts A, McKee M. The public health effect of economic crises and alternative policy responses in Europe: an empirical analysis. *Lancet* 2009;374: 315-323.
- 10 Khang Y-H, Lynch JW, Kaplan GA. Impact of economic crisis on cause-specific mortality in South Korea. *Int J Epidemiol* 2005;34(6):1291–1301.
- 11 Ruhm CJ. Good times make you sick. *Journal of Health Economics* 2003;22:637-658.
- 12 Ruhm CJ. Are recessions good for your health? *Q J Econ* 2000;115(2):617-650.
- 13 Shiahpush M, Carlin JB. Financial stress, smoking cessation and relapse: results from a prospective study of an Australian national sample. *Addiction* 2006;101(1):121-127.
- 14 Shaw B, Agahi N, Krause N. Are changes in financial strain associated with changes in alcohol use and smoking among older adults? *Journal of Studies on Alcohol and Drugs* 2011;72(6):917-925.
- 15 Gallus S, Tramacere I, Pacifici R, Zuccaro P, Colombo P, Ghislandi S, La Vecchia C. Smoking in Italy 2008-2009: a rise in prevalence related to the economic crisis? *Prev Med* 2011;52:182-183
- 16 Childs E, de Wit H. Effects of acute psychosocial stress on cigarette craving and smoking. *Nicotine Tob Res* 2010;12(4):449-453.
- 17 Tsoortos G, Ward PR, Muller R, Lawn S, Winefield AH, Hersh D, Coverney J. The importance of resilience and stress to maintaining smoking abstinence and cessation: a qualitative study in Australia with people diagnosed with depression. *Health & Social Care in the Community* 2011;19(3):299-306.
- 18 Cohen S, Kamarck T, Mermelstein R. A global measure of perceived stress. *J Health Soc Behav* 1983;24(4):385-396.
- 19 Cohen S, Williamson G. Perceived stress in a probability sample of the United States. In S. Spacapan S & Oskamp S (Eds.), *The social psychology of health: Claremont Symposium on applied social psychology* 1988. Newbury Park, CA: Sage.
- 20 Statistics Iceland. Lifestyle and health [Internet]. [cited 2012 Mar 22]. Available from: <http://www.statice.is/Statistics/Health,-social-affairs-and-justi/Lifestyle-and-health>
- 21 Ruhm CJ. Healthy living in hard times. *Journal of Health Economics* 2005;24(2):341–63.
- 22 Shiahpush M, Carlin JB. Financial stress, smoking cessation and relapse: results from a prospective study of an Australian national sample. *Addiction* 2006;101(1):121-127.
- 23 Parrott A. Does cigarette smoking cause stress? *American Psychologist* 1999;54(10):817-820.
- 24 Perkins KA, Grobe JE. Increased desire to smoke during acute stress. *British Journal of Addiction* 1992;87(7):1037-1040.
- 25 Aldwin CM, Revenson T. Vulnerability to economic stress. *Am J Community Psychology* 1986;14(2):161-175.
- 26 Cohen S, Lichtenstein E. Perceived stress, quitting smoking, and smoking relapse. *Health Psychol* 1990;9:466-478.

## Economic crisis and smoking behaviour: Prospective cohort study in Iceland

Christopher B. McClure, *doctoral student*,<sup>1-3</sup> Unnur A. Valdimarsdóttir, *associate professor and chair*,<sup>1</sup> Arna Hauksdóttir, *assistant professor*<sup>1</sup>, Ichiro Kawachi, *professor and chair*<sup>2</sup>

1. Centre of Public Health Sciences, University of Iceland, Stapi on Hringbraut, 101 Reykjavik, Iceland

2. Department of Society, Human Development, and Health, Harvard School of Public Health, 677 Huntington Avenue, Kresge Building 7th Floor, Boston, Massachusetts 02115, USA

3. [College of Public Health and Human Sciences, Oregon State University, 123 Women's Building, Corvallis, Oregon 97331, USA](#)

**Correspondence to:** C McClure [cbm1@hi.is](mailto:cbm1@hi.is)

“The Corresponding Author has the right to grant on behalf of all authors and does grant on behalf of all authors, a worldwide licence to the Publishers and its licensees in perpetuity, in all forms, formats and media (whether known now or created in the future), to i) publish, reproduce, distribute, display and store the Contribution, ii) translate the Contribution into other languages, create adaptations, reprints, include within collections and create summaries, extracts and/or, abstracts of the Contribution, iii) create any other derivative work(s) based on the Contribution, iv) to exploit all subsidiary rights in the Contribution, v) the inclusion of electronic links from the Contribution to third party material where-ever it may be located; and, vi) licence any third party to do any or all of the above.”

## Abstract

**Objective** To examine the associations between the 2008 economic collapse in Iceland and smoking behaviour at the national and individual levels. determine whether the strains of a national economic collapse affect smoking cessation and risk of smoking relapse at the national and individual level in the population.

**Design** A population-based, prospective cohort study based on a mail survey (*Health and Wellbeing in Iceland*) assessed in 2007 and 2009.

**Setting** National mail survey

**Participants** Representative cohort (n=3755) of Icelandic adults.

**Main outcome measure** Smoking status.

**Results** A significant reduction in the prevalence of smoking was observed from 2007 (pre-economic collapse) to 2009 (post-collapse) in both males (17.4% to 14.8%; P 0.01) and females (20.0% to 17.5%; P 0.01) in the cohort (n= 3755). At the individual level of analysis, male former smokers experiencing a reduction in income during the same period were less likely to relapse (OR 0.37; 95% CI 0.16, 0.85). Female smokers were less likely to quit over time compared to males (OR 0.65; 95% CI 0.45, 0.93). Among male former smokers who experienced an increase in income between 2007 and 2009, we observed an elevated risk of smoking relapse (OR 4.02; 95% CI 1.15, 14.00).

An increase in income from pre- to post-collapse among males (odds ratio 4.02; 95% confidence interval 1.15, 14.00) was strongly associated with an increased risk of relapse. Conversely, male former smokers experiencing a reduction in income were less likely to relapse (OR 0.37; 95% CI 0.16, 0.85). Regarding the propensity of pre-collapse smokers to quit in the period after the collapse, female smokers were less likely to quit compared to males (OR 0.65; 95% CI 0.45, 0.93).

**Conclusions** The national prevalence of smoking in Iceland declined following the 2008 economic crisis. This could be due to the pro-cyclical relationship between macro-economic conditions and smoking behaviour (i.e. hard times lead to less smoking because of lower affordability), or it may simply reflect a continuation of trends already in place prior to the crisis. In individual-level analysis, we find that former smokers who experienced a decline in income were less likely to relapse; and conversely, an increase in income raises the risk. However, caution is warranted since these findings are based on small numbers.

In line with on-going secular trend, the overall prevalence of smoking continued to decrease following the 2008 economic crisis in Iceland. Income increase during the period 2007-2009 was strongly associated with having relapsed in 2009, particularly among men, offering support for a

Formatted: Font: Not Bold

pro-cyclical association between smoking and income. Yet the findings must be taken with caution, as they are based on a low number of subjects.

## Article Summary

### Article Focus

- ◆ An examination on the association between economic crises and smoking behaviours, i.e. is a change in income (at both the national and individual levels) related to a change in smoking status?

### Key Messages

- ◆ National smoking prevalence declined in Iceland following the 2008 economic crisis.
- ◆ In individual-level analysis, male former smokers whose incomes declined experienced a reduced risk of smoking relapse.
- ◆ Conversely, an increase in income from 2007-2009 was associated with increased risk of relapse.
- ◆ Our findings are consistent with the hypothesis that economic downturns may result in decreased tobacco use (procyclical effect). ~~even though psychological stress increased in the aftermath of the crisis.~~ Evidence for the association between increased income and increased risk of smoking relapse following an economic collapse.

Evidence for an association between decreased income and decreased risk of relapse.

- ◆ Gender differences in smoking—represented by higher female prevalence rates and decreased likelihood of quitting for females compared to males.

### Strengths and limitations of this study

- ◆ A representative prospective cohort study assessed at two time points, which straddle the start of a severe economic crisis.
- ◆ Due to the low number of individuals that change their smoking behaviours in a short period, we were unable to assess the effects of a change in employment on smoking habits.
- ◆ Findings are based on a low number of subjects and must be taken with caution.

Formatted: Space After: 0 pt, Line spacing: single

## Introduction

The Icelandic economy was severely affected by the global economic collapse of 2008. ~~After a decade-long period of financial prosperity the nation was plunged into a recession of great severity, resulting in a severe currency crisis, as well as a drastic increase in national and household debts, runaway unemployment rates, and decreased per capita purchasing power. After a decade-long period of financial prosperity the nation was plunged into a recession of such severity that similar contractions had only been seen a handful of times before.~~<sup>1 2</sup>

Previous research on the health consequences of the Icelandic economic collapse has suggested adverse impacts on cardiovascular and mental health among women.<sup>3 4</sup> In the broader literature on economic crises and population health, however, it has been debated whether health moves in a pro-cyclical or counter-cyclical direction to macro-economic conditions. The work of Brenner beginning in the 1970s suggested that mortality is counter-cyclical, i.e. when the economy is down, mortality rates – in particular, suicides – rise.<sup>5</sup> However, in more recent years, a series of econometric studies have suggested that mortality is pro-cyclical, i.e. during economic contractions death rates decline.<sup>6 7 8 9</sup> There are plausible reasons for this unexpected finding – for instance, during the 1998 Korean financial crisis, economic activity was so depressed that there was a detectable decline in traffic-related mortality.<sup>10</sup> Others have speculated – without direct evidence – that people are more likely to be over-worked and “stressed” during economic booms than during busts, having less time flexibility to engage in health promoting behaviours.<sup>11 12</sup>

Few studies, however, have used individual-level data to test the association between recession and health, especially smoking. Most of the evidence to date has been at the ecological level, though not all.<sup>13</sup> For instance, Shaw et al. found a direct association between economic hardship and a propensity to smoke.<sup>14</sup> Using U.S. data, Ruhm previously reported that economic recession was associated with a decline in the prevalence of cigarette smoking.<sup>12 12</sup> A recent report from Gallus et al. found that the recent economic contraction in Italy has given rise to an increase in the percentage of current smokers – primarily for females.<sup>15</sup> In the present study, we took advantage of the natural experiment afforded by the Icelandic crisis to examine the relationship between changes in economic conditions and smoking behaviour. Utilizing a prospective cohort of Icelandic adults assessed before (in 2007) and after the start of the collapse (in 2009), we sought to examine the risk of relapse among pre-collapse former smokers, as well as quitting behaviour among current smokers in terms of economic changes. Furthermore, because of the important role of perceived stress on smoking status, we sought to examine the potential influence of stress on the studied associations.<sup>16 17</sup>

## Methods

Formatted: Superscript

## Design and Samples

### Cohort

Our cohort is based on the *Health and Wellbeing in Iceland* health survey. Data was collected by a questionnaire in two waves: (1) from October to December of 2007 (10-12 months pre-collapse), then again (2) between November and December of 2009 (13-14 months post-collapse). The cohort was based on a stratified random sample of the Icelandic population (n=9807), which was selected from 12 strata: consisting of two geographic regions further stratified by six age groups. Of the initial 9807, a total of 5918 responded to the initial 2007 assessment (response rate of 60.3%), with 4092 responding again to the modified version of the survey in 2009 (response rate of 82.8% of those who responded to the pre-collapse baseline survey). Because of the importance of stress as a potential predictor of smoking behaviour, we excluded individuals who did not have complete responses to the *Perceived Stress Scale* in both 2007 and 2009. This left a final analytical sample of n=3755. Figure 1 shows the cohort attrition over questionnaire waves.

### Measures

#### *Smoking status and behaviour*

In the questionnaire, we inquired about smoking status, i.e. whether respondents were current smokers, had quit smoking, or had never smoked. In order to examine the likelihood of relapsing or quitting following an economic collapse, respondents were stratified according to their smoking status: non-smoker, relapsed, and quit smoking.

Non-smoker: An individual was classified as a non-smoker if they responded that they did not currently smoke on both the 2007 and 2009 assessments.

Relapsed smoker: An individual was identified as relapsed if they indicated that they (a) were a former smoker on the 2007 questionnaire, but indicated they had (b) smoked in any frequency in 2009. In our analyses estimating the odds ratios of relapse, the base population was restricted to individuals who were former smokers at baseline.

Quit smoking: A respondent that had quit smoking must have indicated that they were (a) currently smoking in 2007, yet had (b) quit smoking by 2009. In our analyses estimating the odds ratios of quitting, our base population was restricted to individuals who were current smokers at baseline.

#### *Change in economic status*

Additional socio-economic questions pertained to employment and income status. Household income was classified into income ranges of (in terms of Icelandic currency; ISK) (1) low ( $\leq 3.4$  million ISK), (2) middle (3.5-9.4 million ISK), and (3) high ( $\geq 9.5$  million ISK); corresponding

1  
2  
3  
4  
5  
6  
7  
8  
9 approximately to (1)  $\leq 28,000$  USD, (2) 28,000-77,000 USD, and (3)  $\geq 77,000$  USD. For  
10 analysis of income change, household income was further dichotomized into either high or “low”  
11 (which combined the middle & low income categories). We examined two types of income  
12 change: a) drop in income between 2007 and 2009 from high to low; and b) a rise in income  
13 between 2007 and 2009 from low to high.  
14

#### 15 *Change in perceived stress*

16  
17 Psychological stress was measured in both 2007 and 2009 using the four-item Perceived Stress  
18 Scale (PSS-4).<sup>18</sup> The PSS-4 is a shortened, validated, and acceptable substitute for the original  
19 scale,<sup>19</sup> with scores ranging from 0-16; the higher the score, the higher the perceived stress. An  
20 increase in stress was classified as any increase from baseline to follow-up; conversely, a  
21 decrease was classified as any decrease from baseline to follow-up. For example, an individual  
22 with a score of 5 in 2007 and a score of 10 in 2009 would be classified as having an increase in  
23 stress.  
24

#### 25 *Explanatory variables and demographics*

26  
27 Our regression models controlled for the following socio-demographic covariates: age, sex,  
28 marital status, and education. Education was categorized as (1) basic (completed primary school  
29 or less), (2) middle (completed high school or equivalent), and (3) university (a completed  
30 university degree). Employment status was categorized as (1) employed, (2) unemployed, (3)  
31 student (4) homemaker/paternal leave, (5) retired, and (6) disabled.  
32

#### 33 **Statistical analyses**

34  
35 Table 1 presents the distribution of socio-demographic characteristics according to change in  
36 smoking status between 2007 and 2009.

37  
38 Binary logistic regression was used to estimate odds ratio (corresponding 95% confidence  
39 intervals) of relapse in 2009 (table 2), and the odds of quitting smoking in 2009 (table 3) by  
40 background characteristics, change in income and stress levels. Analyses were also stratified by  
41 gender. Models were adjusted for age and sex; models for household income and income change  
42 were additionally adjusted for baseline income levels. As previous research supports the role of  
43 stress as a mediator of an individual’s propensity to change smoking status,<sup>16+5 17+6 23+1</sup> we also  
44 ran models of relapse and cessation with and without the inclusion of (1) changes in stress levels  
45 between 2007 and 2009 and (2) baseline stress levels.  
46

47  
48 Repeated measures ANOVA (p-values, F statistic) was used to examine overall and gender-  
49 specific mean differences in stress levels from 2007 to 2009 (table 4). Statistical analyses were  
50 conducted with IBM SPSS Statistics version 19.0 (SPSS Inc, Chicago, Illinois). Statistical  
51 significance was set at the 0.05 level, and all tests were 2-tailed.  
52  
53  
54  
55  
56  
57  
58  
59  
60

Formatted: Superscript

Formatted: Superscript

Formatted: Superscript



## Results

### Baseline characteristics

Table 1 describes the baseline characteristics of the cohort in 2007 (n=3755), which was 53.0% female, 76.7% married/cohabiting, and with a mean (SD) age of 52.3 (16.0). Table 1 also describes the characteristics of those that had relapsed and quit: 72.2% (n=2711) of the cohort were non-smokers, 4.0% (n=56) of the former smokers at baseline had relapsed in 2009, and 22.2% (n=149) of smokers at baseline had quit smoking in 2009. A significant reduction ( $P < 0.01$ ) in the prevalence of smokers was observed from 2007 to 2009 in both males (17.4% to 14.8%) and females (20.0% to 17.5%).

### Relapse smoking

Among individuals who were former smokers at baseline (table 2), decreased odds of relapsing in 2009 (after the collapse) were observed in the older age groups (compared to those aged 18-39), regardless of gender (age of 40-59: odds ratio 0.38; 95% confidence interval 0.21, 0.69 | age  $\geq 60$ : 0.10; 0.04, 0.23).

While an individual's employment status was not involved in their risk of relapsing, retired females showed a significant increased risk of relapsing (4.12; 1.11, 15.29), compared to the employed.

Among men in the lower income groups at baseline (i.e. low, middle), those who moved into the high income group in 2009 experienced an increased risk of relapse (4.02; 1.15, 14.00)—while among those in the high income group at baseline, those whose incomes dropped had a decreased risk of relapsing (0.37; 0.16, 0.85). Further adjustments for a change in stress levels from 2007 to 2009, showed limited attenuation in the coefficients, suggesting some mediation by perceived stress – i.e. former smokers whose incomes increased between 2007 and 2009 may have relapsed in part because of an increase in stress.

### Smoking cessation

Females were less likely to quit smoking in 2009 (0.65; 0.45, 0.93), compared to males. An increased likelihood of quitting in 2009 was observed among the following female groups: those with middle (2.78; 1.48, 5.21) or university-level (2.73; 1.38, 5.40) education compared to a basic, and the disabled (3.42; 1.23, 9.52) compared to the employed. Compared to females aged 18-29, those in the middle-aged group (0.46; 0.26, 0.83) were less likely to quit. Additional adjustments for a change in stress levels from baseline to follow-up in the cessation models revealed no diminished significance in effect sizes.

### Stress and smoking

1  
2  
3  
4  
5  
6  
7  
8  
9 Though stress change (increase vs. stable, decrease vs. stable) did not predict a relapse in females  
10 in aforementioned analyses, further examination of changes in stress levels among smoking  
11 status displayed a significant change in mean stress levels (SD) among females that had relapsed,  
12 with a significant increase in stress scores from 3.96 (2.52) in 2007 to 5.24 (3.46) (P 0.01; F =  
13 7.67).

## 14 15 16 17 **Discussion**

18 In response to the severe economic collapse in Iceland, we found that the prevalence of smoking  
19 continued to decrease for both genders in the short period after. This drop in smoking may be  
20 attributed to background secular trends,<sup>20</sup> while other factors, such as changes in the price of  
21 cigarettes, ~~and changing norms about the acceptability of smoking, change of priorities in the~~  
22 ~~favour of more health promoting behaviours or anti smoking campaigns,~~ may also ~~have played~~ a  
23 role. The strength of our study is that we were able to document changes in individual economic  
24 status straddling the economic downturn and link these exposures to individual changes in  
25 smoking habits. Additionally, in comparison to national smoking rates (2007: 23.0% of  
26 population; 2009: 19.0%) the prevalence rates from 2007 to 2009 of this sample are relatively  
27 analogous – offering support for the generalizability of the sample.

28  
29  
30 Our findings partially corroborate previous research on the pro-cyclical nature of the association  
31 between economic downturns and smoking habit, i.e. during recessions, smoking habits may be  
32 dampened. Among male former smokers, those who experienced a decline in income during the  
33 economic recession had a significantly lower risk of relapse two years later. Conversely, among  
34 men whose incomes increased during the period of recession, their risk of relapse was  
35 considerably higher compared to those whose incomes stayed the same. Although the direction  
36 of associations was similar among women, none of the estimates were statistically significant.

37  
38 Taken together, the main significant finding of our analyses is that male former smokers whose  
39 incomes fell during the period of the economic collapse experienced a reduced risk of relapse.  
40 Ruhm hypothesized that this risk reduction is possibly driven by a tendency to adopt healthier  
41 behaviours during periods of reduced income – driven by an increase in positive health  
42 behaviours (i.e. exercise) that accompanies newly acquired increased leisure time during  
43 economic contractions.<sup>21</sup> It could also be argued their behaviour change in a recession can be  
44 either intentional or inadvertent. When facing enforced economic inactivity – individuals may  
45 choose to fill their time by actively investing in positive personal health changes, which include  
46 stopping smoking or joining a fitness club. ~~It is equally plausible that a drop in income~~  
47 ~~involuntarily forces smokers to give up their habit.~~ However, our results did not indicate an  
48 increased risk of quitting among those whose incomes fell – which is inconsistent with ~~the latter~~  
49 ~~hypothesis, as well as~~ previous research by Siahpush & Carlin.<sup>22</sup>  
50  
51  
52  
53  
54  
55  
56  
57  
58  
59  
60

1  
2  
3  
4  
5  
6  
7  
8  
9 It is possible that smoking cessation and smoking relapse are “asymmetric” behaviors with  
10 different triggers. Thus, a former smoker who experiences a drop in income may be less tempted  
11 to start smoking again because of the reduced affordability of cigarettes. On the other hand,  
12 someone who is already smoking may be less sensitive to an income drop (higher income  
13 inelasticity) –i.e. he is unable to quit his ongoing behavior because of the offsetting increase in  
14 stress (although our data on self-reported stress did not support this).

15  
16 There is an apparent discrepancy between the national decline in smoking in Iceland and the fact  
17 that smokers whose incomes declined were not more likely to quit. This underscores the point  
18 that macro-level data and individual-level patterns are often driven by a different set of causes.  
19 Thus, the overall decline in national smoking rates could be either due to the procyclical nature  
20 of smoking (i.e. recessions are good for health), or it may simply reflect a continuation of trends  
21 already in place prior to the recession (i.e. national anti-smoking campaigns, declining social  
22 acceptability of smoking, etc). In other words, national averages are driven by more than the  
23 group of smokers whose incomes decreased after the crisis.

24  
25 Foremost, our findings support Ruhm’s theory of the positive effects of recessions on a  
26 population’s health behaviours.<sup>12</sup> Ruhm revealed an association between markers (e.g.  
27 unemployment) of economic downturns and reductions in smoking, with an increase being seen  
28 during economic expansion. Though tobacco products are likely to be procyclical goods, as  
29 Ruhm further points out, offering some explanation of the decrease we observed, it does not  
30 explain all of the mechanisms involved.

31  
32 Furthermore, we caution that our findings regarding recession, income change, and smoking  
33 habits cannot be generalized to other health outcomes. For example, observational reports found  
34 a spike in female cardiac emergency visits during the week corresponding to the economic  
35 collapse in October of 2008.<sup>3</sup> In accordance with this, our previous analysis on changes in  
36 mental health revealed significant increases in stress for mainly women.<sup>4</sup> This increase in stress  
37 for women, however threatening to related health outcomes, did not prove to be associated with  
38 an increased likelihood of relapsing.

39  
40 Our findings are also congruent with multiple models explaining the link between stress levels  
41 and smoking behaviour. Though much research shows stress as a cause of smoking,<sup>16+5 17+6</sup>  
42 additional research actually points to cigarette smoking as a cause of stress and, furthermore,  
43 smoking cessation as leading to a reduction in stress.<sup>23</sup> This is in line with our findings, as both  
44 male and female relapsed smokers had the lowest levels of stress before the collapse when they  
45 considered themselves as having quit smoking in 2007 (table 4), yet experienced an increase in  
46 stress post-collapse—significantly for women. This may also point to a vulnerability of this  
47 group to use smoking as a means of alleviating stress—explaining their relapse in smoking after  
48 the collapse.<sup>24</sup> This vulnerability has been discussed and supported by previous research showing  
49 economic stress as a cause of adverse mental health.<sup>25</sup> This increased stress may have also been  
50 amplified by a return to smoking, as Cohen & Lichtenstein have found.<sup>26</sup> Caution is warranted in  
51  
52  
53  
54  
55  
56  
57  
58  
59  
60

Formatted: Superscript

Formatted: Superscript

1  
2  
3  
4  
5  
6  
7  
8  
9  
10  
11  
12  
13  
14  
15  
16  
17  
18  
19  
20  
21  
22  
23  
24  
25  
26  
27  
28  
29  
30  
31  
32  
33  
34  
35  
36  
37  
38  
39  
40  
41  
42  
43  
44  
45  
46  
47  
48  
49  
50  
51  
52  
53  
54  
55  
56  
57  
58  
59  
60

interpreting the findings on stress, however, since smokers may be citing an increase in perceived stress to justify their relapse or failure to quit. We cannot conclusively argue that stress did not play a mediating role in the association between income change and smoking behaviour because of measurement error.

### Study limitations

Some limitations of our study should be noted. Relapsed smokers and quitters represent a small proportion of the population, and hence our odds ratios were estimated with imprecision and must be interpreted with caution. Similarly, we lacked statistical power to directly examine the effects of a change in employment status on change in smoking habits. In other words, though we were able to examine the effects of income change, we were not able to directly estimate the effects of unemployment as there were too few individuals in the sample who lost their jobs between 2007 and 2009. While our findings are based on the potential effects of an economic crisis on a change in smoking status, it is not clear whether these similar findings would hold true in normal scenarios and, thus, caution is warranted when generalizing our findings to other normative scenarios. Finally, smoking status was based on self-report only, and not validated by biomarkers such as cotinine. This may have produced misclassification of the outcome, though it is not clear whether this misclassification was differential by exposure status (e.g. income changes).

### Conclusions

Our large population-based cohort with assessment points straddling the 2008 economic crisis in Iceland revealed a reduction in smoking rates from the short periods before and after the start of the crisis - though our study could not disentangle the direct effects of the crisis with other mechanisms, e.g. secular trends, changing cigarette prices. Chiefly, this examination revealed a decisive role of income change on the risk of relapsing after the collapse among former male smokers.

### Notes

**Contributors:** CM and IK (study guarantor) were responsible for the design of the study and preparation of the manuscript. CM conducted data analyses. AH obtained funding. All contributors interpreted the data, contributed to the writing of the paper and approved the final version of the manuscript.

**Funding:** The project was funded in part by the Icelandic Centre for Research (RANNÍS). The authors are responsible for the manuscript's content, not the funding bodies.

**Competing interests:** All authors have completed the Unified Competing Interest form at [www.icmje.org/coi\\_disclosure.pdf](http://www.icmje.org/coi_disclosure.pdf) (available on request from the corresponding author) and declare: no other authors had financial relationships with any organisations that might have an interest in the submitted work in the previous 3 years.

1  
2  
3  
4  
5  
6  
7  
8  
9 **Ethical approval:** The study was approved by the Ethics Review Board of Iceland (09-094) and the Data  
10 Protection Authority of Iceland (S4455).

11 **Data sharing:** No additional data available.  
12  
13  
14  
15  
16  
17  
18  
19  
20  
21  
22  
23  
24  
25  
26  
27  
28  
29  
30  
31  
32  
33  
34  
35  
36  
37  
38  
39  
40  
41  
42  
43  
44  
45  
46  
47  
48  
49  
50  
51  
52  
53  
54  
55  
56  
57  
58  
59  
60

For peer review only

## Figures and Tables

Figure 1- The cohort of the “Health and well-being”-study.

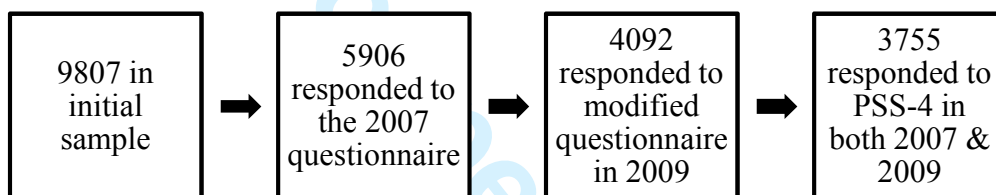

Table 1 – Baseline characteristics (in 2007) of the cohort and among differential smoking status

|                           | Cohort                   | Relapsed in 2009 | Quit Smoking in 2009 |
|---------------------------|--------------------------|------------------|----------------------|
| <b>n</b>                  | 3755                     | 56               | 160                  |
| Age Mean ± SD             | 52.3 ± 16.0              | 45.7 ± 14.2      | 47.4 ± 15.5          |
| <b>Sex</b>                | <b>n (% of category)</b> |                  |                      |
| Male                      | 1763 (47.0)              | 31 (55.4)        | 82 (51.3)            |
| Female                    | 1992 (53.0)              | 25 (44.6)        | 78 (48.8)            |
| <b>Marital status</b>     |                          |                  |                      |
| Single/Divorced           | 556 (14.9)               | 7 (13.0)         | 31 (19.9)            |
| Committed, not cohabiting | 131 (3.5)                | 2 (3.7)          | 9 (5.8)              |
| Married, cohabiting       | 2871 (76.7)              | 45 (83.3)        | 116 (74.4)           |
| <b>Education</b>          |                          |                  |                      |
| Basic                     | 1688 (47.1)              | 22 (40.7)        | 65 (42.5)            |
| Middle                    | 971 (27.1)               | 15 (27.8)        | 51 (33.3)            |
| University                | 928 (25.9)               | 17 (31.5)        | 37 (24.2)            |
| <b>Employment status</b>  |                          |                  |                      |
| Employed                  | 2019 (58.4)              | 37 (71.2)        | 98 (64.5)            |
| Unemployed                | 169 (4.9)                | 3 (5.8)          | 10 (6.6)             |
| Student                   | 122 (3.5)                | 1 (1.9)          | 5 (3.3)              |
| Homemaker/Paternal Leave  | 159 (4.6)                | 2 (3.8)          | 9 (5.9)              |
| Retired                   | 872 (25.2)               | 4 (7.7)          | 24 (15.8)            |
| Disabled                  | 119 (3.4)                | 5 (9.6)          | 6 (3.9)              |
| <b>Household income</b>   |                          |                  |                      |

|        |             |           |           |
|--------|-------------|-----------|-----------|
| Low    | 621 (20.6)  | 8 (17.0)  | 22 (16.5) |
| Middle | 1855 (61.4) | 25 (53.2) | 80 (60.2) |
| High   | 543 (18.0)  | 14 (29.8) | 31 (23.3) |

Table 2 – The odds ratio of relapsing in 2009 among those who had quit smoking at the baseline (2007)

|                                                                   |            | OR (95% CI) a     |                    |                   |
|-------------------------------------------------------------------|------------|-------------------|--------------------|-------------------|
| 2009 Status                                                       | Overall    | Male              | Female             |                   |
|                                                                   |            | Ref               | 0.67 (0.38, 1.18)  |                   |
| <b>Household income in 2009 b</b>                                 | <b>n *</b> |                   |                    |                   |
| Low                                                               | 8          | 0.66 (0.26, 1.70) | 1.13 (0.24, 5.36)  | 0.56 (0.15, 2.08) |
| Middle                                                            | 25         | 1.57 (0.48, 5.17) | 2.28 (0.38, 13.55) | 1.31 (0.21, 8.32) |
| High                                                              | 17         | Ref               | Ref                | Ref               |
| <b>Household income in 2009 (among high income at baseline) b</b> |            |                   |                    |                   |
| High income in 2009                                               | 5          | Ref               | Ref                | Ref               |
| Lower income in 2009                                              | 9          | 0.53 (0.28, 1.01) | 0.37 (0.16, 0.85)  | 0.92 (0.29, 2.88) |
| <b>Household income in 2009 (among low incomes at baseline) b</b> |            |                   |                    |                   |
| High income in 2009                                               | 23         | 3.14 (1.27, 7.72) | 4.02 (1.15, 14.00) | 2.43 (0.64, 9.19) |
| Lower income in 2009                                              | 7          | Ref               | Ref                | Ref               |
| <b>Change in stress from 2007 to 2009 c</b>                       |            |                   |                    |                   |
| Same                                                              | 7          | Ref               | Ref                | Ref               |
| Decreased                                                         | 15         | 0.91 (0.35, 2.36) | 0.83 (0.23, 2.99)  | 1.03 (0.25, 4.28) |
| Increased                                                         | 34         | 1.71 (0.86, 3.37) | 1.75 (0.68, 4.53)  | 1.64 (0.61, 4.39) |

\* Totals do not include missing values from 2009

a OR adjusted for statuses in 2009: age, sex

b OR adjusted for statuses in 2009: age, sex, baseline income in 2007

c OR additionally adjusted for baseline stress (2007)

Table 3 - The odds ratio of smoking cessation in 2009 among those who were smokers at the baseline (2007)

|                                                                   |                      | OR (95% CI) a        |                   |                   |
|-------------------------------------------------------------------|----------------------|----------------------|-------------------|-------------------|
| 2009 Status                                                       |                      | Overall              | Male              | Female            |
|                                                                   |                      |                      | Ref               | 0.65 (0.45, 0.93) |
| <b>Household income in 2009 b</b>                                 | <b>n *</b>           |                      |                   |                   |
|                                                                   | Low                  | 22 0.89 (0.49, 1.60) | 0.75 (0.33, 1.74) | 1.01 (0.43, 2.36) |
|                                                                   | Middle               | 80 0.98 (0.45, 2.13) | 0.80 (0.27, 2.38) | 1.12 (0.36, 3.46) |
|                                                                   | High                 | 31 Ref               | Ref               | Ref               |
| <b>Household income in 2009 (among high income at baseline) b</b> |                      |                      |                   |                   |
|                                                                   | High income in 2009  | 19 Ref               | Ref               | Ref               |
|                                                                   | Lower income in 2009 | 6 0.75 (0.46, 1.22)  | 0.82 (0.41, 1.62) | 0.68 (0.34, 1.37) |
| <b>Household income in 2009 (among low incomes at baseline) b</b> |                      |                      |                   |                   |
|                                                                   | High income in 2009  | 85 0.68 (0.30, 1.55) | 0.61 (0.19, 1.97) | 0.77 (0.24, 2.41) |
|                                                                   | Lower income in 2009 | 8 Ref                | Ref               | Ref               |
| <b>Change in stress from 2007 to 2009 c</b>                       |                      |                      |                   |                   |
|                                                                   | Same                 | 22 Ref               | Ref               | Ref               |
|                                                                   | Decreased            | 62 0.84 (0.47, 1.48) | 0.73 (0.34, 1.56) | 0.98 (0.41, 2.31) |
|                                                                   | Increased            | 76 0.98 (0.64, 1.51) | 0.66 (0.36, 1.22) | 1.38 (0.74, 2.58) |

\* Totals do not include missing values from 2009

a OR adjusted for statuses in 2009: age, sex

b OR adjusted for statuses in 2009: age, sex, baseline income in 2007

c OR additionally adjusted for baseline stress (2007)

Table 4 – Average stress levels according to smoking status – among waves (2007 & 2009)

|                     | 2007             | 2009             |               |
|---------------------|------------------|------------------|---------------|
|                     | Stress Mean (SD) | Stress Mean (SD) | p-value (F) ± |
| <b>Never smoker</b> |                  |                  |               |
| Male                | 3.70 (2.75)      | 3.83 (2.69)      | 0.31 (1.02)   |
| Female              | 4.18 (2.70)      | 4.40 (2.90)      | 0.44 (0.60)   |
| <b>Relapsed</b>     |                  |                  |               |
| Male                | 3.52 (2.28)      | 4.94 (2.80)      | 0.28 (1.20)   |
| Female              | 3.96 (2.52)      | 5.24 (3.46)      | 0.01 (7.67)   |
| <b>Quit smoking</b> |                  |                  |               |



|        |             |             |             |
|--------|-------------|-------------|-------------|
| Male   | 4.21 (2.71) | 4.16 (2.78) | 0.91 (0.01) |
| Female | 4.38 (3.49) | 5.03 (3.35) | 0.13 (2.31) |

± Repeated measures ANOVA (p-values, F statistic) used to examine overall and gender-specific mean differences in stress levels from 2007 to 2009; adjusted for age in 2009

For peer review only

## References

- 1 [Althingi. Special Investigation Report. Althingi \[Icelandic Parliament\] \(Reykjavik, Iceland\) http://sic.althingi.is/ Assessed August 2, 2012.](http://sic.althingi.is/) Wade RG, Sigurgeirsdottir S. Iceland's rise, fall, stabilisation and beyond. *Cambridge Journal of Economics* 2012;36:127-144.
- 2 [Statistics Iceland. Wages, income and labour market. Statistical Series 2010:996\(1095\):391-28.](#) Vainan V, Sigurjonsson TO, Davidsson PA. Weak business culture as antecedents of economic crisis: the case of Iceland. *J Business Ethics* 2011;98(2).
- 3 Gudjonsdottir GR, Kristjansson M, Olafsson O, Arna DO, Getz L, Sigurdsson JA, Gudmundsson S, Valdimarsdottir U. Immediate surge in female visits to the cardiac emergency department following the economic collapse in Iceland: an observational study. *Emerg Med J* 2011. doi:10.1136/emmermed-2011-200518
- 4 Hauksdottir A, McClure C, Jónsson SH, Ólafsson Ö, Valdimarsdóttir U. Increased stress levels in women following an economic collapse. *Submitted 2011 American Journal of Epidemiology*.
- 5 Brenner HM. Relation of economic change to Swedish health and social well-being, 1950-1980. *Social Science & Medicine*. 1987;25(2):183-95.
- 6 Tapias Granados JA. Increasing mortality during the expansions of the US economy, 1900-1996. *Int J Epidemiol* 2005;34(6):1194-202.
- 7 Tapias Granados JA. Macroeconomic fluctuations and mortality in postwar Japan. *Demography* 2008;45(2):323-43.
- 8 Tapias Granados JA, Diez Roux AV. Life and death during the Great Depression. *PNAS* 2009;106(41):17290-5.
- 9 Stuckler D, Basu S, Suhrcke M, Coutts A, McKee M. The public health effect of economic crises and alternative policy responses in Europe: an empirical analysis. *Lancet* 2009;374: 315-323.
- 10 Khang Y-H, Lynch JW, Kaplan GA. Impact of economic crisis on cause-specific mortality in South Korea. *Int J Epidemiol* 2005;34(6):1291-1301.
- 11 Ruhm CJ. Good times make you sick. *Journal of Health Economics* 2003;22:637-658.
- 12 Ruhm CJ. Are recessions good for your health? *Q J Econ* 2000;115(2):617-650.
- 13 Shiahpush M, Carlin JB. Financial stress, smoking cessation and relapse: results from a prospective study of an Australian national sample. *Addiction* 2006;101(1):121-127.
- 14 Shaw B, Agahi N, Krause N. Are changes in financial strain associated with changes in alcohol use and smoking among older adults? *Journal of Studies on Alcohol and Drugs* 2011;72(6):917-925.
- 15 Gallus S, Tramacere I, Pacifici R, Zuccaro P, Colombo P, Ghislandi S, La Vecchia C. Smoking in Italy 2008-2009: a rise in prevalence related to the economic crisis? *Prev Med* 2011;52:182-183
- 16 Childs E, de Wit H. Effects of acute psychosocial stress on cigarette craving and smoking. *Nicotine Tob Res* 2010;12(4):449-453.
- 17 Tsourtos G, Ward PR, Muller R, Lawn S, Winefield AH, Hersh D, Coverney J. The importance of resilience and stress to maintaining smoking abstinence and cessation: a qualitative study in Australia with people diagnosed with depression. *Health & Social Care in the Community* 2011;19(3):299-306.
- 18 Cohen S, Kamarck T, Mermelstein R. A global measure of perceived stress. *J Health Soc Behav* 1983;24(4):385-396.
- 19 Cohen S, Williamson G. Perceived stress in a probability sample of the United States. In S. Spacapan S & Oskamp S (Eds.), *The social psychology of health: Claremont Symposium on applied social psychology* 1988. Newbury Park, CA: Sage.
- 20 Statistics Iceland. Lifestyle and health [Internet]. [cited 2012 Mar 22]. Available from: <http://www.statice.is/Statistics/Health,-social-affairs-and-justi/Lifestyle-and-health>
- 21 Ruhm CJ. Healthy living in hard times. *Journal of Health Economics* 2005;24(2):341-63.
- 22 Shiahpush M, Carlin JB. Financial stress, smoking cessation and relapse: results from a prospective study of an Australian national sample. *Addiction* 2006;101(1):121-127.
- 23 Parrott A. Does cigarette smoking cause stress? *American Psychologist* 1999;54(10):817-820.
- 24 Perkins KA, Grobe JE. Increased desire to smoke during acute stress. *British Journal of Addiction* 1992;87(7):1037-1040.
- 25 Aldwin CM, Revenson T. Vulnerability to economic stress. *Am J Community Psychology* 1986;14(2):161-175.
- 26 Cohen S, Lichtenstein E. Perceived stress, quitting smoking, and smoking relapse. *Health Psychol* 1990;9:466-478.
